# Supplementary material for: Spatial layout optimization model integrating layered attention mechanism in the development of smart tourism management
Source: PeerJ Comput Sci. 2024 Oct 9;10:e2329. doi: 10.7717/peerj-cs.2329 (PMC11623231; doi:10.7717/peerj-cs.2329)
Supplement: Supplemental Information 1 [file peerj-cs-10-2329-s001.xlsx]

## Sheet: The forbidden city
0	3312.74
1	3954.73
2	2928.86
3	3606.46
4	3262.04
5	3077.34
6	2909.13
7	3243.58
8	3382.49
9	3279.73
10	3361.63
11	3357.06
12	3156.16
13	3596.32
14	3036.52
15	2528.73
16	2710.93
17	3773.1
18	3064.12
19	2896.45
20	2934.82
21	2963.99
22	3047.29
23	3044.58
24	3132.38
25	3671.49
26	3223.26
27	3604.47
28	3443.47
29	3306.18
30	3014.59
31	3054.63
32	3125.67
33	2801.62
34	3878.68
35	3512.54
36	2985.66
37	2890.92
38	3152.07
39	3438.54
40	3114.73
41	2792.85
42	2911.37
43	3191.12
44	3567.65
45	3184.35
46	3491.64
47	3034.78
48	3191.63
49	3244.03
50	2681.66
51	2481.82
52	3326.39
53	3151.53
54	3568.98
55	3179.64
56	3074.54
57	3030.83
58	3406.12
59	3358.62
60	3471.93
61	3819.07
62	3392.84
63	2658.77
64	3242.28
65	3674.4
66	2884.83
67	3192.33
68	2726.18
69	3318.71
70	3047.6
71	2707.72
72	3377.07
73	3873.41
74	3403.7
75	3144.62
76	4177.74
77	2988.42
78	3551.91
79	3442.14
80	3439.47
81	3224.78
82	2771.29
83	3413.78
84	3272.76
85	2755.2
86	4090.27
87	3701.1
88	3218.06
89	2844.06
90	3009.87
91	3109.18
92	3203.27
93	2935.34
94	2925.59
95	3045.8
96	2922.7
97	3574.95
98	2919.25
99	3405.23
100	3888.64
101	2907.6
102	3366.04
103	3012.1
104	3130.67
105	2772.65
106	3762.54
107	3237.01
108	3166.1
109	3209.69
110	3159.56
111	2873.63
112	3169.73
113	3540.64
114	3881.8
115	3229.13
116	2442.26
117	3658.61
118	3167.08
119	3635.67
120	3510.56
121	3164.44
122	2946.02
123	3644.24
124	2950.06
125	3006.63
126	3521.51
127	3328.86
128	2705.42
129	3148.93
130	3161.77
131	3162.64
132	3321.01
133	2763.45
134	3069.89
135	2764.2
136	3445.54
137	3582.22
138	3141.99
139	3321.5
140	3422.28
141	3355.56
142	3388.89
143	3137.68
144	3335.01
145	2799.46
146	3359.1
147	3589.49
148	3144.19
149	3203.24
150	3816.22
151	3137.24
152	3256.96
153	3438.97
154	2924.43
155	3289.21
156	3563.59
157	3334.65
158	3266.05
159	2689.14
160	2844.36
161	2552.78
162	2884.41
163	3302.72
164	3178.79
165	2892.85
166	3964.54
167	3013.6
168	3222.19
169	3200.93
170	3255.76
171	3475.68
172	2481.64
173	2713.39
174	2664.91
175	3322.35
176	3195.4
177	3194.15
178	3220.14
179	3555.39
180	3080.76
181	2682.71
182	2866.32
183	2836.41
184	2774.62
185	3223.7
186	2704.2
187	3112.93
188	3628.26
189	2803.99
190	3077.9
191	2883.97
192	2836.97
193	3647.81
194	2987.2
195	2808.35
196	2830.51
197	2954.68
198	3257.82
199	2922.9
200	3550.14
201	3114.73
202	3291.1
203	2807.04
204	3033.73
205	3297.16
206	2930.91
207	2945.46
208	3162.35
209	3179.42
210	2781.38
211	3257.29
212	3608.24
213	3730.88
214	2672.81
215	3691.05
216	3717.05
217	3327.62
218	2929.12
219	3401.6
220	3247.48
221	2819.78
222	3075.75
223	3069.71
224	3422.94
225	3234.93
226	2906.89
227	3565.79
228	3573.37
229	3229.62
230	3380.76
231	3308.95
232	3230.67
233	2651.17
234	3569.57
235	2876.25
236	3110.34
237	3421.4
238	3587.37
239	2739.9
240	3070.15
241	2743.23
242	3596.09
243	3129.04
244	2988.67
245	2513.87
246	2784.23
247	3023.96
248	3689.51
249	3158.15
250	3094.3
251	3266.25
252	3150.19
253	3241.51
254	3409.64
255	3218.69
256	3407
257	3152.81
258	3013.51
259	3540.51
260	3303.5
261	2938.46
262	2923.27
263	3800.88
264	3306.81
265	2424.32
266	3105.25
267	3529.28
268	3317.42
269	2996.33
270	3271.21
271	2512.3
272	3425.71
273	3512.3
274	2990.29
275	3278.11
276	3729.44
277	3053.39
278	3429.47
279	3224.35
280	3263.91
281	4036.98
282	3660.53
283	2937.25
284	2870.63
285	2762.07
286	3349.81
287	3720.98
288	2995.5
289	3070.82
290	3471.02
291	3419.12
292	3494.45
293	3397.07
294	3172.42
295	3088.6
296	3017.61
297	3205.27
298	2946.79
299	3216.85
300	3017.76
301	2878.66
302	3314.23
303	3466.56
304	3938.12
305	3567.99
306	2795.56
307	3419.68
308	2588.65
309	3132.23
310	3167.5
311	3268.02
312	3398.4
313	3395.23
314	3109.82
315	3424.09
316	3173.21
317	3023.17
318	3144.29
319	2606.77
320	3458.46
321	3217.69
322	3603.75
323	3169.69
324	2412.12
325	3491.55
326	3195.23
327	3649.63
328	3336.2
329	2835.22
330	2874.31
331	3336.04
332	3481.7
333	3165.02
334	3161.23
335	3142.54
336	2932.02
337	3549.31
338	3044.75
339	2939.99
340	2836.68
341	3536.95
342	3035.51
343	2972.61
344	3068.1
345	2928.09
346	3096.89
347	3036.82
348	3000.74
349	3113.78
350	3458.55
351	2609.74
352	3219.9
353	2767.47
354	2059.94
355	3118.78
356	3432.44
357	3497.31
358	3464.64
359	3303.59
360	2793.89
361	3527.78
362	2838.53
363	3105.58
364	3193.11
365	2854.13
366	3052.77
367	2836.21
368	3865.8
369	2862.81
370	3153.31
371	3032.12
372	3059.99
373	3085.37
374	3255.35
375	3469.04
376	2543.53
377	3249.67
378	3270.04
379	2991.13
380	2522.67
381	3815.31
382	3001.43
383	3445.38
384	3154.79
385	3439.35
386	3084.09
387	3159.27
388	3298.15
389	3315.75
390	3401.64
391	2944.8
392	3361.99
393	3114.48
394	2661.6
395	3172.98
396	3471.82
397	3405.44
398	3329.67
399	3370.51
400	3235.18
401	3600.94
402	3613.83
403	3015.83
404	2970.15
405	3053.64
406	3052.82
407	2731.94
408	3142.55
409	3290.15
410	3241.01
411	3698.19
412	3208.24
413	3207.91
414	3281.1
415	2957.78
416	3370.43
417	3654.96
418	3501.08
419	3609.29
420	3210.76
421	2805.87
422	2625.64
423	3341.71
424	3393.16
425	3058.4
426	3257.11
427	2881.29
428	3021.53
429	3621.37
430	3435.05
431	2874.18
432	3281.06
433	2514.14
434	3292.99
435	3326.5
436	2868.73
437	2663.89
438	3561.84
439	3678.58
440	3152.25
441	3025.45
442	2782.69
443	3351.54
444	3082.8
445	2748.69
446	3052.34
447	3419.64
448	3118.32
449	3268.85
450	2935.56
451	3056.72
452	3481.9
453	3168.92
454	3399.28
455	3411.76
456	3223.59
457	3463.64
458	3332.75
459	2884.75
460	3550.11
461	3007.43
462	2566.08
463	3410.28
464	2956.71
465	3694.5
466	2737.27
467	2586.07
468	2954.07
469	2991.88
470	3208.9
471	3457.31
472	3495.91
473	2901.33
474	3144.91
475	2960.87
476	3500.19
477	3568.03
478	3346.41
479	2711.56
480	3134.86
481	3500.43
482	3227.81
483	3172.56
484	3238.62
485	3605.56
486	3273.63
487	2731.67
488	2633.46
489	3115.21
490	3508.6
491	3361.55
492	3221.7
493	2892.19
494	3394.05
495	3002.69
496	2894.98
497	3169.66
498	2981.9
499	3112.36
500	3595.03
501	2935.3
502	2730.91
503	2949.78
504	3240.7
505	3809.82
506	3411.6
507	3181.08
508	3347.39
509	3457.38
510	3349.45
511	2917.73
512	3735.04
513	2841.02
514	3170.3
515	2756.56
516	3309.4
517	3134.01
518	3109.57
519	3534.17
520	2888.96
521	3787.43
522	3488.6
523	3234.65
524	2999
525	3477.83
526	3300.38
527	3136.63
528	3665.62
529	3532.26
530	3047.85
531	3630.25
532	3071.96
533	2667.47
534	3070.68
535	3305.36
536	3182.11
537	2938.07
538	2682.81
539	3370.62
540	3107.42
541	3107.9
542	2693.94
543	3523.94
544	3133.78
545	3614.31
546	2899.92
547	3490.51
548	2923.82
549	2580.53
550	3129.2
551	3130.34
552	3358.64
553	3258.78
554	3571.72
555	3226.48
556	3160.44
557	2616.22
558	3011.35
559	3205.75
560	3273.27
561	2709.64
562	3533.46
563	3464.81
564	2834.43
565	2568.23
566	3328.02
567	3179.52
568	3167.76
569	2757.91
570	3879.76
571	2954.75
572	3220.34
573	2910.18
574	2458.97
575	2984.06
576	3333.33
577	2909.14
578	3003.92
579	3105.33
580	3466.77
581	3293.74
582	3412.85
583	3400.25
584	3017.51
585	3679.8
586	3410.8
587	2681.86
588	3460.01
589	2791.34
590	3554.08
591	3253.08
592	3264.87
593	3378.95
594	3525.34
595	3070.76
596	2939.68
597	3624.46
598	3428.68
599	2614.63
600	3200.86
601	3153.87
602	2892.86
603	2999.65
604	3421.88
605	3881.66
606	3538.88
607	3006.45
608	3124.02
609	3095.67
610	3207.56
611	3143.45
612	2996.88
613	3122.59
614	3011.64
615	3605.3
616	3393.37
617	3446.6
618	3156.34
619	3105.73
620	3420.54
621	2765.93
622	3769.24
623	3609.53
624	3768.57
625	3243.38
626	3444.59
627	2713.14
628	2822.24
629	3166.89
630	2851.28
631	3021.54
632	3260.52
633	3206.37
634	3078.82
635	2575.99
636	3019.73
637	2811.04
638	3207.37
639	2942.42
640	3513.4
641	3158.49
642	3381.89
643	3233.58
644	3352.97
645	2750.08
646	3379.24
647	3073.71
648	2782.44
649	3273.06
650	2788.42
651	3569.51
652	2825.77
653	3405.82
654	3599.47
655	3364.56
656	2607.83
657	2931.09
658	3587.16
659	3369.99
660	3646.41
661	3394.91
662	3510.97
663	3396.96
664	3077.69
665	3360.33
666	3286.52
667	3706.43
668	3470.38
669	2860.49
670	3593.6
671	3251.31
672	3308.64
673	3242.21
674	3457.91
675	3377.21
676	2948.31
677	2827.01
678	3181.83
679	3565.61
680	3639.25
681	3145.15
682	3272.09
683	3517.93
684	3137.61
685	3157.59
686	3237.04
687	3177.93
688	3217.09
689	3442.84
690	3208.31
691	3349.22
692	3423.82
693	2475.94
694	3229.19
695	3312.36
696	3859.86
697	3396.14
698	3032.77
699	2846.22
700	3676.71
701	3164.11
702	2506.38
703	3360.6
704	3052.32
705	3686.72
706	3226.62
707	3018.8
708	2627.79
709	3117.01
710	2733.66
711	2707.43
712	3670.5
713	3197.5
714	2929.52
715	3309.59
716	3144.94
717	3531.93
718	2558.76
719	3447.75
720	3457.47
721	3249.84
722	3148.98
723	2986.68
724	3095.18
725	3381.09
726	3135.91
727	2897.76
728	3060.26
729	3374.25
730	3398.9
731	2776.36
732	3110.27
733	3273.66
734	3308.17
735	3081.44
736	3670.36
737	3027.01
738	3107.22
739	3261.83
740	3401.73
741	3049.29
742	3281.03
743	2912.83
744	3224.25
745	3541.93
746	3434.56
747	3232.03
748	3931.61
749	3099.96
750	2959.28
751	3259.31
752	3030.9
753	3103.21
754	3469.27
755	2595.89
756	3534.9
757	2222.91
758	2995.54
759	3749.68
760	3173.96
761	2946.22
762	3473.72
763	3307.32
764	3250.66
765	3280.41
766	3313.57
767	3628.39
768	3342.82
769	4384.48
770	3440.26
771	3651.11
772	2851.74
773	3264.79
774	3091.17
775	3233.3
776	3025.03
777	2940.34
778	3633.08
779	3602.51
780	3238.86
781	3271.49
782	3475.88
783	3409.91
784	3047.07
785	2449.24
786	3127.65
787	2788.3
788	3017.57
789	4447.17
790	2899.61
791	2765.28
792	3212.4
793	2609.45
794	2909.16
795	3340.6
796	3311.29
797	3483.21
798	2633.24
799	3677.32
800	3409.46
801	3881.63
802	2964.14
803	2997.45
804	2791.2
805	3225.1
806	2529.22
807	3380.72
808	3083.97
809	3123.82
810	3216.31
811	3426.47
812	2662.75
813	3299.41
814	3264.76
815	3002.49
816	3111.15
817	2792.95
818	3261.03
819	2881.57
820	3151.48
821	2839.72
822	3180.24
823	2726.49
824	3087.08
825	3568.24
826	3366.05
827	3333.84
828	3105.12
829	3582.73
830	3515.6
831	3581.54
832	3152.83
833	3453.92
834	3647.87
835	3127.75
836	2973.02
837	3551.94
838	3363.65
839	3281.49
840	2827.61
841	3108.1
842	3516.71
843	3066.84
844	3299.07
845	3238.58
846	3462.78
847	2818.01
848	3524.51
849	3323.33
850	3228.36
851	3259.06
852	2887.47
853	3169.01
854	3016.41
855	3355.34
856	3058.51
857	3612.34
858	3287.53
859	3243.29
860	2945.18
861	3618.26
862	3569.59
863	3190.3
864	3321.07
865	3909.49
866	3175.72
867	3059.59
868	3077.26
869	3739.47
870	3266.65
871	3285.81
872	3338.04
873	3328.99
874	2602.86
875	2727.87
876	3105.32
877	3303.28
878	3088.22
879	2949.03
880	2694.34
881	3274.51
882	3977.62
883	3219.31
884	2771.25
885	3169.52
886	3144.81
887	3311.05
888	3593.5
889	3247.4
890	3355.81
891	3142.87
892	3041.88
893	2951.43
894	3668.61
895	3500.56
896	2973.01
897	2806.87
898	3734.49
899	2772.96
900	3112.86
901	3095.53
902	3406.74
903	3483.01
904	3388.66
905	2877.91
906	3426.47
907	2928.94
908	3163.08
909	3652.94
910	3379.94
911	2853.48
912	3359.51
913	3402.89
914	2899.92
915	3151.02
916	3479.53
917	3561.43
918	3108.05
919	3475.99
920	3663.74
921	2410.25
922	2886.64
923	3133.14
924	2787.27
925	2789.09
926	2857.78
927	3236.59
928	2987.92
929	2997.06
930	3177.35
931	3968.69
932	3599.62
933	3135.4
934	3439.15
935	3553.18
936	3304.69
937	2833.38
938	3959.43
939	3035.72
940	3284.44
941	3337.5
942	3345.06
943	2931.27
944	3282.46
945	3340.56
946	2925.74
947	3187.58
948	3333.87
949	3030.25
950	2907.44
951	3098.6
952	3319.25
953	2796.88
954	2893.56
955	2848.25
956	3586.57
957	3319.15
958	3451.02
959	3588.29
960	2811.95
961	3052.87
962	3488.49
963	3073.32
964	3948.81
965	2970.48
966	2386.85
967	3018.55
968	4044.67
969	3671.17
970	3024.27
971	3921.27
972	3364.04
973	3389.99
974	3256.69
975	3610.63
976	3117.26
977	2924.49
978	3152.7
979	2936.94
980	3248.75
981	3418.55
982	2998.2
983	2549.99
984	4222.87
985	2977.88
986	2964.56
987	2657.58
988	3667.77
989	2434.66
990	3500.48
991	3312.9
992	3630.43
993	3140.22
994	3450.63
995	3296.4
996	3276.3
997	3068.31
998	3182.75
999	2727.39
1000	3380.43
1001	2952.39
1002	2942.57
1003	3009.97
1004	3315.89
1005	3439.2
1006	3128.77
1007	3265.02
1008	3044.28
1009	3107.63
1010	3282.94
1011	2659.25
1012	3171.92
1013	3214.43
1014	4053.26
1015	3244.69
1016	3215.48
1017	3050.59
1018	2950.49
1019	3031.41
1020	3168.27
1021	2733.1
1022	2675.17
1023	2422.65
1024	3550.31
1025	3074.55
1026	3013.89
1027	3745.2
1028	3482.16
1029	3064.43
1030	3371.16
1031	3250.32
1032	3393.72
1033	3151.22
1034	2965.63
1035	3227.84
1036	3485.3
1037	3738.34
1038	3163.13
1039	3307.27
1040	3043.43
1041	2775.52
1042	3353.74
1043	2911.94
1044	3253.97
1045	3663.69
1046	3183.49
1047	3261.89
1048	3222.41
1049	3191.71
1050	3077.01
1051	3667.64
1052	2995.48
1053	3102.04
1054	3147.24
1055	3281.94
1056	3672.61
1057	3589.88
1058	2765.33
1059	2809.09
1060	3167.18
1061	2888.74
1062	3114.55
1063	2992.65
1064	3368.89
1065	2735.91
1066	2892.37
1067	2998.22
1068	2770.7
1069	3162.86
1070	3282.39
1071	2852.15
1072	2570.65
1073	3182.14
1074	3397.22
1075	3008.46
1076	3424.32
1077	3063.65
1078	3321.48
1079	3423.8
1080	2711.45
1081	3696.04
1082	3246.32
1083	3465.32
1084	3181.89
1085	3263.01
1086	2860.81
1087	3530.79
1088	3190.48
1089	3187.09
1090	3155.66
1091	2642.35
1092	3591.62
1093	3140.58
1094	3700.59
1095	3159.64
1096	3423.35
1097	3572.63
1098	2917.85
1099	2865.29
1100	2951.11
1101	3223.22
1102	3765.73
1103	3105.48
1104	2959.74
1105	3689.52
1106	2831.2
1107	3617.46
1108	3409.61
1109	3505.08
1110	2676.45
1111	3299.9
1112	3009.25
1113	3413.63
1114	3830.5
1115	3225.17
1116	3459.16
1117	2657.49
1118	2935.89
1119	3546.31
1120	2771.64
1121	3315.11
1122	3253.17
1123	3127.68
1124	2820.33
1125	3623.07
1126	2557.6
1127	3775.67
1128	3347.12
1129	2692.17
1130	3287.3
1131	3492.93
1132	3213.59
1133	3234.32
1134	2801.78
1135	3253.18
1136	3167.6
1137	2639.18
1138	3756.22
1139	3665.42
1140	3069.97
1141	3290.9
1142	2920.61
1143	3556.99
1144	3667.16
1145	3410.28
1146	3135.13
1147	3533.71
1148	3135.9
1149	3663.26
1150	3443.87
1151	3346.05
1152	3372.52
1153	2509.75
1154	3379.17
1155	3056.25
1156	3238.83
1157	3003.9
1158	3945.28
1159	2939.69
1160	3099.52
1161	3123.76
1162	2842.65
1163	3374.95
1164	3632.04
1165	3560.81
1166	3477.93
1167	2707.26
1168	3395.6
1169	2989.08
1170	3503.95
1171	2702.35
1172	3683.08
1173	3366.57
1174	2940.51
1175	3250.72
1176	3110.32
1177	2996.71
1178	2373.12
1179	3054.57
1180	3304.01
1181	3283.12
1182	3346.47
1183	3518.62
1184	3484.08
1185	3489.47
1186	3373.62
1187	3313.85
1188	2924.94
1189	3260.81
1190	3607.02
1191	2914.53
1192	3361.04
1193	2949.65
1194	3748.16
1195	2923.5
1196	3485.91
1197	3403.75
1198	3637.41
1199	2819.28
1200	3106.18
1201	2927.68
1202	2602.54
1203	3280.87
1204	3453.81
1205	3244.26
1206	2732
1207	2818.93
1208	3305.69
1209	2961.05
1210	3391.21
1211	2735.7
1212	3397.92
1213	3035.17
1214	3492.53
1215	2840.84
1216	2647.93
1217	3451.53
1218	3056.24
1219	3157.21
1220	3212.3
1221	3258.88
1222	3186.29
1223	2929.07
1224	2993.23
1225	2744.28
1226	3547.11
1227	3864.01
1228	3178.29
1229	3422.94
1230	3261.21
1231	2601.75
1232	2895.35
1233	3077.87
1234	3233.13
1235	3383.49
1236	3176.51
1237	2763.19
1238	2937.25
1239	3484.19
1240	3331.73
1241	3500.97
1242	3945.29
1243	3380.12
1244	2875.13
1245	2905.39
1246	2906.55
1247	3299.51
1248	3279.34
1249	3052.62
1250	3532.5
1251	3786.88
1252	3502.59
1253	3355.5
1254	3347.84
1255	3388.17
1256	3159.02
1257	3660.01
1258	3253.73
1259	3012.7
1260	3603.24
1261	3435.32
1262	3332.34
1263	3793.33
1264	3005.79
1265	3089.99
1266	3801.62
1267	3376.89
1268	3085.68
1269	3436.09
1270	3172.38
1271	3410.89
1272	3289.52
1273	3435.7
1274	3231.73
1275	3495.03
1276	3273.1
1277	3022.1
1278	3486.4
1279	3023.87
1280	3094.98
1281	3161.36
1282	3270.69
1283	3418.1
1284	3556.52
1285	3231.94
1286	3412.11
1287	3420.38
1288	2969.78
1289	2935.46
1290	2887.27
1291	3121.1
1292	2756.13
1293	3011.38
1294	2687.69
1295	3434.14
1296	2994.64
1297	2924.95
1298	3230.47
1299	3066.72
1300	2816.78
1301	3101.55
1302	3037.38
1303	3285.3
1304	3855.43
1305	3541.36
1306	3494.74
1307	3507.26
1308	2954.86
1309	3375.55
1310	3223.9
1311	2352.89
1312	3304.24
1313	3381.69
1314	3180.44
1315	3630.5
1316	3423.73
1317	3444.54
1318	2656.32
1319	2977.38
1320	2704.75
1321	2232.1
1322	3195.3
1323	2820.29
1324	2704.63
1325	3073.88
1326	2995.85
1327	3484.42
1328	3043.09
1329	2841.52
1330	3693.1
1331	3291.58
1332	3609.94
1333	3158.13
1334	3258.09
1335	2908.64
1336	2588.58
1337	3413.42
1338	2800.91
1339	3472.27
1340	3477.34
1341	3038.37
1342	3170.59
1343	3074.26
1344	3570.12
1345	3224.78
1346	2927.94
1347	3032.74
1348	2730.44
1349	3127.16
1350	3066.52
1351	2984.03
1352	3202.39
1353	2952.13
1354	3286.45
1355	3344.42
1356	3919.69
1357	3367.04
1358	3069.3
1359	2938.9
1360	2967.2
1361	3649.56
1362	3085.3
1363	3247.22
1364	3329.16
1365	3620.3
1366	3119.32
1367	2991.38
1368	2965.65
1369	2966.85
1370	3866.07
1371	3008.25
1372	2972.03
1373	3388.12
1374	2563.12
1375	3321.19
1376	3379.83
1377	2956.45
1378	3821.29
1379	3061.68
1380	3231.63
1381	2857.08
1382	3362.95
1383	3083.07
1384	3185.27
1385	3369.93
1386	2663.78
1387	3261.06
1388	3512.61
1389	3604.53
1390	3155.34
1391	2746.41
1392	3362.52
1393	3253.34
1394	3239.44
1395	3047.19
1396	2787.86
1397	3164.8
1398	2677.08
1399	3110.69
1400	3206.19
1401	3177.84
1402	2893.66
1403	3231.22
1404	3194.91
1405	3115.1
1406	2428.6
1407	3246.58
1408	3821.37
1409	2816.47
1410	3100.3
1411	2798.21
1412	3611.72
1413	3186.58
1414	3029.13
1415	3437.42
1416	2907.25
1417	3103.39
1418	3130.32
1419	3555.36
1420	3132.69
1421	3202.75
1422	3340.47
1423	3806.32
1424	2948.32
1425	3427.21
1426	2674.52
1427	3429.87
1428	2908.05
1429	3256.86
1430	3542.26
1431	3490.89
1432	3223.19
1433	3345.69
1434	3098.44
1435	3819.17
1436	3328.4
1437	3076.72
1438	3306.39
1439	3359.89
1440	3450.78
1441	3267.63
1442	3364.5
1443	3432.81
1444	2983.34
1445	3065.48
1446	3605.91
1447	3209.9
1448	3445.95
1449	2572.98
1450	3608.62
1451	2798.65
1452	3039.56
1453	3669.15
1454	3340.17
1455	3422.73
1456	3164.79
1457	3508.12
1458	3300.39
1459	3465.11
1460	2709.39
1461	2640.84
1462	3348.18
1463	2639.02
1464	2973.53
1465	2795.28
1466	3422.88
1467	3171.57
1468	3374.32
1469	3216.74
1470	3300.44
1471	3070.48
1472	3127.53
1473	3371.08
1474	3461.48
1475	2969.93
1476	3095.92
1477	3584.09
1478	3269.75
1479	3500.83
1480	3414.89
1481	2489.33
1482	2789.64
1483	3307.7
1484	3445.99
1485	3093.35
1486	2930.71
1487	3322.02
1488	3540.53
1489	3248.08
1490	2470.53
1491	3262.93
1492	3063.19
1493	3885.22
1494	2979.8
1495	3076.78
1496	3033.84
1497	3143.33
1498	3519.46
1499	3092.87
1500	3367.94

## Sheet: Zhongshan park
0	1850.42
1	2137.52
2	1678.74
3	1981.77
4	1827.75
5	1745.14
6	1669.92
7	1819.49
8	1881.61
9	1835.65
10	1872.28
11	1870.24
12	1780.4
13	1977.24
14	1726.89
15	1499.8
16	1581.28
17	2056.3
18	1739.23
19	1664.25
20	1681.41
21	1694.45
22	1731.71
23	1730.49
24	1769.76
25	2010.86
26	1810.4
27	1980.89
28	1908.88
29	1847.48
30	1717.08
31	1734.99
32	1766.76
33	1621.84
34	2103.51
35	1939.77
36	1704.15
37	1661.78
38	1778.57
39	1906.68
40	1761.87
41	1617.92
42	1670.92
43	1796.03
44	1964.42
45	1793
46	1930.42
47	1726.11
48	1796.26
49	1819.69
50	1568.19
51	1478.82
52	1856.52
53	1778.33
54	1965.02
55	1790.9
56	1743.89
57	1724.35
58	1892.18
59	1870.94
60	1921.61
61	2076.86
62	1886.24
63	1557.96
64	1818.91
65	2012.16
66	1659.05
67	1796.57
68	1588.1
69	1853.09
70	1731.85
71	1579.84
72	1879.19
73	2101.16
74	1891.1
75	1775.23
76	2237.26
77	1705.38
78	1957.38
79	1908.29
80	1907.09
81	1811.08
82	1608.28
83	1895.61
84	1832.54
85	1601.08
86	2198.14
87	2024.1
88	1808.08
89	1640.82
90	1714.97
91	1759.39
92	1801.46
93	1681.64
94	1677.28
95	1731.04
96	1675.99
97	1967.68
98	1674.45
99	1891.78
100	2107.97
101	1669.23
102	1874.25
103	1715.97
104	1769
105	1608.89
106	2051.58
107	1816.55
108	1784.84
109	1804.33
110	1781.91
111	1654.04
112	1786.46
113	1952.34
114	2104.91
115	1813.03
116	1461.13
117	2005.1
118	1785.28
119	1994.84
120	1938.89
121	1784.1
122	1686.42
123	1998.67
124	1688.22
125	1713.52
126	1943.78
127	1857.63
128	1578.82
129	1777.16
130	1782.9
131	1783.29
132	1854.12
133	1604.77
134	1741.81
135	1605.1
136	1909.81
137	1970.93
138	1774.06
139	1854.34
140	1899.41
141	1869.57
142	1884.47
143	1772.13
144	1860.38
145	1620.87
146	1871.15
147	1974.19
148	1775.04
149	1801.45
150	2075.58
151	1771.93
152	1825.47
153	1906.87
154	1676.76
155	1839.9
156	1962.6
157	1860.22
158	1829.54
159	1571.54
160	1640.95
161	1510.55
162	1658.86
163	1845.94
164	1790.51
165	1662.64
166	2141.91
167	1716.64
168	1809.93
169	1800.42
170	1824.93
171	1923.29
172	1478.74
173	1582.38
174	1560.7
175	1854.72
176	1797.94
177	1797.39
178	1809.01
179	1958.93
180	1746.68
181	1568.66
182	1650.78
183	1637.4
184	1609.77
185	1810.6
186	1578.27
187	1761.06
188	1991.52
189	1622.9
190	1745.4
191	1658.67
192	1637.65
193	2000.27
194	1704.83
195	1624.85
196	1634.76
197	1690.29
198	1825.86
199	1676.08
200	1956.59
201	1761.86
202	1840.74
203	1624.26
204	1725.64
205	1843.45
206	1679.66
207	1686.17
208	1783.16
209	1790.79
210	1612.79
211	1825.62
212	1982.57
213	2037.42
214	1564.23
215	2019.61
216	2031.23
217	1857.07
218	1678.86
219	1890.16
220	1821.23
221	1629.96
222	1744.43
223	1741.73
224	1899.7
225	1815.62
226	1668.92
227	1963.59
228	1966.98
229	1813.24
230	1880.84
231	1848.73
232	1813.72
233	1554.56
234	1965.28
235	1655.22
236	1759.9
237	1899.01
238	1973.24
239	1594.24
240	1741.93
241	1595.72
242	1977.14
243	1768.27
244	1705.49
245	1493.15
246	1614.06
247	1721.27
248	2018.92
249	1781.28
250	1752.73
251	1829.63
252	1777.73
253	1818.56
254	1893.75
255	1808.36
256	1892.57
257	1778.9
258	1716.6
259	1952.28
260	1846.29
261	1683.04
262	1676.24
263	2068.72
264	1847.77
265	1453.11
266	1757.63
267	1947.26
268	1852.51
269	1708.91
270	1831.84
271	1492.45
272	1900.94
273	1939.67
274	1706.22
275	1834.93
276	2036.77
277	1734.43
278	1902.62
279	1810.89
280	1828.58
281	2174.31
282	2005.95
283	1682.49
284	1652.7
285	1604.15
286	1867
287	2032.99
288	1708.55
289	1742.23
290	1921.21
291	1898
292	1931.68
293	1888.13
294	1787.66
295	1750.18
296	1718.43
297	1802.36
298	1686.76
299	1807.54
300	1718.5
301	1656.29
302	1851.09
303	1919.21
304	2130.1
305	1964.57
306	1619.13
307	1898.24
308	1526.6
309	1769.69
310	1785.47
311	1830.42
312	1888.73
313	1887.31
314	1759.67
315	1900.22
316	1788.02
317	1720.92
318	1775.08
319	1534.7
320	1915.59
321	1807.91
322	1980.56
323	1786.45
324	1447.65
325	1930.38
326	1797.87
327	2001.08
328	1860.91
329	1636.86
330	1654.35
331	1860.84
332	1925.98
333	1784.36
334	1782.66
335	1774.3
336	1680.16
337	1956.22
338	1730.57
339	1683.72
340	1637.52
341	1950.69
342	1726.44
343	1698.31
344	1741.01
345	1678.4
346	1753.89
347	1727.02
348	1710.89
349	1761.44
350	1915.63
351	1536.03
352	1808.9
353	1606.57
354	1290.15
355	1763.68
356	1903.95
357	1932.96
358	1918.35
359	1846.32
360	1618.38
361	1946.59
362	1638.35
363	1757.77
364	1796.92
365	1645.32
366	1734.16
367	1637.31
368	2097.76
369	1649.21
370	1779.12
371	1724.92
372	1737.38
373	1748.73
374	1824.75
375	1920.32
376	1506.42
377	1822.21
378	1831.32
379	1706.59
380	1497.09
381	2075.17
382	1711.2
383	1909.74
384	1779.78
385	1907.04
386	1748.16
387	1781.78
388	1843.89
389	1851.77
390	1890.18
391	1685.87
392	1872.45
393	1761.76
394	1559.22
395	1787.92
396	1921.56
397	1891.87
398	1857.99
399	1876.25
400	1815.73
401	1979.3
402	1985.07
403	1717.64
404	1697.21
405	1734.54
406	1734.18
407	1590.68
408	1774.31
409	1840.32
410	1818.34
411	2022.8
412	1803.68
413	1803.54
414	1836.27
415	1691.68
416	1876.22
417	2003.47
418	1934.65
419	1983.04
420	1804.81
421	1623.74
422	1543.14
423	1863.38
424	1886.38
425	1736.68
426	1825.54
427	1657.47
428	1720.19
429	1988.44
430	1905.12
431	1654.29
432	1836.25
433	1493.27
434	1841.59
435	1856.57
436	1651.85
437	1560.25
438	1961.82
439	2014.03
440	1778.65
441	1721.94
442	1613.37
443	1867.77
444	1747.59
445	1598.17
446	1733.97
447	1898.22
448	1763.47
449	1830.79
450	1681.74
451	1735.92
452	1926.07
453	1786.1
454	1889.12
455	1894.7
456	1810.55
457	1917.9
458	1859.37
459	1659.02
460	1956.57
461	1713.88
462	1516.5
463	1894.04
464	1691.2
465	2021.15
466	1593.06
467	1525.44
468	1690.02
469	1706.93
470	1803.98
471	1915.07
472	1932.33
473	1666.43
474	1775.36
475	1693.06
476	1934.25
477	1964.59
478	1865.48
479	1581.56
480	1770.87
481	1934.36
482	1812.44
483	1787.73
484	1817.27
485	1981.37
486	1832.93
487	1590.55
488	1546.63
489	1762.08
490	1938.01
491	1872.25
492	1809.7
493	1662.35
494	1886.78
495	1711.76
496	1663.59
497	1786.43
498	1702.46
499	1760.81
500	1976.66
501	1681.62
502	1590.22
503	1688.1
504	1818.2
505	2072.72
506	1894.63
507	1791.54
508	1865.92
509	1915.11
510	1866.84
511	1673.77
512	2039.28
513	1639.46
514	1786.72
515	1601.69
516	1848.93
517	1770.49
518	1759.56
519	1949.45
520	1660.9
521	2062.71
522	1929.06
523	1815.5
524	1710.11
525	1924.25
526	1844.89
527	1771.66
528	2008.23
529	1948.59
530	1731.96
531	1992.41
532	1742.74
533	1561.84
534	1742.17
535	1847.12
536	1792
537	1682.86
538	1568.7
539	1876.3
540	1758.6
541	1758.81
542	1573.68
543	1944.87
544	1770.39
545	1985.29
546	1665.8
547	1929.92
548	1676.49
549	1522.97
550	1768.34
551	1768.85
552	1870.94
553	1826.29
554	1966.24
555	1811.84
556	1782.31
557	1538.92
558	1715.63
559	1802.57
560	1832.77
561	1580.7
562	1949.13
563	1918.43
564	1636.51
565	1517.46
566	1857.25
567	1790.84
568	1785.58
569	1602.29
570	2104
571	1690.32
572	1809.1
573	1670.39
574	1468.6
575	1703.43
576	1859.63
577	1669.92
578	1712.31
579	1757.66
580	1919.3
581	1841.92
582	1895.19
583	1889.55
584	1718.39
585	2014.57
586	1894.27
587	1568.28
588	1916.28
589	1617.24
590	1958.35
591	1823.74
592	1829.01
593	1880.03
594	1945.5
595	1742.2
596	1683.58
597	1989.82
598	1902.27
599	1538.22
600	1800.38
601	1779.37
602	1662.64
603	1710.4
604	1899.23
605	2104.85
606	1951.55
607	1713.44
608	1766.02
609	1753.34
610	1803.38
611	1774.71
612	1709.16
613	1765.38
614	1715.76
615	1981.26
616	1886.48
617	1910.28
618	1780.47
619	1757.84
620	1898.63
621	1605.88
622	2054.57
623	1983.15
624	2054.27
625	1819.4
626	1909.38
627	1582.27
628	1631.06
629	1785.19
630	1644.05
631	1720.19
632	1827.06
633	1802.85
634	1745.81
635	1520.93
636	1719.38
637	1626.05
638	1803.29
639	1684.8
640	1940.15
641	1781.44
642	1881.35
643	1815.02
644	1868.41
645	1598.79
646	1880.16
647	1743.52
648	1613.26
649	1832.67
650	1615.94
651	1965.25
652	1632.64
653	1892.05
654	1978.65
655	1873.59
656	1535.17
657	1679.74
658	1973.14
659	1876.02
660	1999.64
661	1887.17
662	1939.07
663	1888.08
664	1745.3
665	1871.7
666	1838.69
667	2026.48
668	1920.92
669	1648.17
670	1976.02
671	1822.95
672	1848.59
673	1818.88
674	1915.34
675	1879.25
676	1687.44
677	1633.19
678	1791.87
679	1963.51
680	1996.44
681	1775.47
682	1832.24
683	1942.18
684	1772.1
685	1781.03
686	1816.57
687	1790.13
688	1807.64
689	1908.6
690	1803.71
691	1866.73
692	1900.09
693	1476.19
694	1813.05
695	1850.25
696	2095.1
697	1887.72
698	1725.21
699	1641.78
700	2013.19
701	1783.95
702	1489.8
703	1871.82
704	1733.96
705	2017.67
706	1811.91
707	1718.96
708	1544.1
709	1762.89
710	1591.45
711	1579.71
712	2010.42
713	1798.88
714	1679.04
715	1849.01
716	1775.38
717	1948.45
718	1513.23
719	1910.8
720	1915.14
721	1822.29
722	1777.18
723	1704.6
724	1753.12
725	1880.99
726	1771.34
727	1664.84
728	1737.51
729	1877.93
730	1888.95
731	1610.54
732	1759.87
733	1832.94
734	1848.38
735	1746.98
736	2010.35
737	1722.63
738	1758.51
739	1827.65
740	1890.21
741	1732.6
742	1836.24
743	1671.57
744	1810.84
745	1952.92
746	1904.9
747	1814.32
748	2127.19
749	1755.26
750	1692.35
751	1850.42
752	2137.52
753	1678.74
754	1981.77
755	1827.75
756	1745.14
757	1669.92
758	1819.49
759	1881.61
760	1835.65
761	1872.28
762	1870.24
763	1780.4
764	1977.24
765	1726.89
766	1499.8
767	1581.28
768	2056.3
769	1739.23
770	1664.25
771	1681.41
772	1694.45
773	1731.71
774	1730.49
775	1769.76
776	2010.86
777	1810.4
778	1980.89
779	1908.88
780	1847.48
781	1717.08
782	1734.99
783	1766.76
784	1621.84
785	2103.51
786	1939.77
787	1704.15
788	1661.78
789	1778.57
790	1906.68
791	1761.87
792	1617.92
793	1670.92
794	1796.03
795	1964.42
796	1793
797	1930.42
798	1726.11
799	1796.26
800	1819.69
801	1568.19
802	1478.82
803	1856.52
804	1778.33
805	1965.02
806	1790.9
807	1743.89
808	1724.35
809	1892.18
810	1870.94
811	1921.61
812	2076.86
813	1886.24
814	1557.96
815	1818.91
816	2012.16
817	1659.05
818	1796.57
819	1588.1
820	1853.09
821	1731.85
822	1579.84
823	1879.19
824	2101.16
825	1891.1
826	1775.23
827	2237.26
828	1705.38
829	1957.38
830	1908.29
831	1907.09
832	1811.08
833	1608.28
834	1895.61
835	1832.54
836	1601.08
837	2198.14
838	2024.1
839	1808.08
840	1640.82
841	1714.97
842	1759.39
843	1801.46
844	1681.64
845	1677.28
846	1731.04
847	1675.99
848	1967.68
849	1674.45
850	1891.78
851	2107.97
852	1669.23
853	1874.25
854	1715.97
855	1769
856	1608.89
857	2051.58
858	1816.55
859	1784.84
860	1804.33
861	1781.91
862	1654.04
863	1786.46
864	1952.34
865	2104.91
866	1813.03
867	1461.13
868	2005.1
869	1785.28
870	1994.84
871	1938.89
872	1784.1
873	1686.42
874	1998.67
875	1688.22
876	1713.52
877	1943.78
878	1857.63
879	1578.82
880	1777.16
881	1782.9
882	1783.29
883	1854.12
884	1604.77
885	1741.81
886	1605.1
887	1909.81
888	1970.93
889	1774.06
890	1854.34
891	1899.41
892	1869.57
893	1884.47
894	1772.13
895	1860.38
896	1620.87
897	1871.15
898	1974.19
899	1775.04
900	1801.45
901	2075.58
902	1771.93
903	1825.47
904	1906.87
905	1676.76
906	1839.9
907	1962.6
908	1860.22
909	1829.54
910	1571.54
911	1640.95
912	1510.55
913	1658.86
914	1845.94
915	1790.51
916	1662.64
917	2141.91
918	1716.64
919	1809.93
920	1800.42
921	1824.93
922	1923.29
923	1478.74
924	1582.38
925	1560.7
926	1854.72
927	1797.94
928	1797.39
929	1809.01
930	1958.93
931	1746.68
932	1568.66
933	1650.78
934	1637.4
935	1609.77
936	1810.6
937	1578.27
938	1761.06
939	1991.52
940	1622.9
941	1745.4
942	1658.67
943	1637.65
944	2000.27
945	1704.83
946	1624.85
947	1634.76
948	1690.29
949	1825.86
950	1676.08
951	1956.59
952	1761.86
953	1840.74
954	1624.26
955	1725.64
956	1843.45
957	1679.66
958	1686.17
959	1783.16
960	1790.79
961	1612.79
962	1825.62
963	1982.57
964	2037.42
965	1564.23
966	2019.61
967	2031.23
968	1857.07
969	1678.86
970	1890.16
971	1821.23
972	1629.96
973	1744.43
974	1741.73
975	1899.7
976	1815.62
977	1668.92
978	1963.59
979	1966.98
980	1813.24
981	1880.84
982	1848.73
983	1813.72
984	1554.56
985	1965.28
986	1655.22
987	1759.9
988	1899.01
989	1973.24
990	1594.24
991	1741.93
992	1595.72
993	1977.14
994	1768.27
995	1705.49
996	1493.15
997	1614.06
998	1721.27
999	2018.92
1000	1781.28
1001	1752.73
1002	1829.63
1003	1777.73
1004	1818.56
1005	1893.75
1006	1808.36
1007	1892.57
1008	1778.9
1009	1716.6
1010	1952.28
1011	1846.29
1012	1683.04
1013	1676.24
1014	2068.72
1015	1847.77
1016	1453.11
1017	1757.63
1018	1947.26
1019	1852.51
1020	1708.91
1021	1831.84
1022	1492.45
1023	1900.94
1024	1939.67
1025	1706.22
1026	1834.93
1027	2036.77
1028	1734.43
1029	1902.62
1030	1810.89
1031	1828.58
1032	2174.31
1033	2005.95
1034	1682.49
1035	1652.7
1036	1604.15
1037	1867
1038	2032.99
1039	1708.55
1040	1742.23
1041	1921.21
1042	1898
1043	1931.68
1044	1888.13
1045	1787.66
1046	1750.18
1047	1718.43
1048	1802.36
1049	1686.76
1050	1807.54
1051	1718.5
1052	1656.29
1053	1851.09
1054	1919.21
1055	2130.1
1056	1964.57
1057	1619.13
1058	1898.24
1059	1526.6
1060	1769.69
1061	1785.47
1062	1830.42
1063	1888.73
1064	1887.31
1065	1759.67
1066	1900.22
1067	1788.02
1068	1720.92
1069	1775.08
1070	1534.7
1071	1915.59
1072	1807.91
1073	1980.56
1074	1786.45
1075	1447.65
1076	1930.38
1077	1797.87
1078	2001.08
1079	1860.91
1080	1636.86
1081	1654.35
1082	1860.84
1083	1925.98
1084	1784.36
1085	1782.66
1086	1774.3
1087	1680.16
1088	1956.22
1089	1730.57
1090	1683.72
1091	1637.52
1092	1950.69
1093	1726.44
1094	1698.31
1095	1741.01
1096	1678.4
1097	1753.89
1098	1727.02
1099	1710.89
1100	1761.44
1101	1915.63
1102	1536.03
1103	1808.9
1104	1606.57
1105	1290.15
1106	1763.68
1107	1903.95
1108	1932.96
1109	1918.35
1110	1846.32
1111	1618.38
1112	1946.59
1113	1638.35
1114	1757.77
1115	1796.92
1116	1645.32
1117	1734.16
1118	1637.31
1119	2097.76
1120	1649.21
1121	1779.12
1122	1724.92
1123	1737.38
1124	1748.73
1125	1824.75
1126	1920.32
1127	1506.42
1128	1822.21
1129	1831.32
1130	1706.59
1131	1497.09
1132	2075.17
1133	1711.2
1134	1909.74
1135	1779.78
1136	1907.04
1137	1748.16
1138	1781.78
1139	1843.89
1140	1851.77
1141	1890.18
1142	1685.87
1143	1872.45
1144	1761.76
1145	1559.22
1146	1787.92
1147	1921.56
1148	1891.87
1149	1857.99
1150	1876.25
1151	1815.73
1152	1979.3
1153	1985.07
1154	1717.64
1155	1697.21
1156	1734.54
1157	1734.18
1158	1590.68
1159	1774.31
1160	1840.32
1161	1818.34
1162	2022.8
1163	1803.68
1164	1803.54
1165	1836.27
1166	1691.68
1167	1876.22
1168	2003.47
1169	1934.65
1170	1983.04
1171	1804.81
1172	1623.74
1173	1543.14
1174	1863.38
1175	1886.38
1176	1736.68
1177	1825.54
1178	1657.47
1179	1720.19
1180	1988.44
1181	1905.12
1182	1654.29
1183	1836.25
1184	1493.27
1185	1841.59
1186	1856.57
1187	1651.85
1188	1560.25
1189	1961.82
1190	2014.03
1191	1778.65
1192	1721.94
1193	1613.37
1194	1867.77
1195	1747.59
1196	1598.17
1197	1733.97
1198	1898.22
1199	1763.47
1200	1830.79
1201	1681.74
1202	1735.92
1203	1926.07
1204	1786.1
1205	1889.12
1206	1894.7
1207	1810.55
1208	1917.9
1209	1859.37
1210	1659.02
1211	1956.57
1212	1713.88
1213	1516.5
1214	1894.04
1215	1691.2
1216	2021.15
1217	1593.06
1218	1525.44
1219	1690.02
1220	1706.93
1221	1803.98
1222	1915.07
1223	1932.33
1224	1666.43
1225	1775.36
1226	1693.06
1227	1934.25
1228	1964.59
1229	1865.48
1230	1581.56
1231	1770.87
1232	1934.36
1233	1812.44
1234	1787.73
1235	1817.27
1236	1981.37
1237	1832.93
1238	1590.55
1239	1546.63
1240	1762.08
1241	1938.01
1242	1872.25
1243	1809.7
1244	1662.35
1245	1886.78
1246	1711.76
1247	1663.59
1248	1786.43
1249	1702.46
1250	1760.81
1251	1976.66
1252	1681.62
1253	1590.22
1254	1688.1
1255	1818.2
1256	2072.72
1257	1894.63
1258	1791.54
1259	1865.92
1260	1915.11
1261	1866.84
1262	1673.77
1263	2039.28
1264	1639.46
1265	1786.72
1266	1601.69
1267	1848.93
1268	1770.49
1269	1759.56
1270	1949.45
1271	1660.9
1272	2062.71
1273	1929.06
1274	1815.5
1275	1710.11
1276	1924.25
1277	1844.89
1278	1771.66
1279	2008.23
1280	1948.59
1281	1731.96
1282	1992.41
1283	1742.74
1284	1561.84
1285	1742.17
1286	1847.12
1287	1792
1288	1682.86
1289	1568.7
1290	1876.3
1291	1758.6
1292	1758.81
1293	1573.68
1294	1944.87
1295	1770.39
1296	1985.29
1297	1665.8
1298	1929.92
1299	1676.49
1300	1522.97
1301	1768.34
1302	1768.85
1303	1870.94
1304	1826.29
1305	1966.24
1306	1811.84
1307	1782.31
1308	1538.92
1309	1715.63
1310	1802.57
1311	1832.77
1312	1580.7
1313	1949.13
1314	1918.43
1315	1636.51
1316	1517.46
1317	1857.25
1318	1790.84
1319	1785.58
1320	1602.29
1321	2104
1322	1690.32
1323	1809.1
1324	1670.39
1325	1468.6
1326	1703.43
1327	1859.63
1328	1669.92
1329	1712.31
1330	1757.66
1331	1919.3
1332	1841.92
1333	1895.19
1334	1889.55
1335	1718.39
1336	2014.57
1337	1894.27
1338	1568.28
1339	1916.28
1340	1617.24
1341	1958.35
1342	1823.74
1343	1829.01
1344	1880.03
1345	1945.5
1346	1742.2
1347	1683.58
1348	1989.82
1349	1902.27
1350	1538.22
1351	1800.38
1352	1779.37
1353	1662.64
1354	1710.4
1355	1899.23
1356	2104.85
1357	1951.55
1358	1713.44
1359	1766.02
1360	1753.34
1361	1803.38
1362	1774.71
1363	1709.16
1364	1765.38
1365	1715.76
1366	1981.26
1367	1886.48
1368	1910.28
1369	1780.47
1370	1757.84
1371	1898.63
1372	1605.88
1373	2054.57
1374	1983.15
1375	2054.27
1376	1819.4
1377	1909.38
1378	1582.27
1379	1631.06
1380	1785.19
1381	1644.05
1382	1720.19
1383	1827.06
1384	1802.85
1385	1745.81
1386	1520.93
1387	1719.38
1388	1626.05
1389	1803.29
1390	1684.8
1391	1940.15
1392	1781.44
1393	1881.35
1394	1815.02
1395	1868.41
1396	1598.79
1397	1880.16
1398	1743.52
1399	1613.26
1400	1832.67
1401	1615.94
1402	1965.25
1403	1632.64
1404	1892.05
1405	1978.65
1406	1873.59
1407	1535.17
1408	1679.74
1409	1973.14
1410	1876.02
1411	1999.64
1412	1887.17
1413	1939.07
1414	1888.08
1415	1745.3
1416	1871.7
1417	1838.69
1418	2026.48
1419	1920.92
1420	1648.17
1421	1976.02
1422	1822.95
1423	1848.59
1424	1818.88
1425	1915.34
1426	1879.25
1427	1687.44
1428	1633.19
1429	1791.87
1430	1963.51
1431	1996.44
1432	1775.47
1433	1832.24
1434	1942.18
1435	1772.1
1436	1781.03
1437	1816.57
1438	1790.13
1439	1807.64
1440	1908.6
1441	1803.71
1442	1866.73
1443	1900.09
1444	1476.19
1445	1813.05
1446	1850.25
1447	2095.1
1448	1887.72
1449	1725.21
1450	1641.78
1451	2013.19
1452	1783.95
1453	1489.8
1454	1871.82
1455	1733.96
1456	2017.67
1457	1811.91
1458	1718.96
1459	1544.1
1460	1762.89
1461	1591.45
1462	1579.71
1463	2010.42
1464	1798.88
1465	1679.04
1466	1849.01
1467	1775.38
1468	1948.45
1469	1513.23
1470	1910.8
1471	1915.14
1472	1822.29
1473	1777.18
1474	1704.6
1475	1753.12
1476	1880.99
1477	1771.34
1478	1664.84
1479	1737.51
1480	1877.93
1481	1888.95
1482	1610.54
1483	1759.87
1484	1832.94
1485	1848.38
1486	1746.98
1487	2010.35
1488	1722.63
1489	1758.51
1490	1827.65
1491	1890.21
1492	1732.6
1493	1836.24
1494	1671.57
1495	1810.84
1496	1952.92
1497	1904.9
1498	1814.32
1499	2127.19
1500	1755.26

## Sheet: National Museum
0	1596.03
1	1858.12
2	1439.31
3	1715.93
4	1575.33
5	1499.92
6	1431.25
7	1567.79
8	1624.5
9	1582.55
10	1615.99
11	1614.12
12	1532.1
13	1711.8
14	1483.26
15	1275.96
16	1350.34
17	1783.97
18	1494.53
19	1426.08
20	1441.74
21	1453.65
22	1487.66
23	1486.55
24	1522.39
25	1742.49
26	1559.5
27	1715.12
28	1649.4
29	1593.35
30	1474.31
31	1490.65
32	1519.65
33	1387.36
34	1827.07
35	1677.59
36	1462.5
37	1423.82
38	1530.43
39	1647.38
40	1515.19
41	1383.78
42	1432.17
43	1546.38
44	1700.09
45	1543.61
46	1669.06
47	1482.55
48	1546.58
49	1567.98
50	1338.39
51	1256.81
52	1601.6
53	1530.21
54	1700.64
55	1541.69
56	1498.78
57	1480.94
58	1634.15
59	1614.76
60	1661.02
61	1802.73
62	1628.73
63	1329.05
64	1567.26
65	1743.67
66	1421.33
67	1546.87
68	1356.56
69	1598.46
70	1487.78
71	1349.03
72	1622.29
73	1824.92
74	1633.16
75	1527.39
76	1949.16
77	1463.62
78	1693.67
79	1648.85
80	1647.76
81	1560.12
82	1374.98
83	1637.28
84	1579.7
85	1368.41
86	1913.45
87	1754.57
88	1557.37
89	1404.69
90	1472.38
91	1512.92
92	1551.33
93	1441.95
94	1437.97
95	1487.05
96	1436.79
97	1703.07
98	1435.39
99	1633.79
100	1831.14
101	1430.63
102	1617.78
103	1473.29
104	1521.7
105	1375.54
106	1779.66
107	1565.11
108	1536.16
109	1553.95
110	1533.49
111	1416.76
112	1537.64
113	1689.06
114	1828.34
115	1561.89
116	1240.65
117	1737.23
118	1536.56
119	1727.86
120	1676.79
121	1535.48
122	1446.31
123	1731.36
124	1447.96
125	1471.06
126	1681.26
127	1602.61
128	1348.09
129	1529.15
130	1534.39
131	1534.75
132	1599.4
133	1371.78
134	1496.88
135	1372.08
136	1650.24
137	1706.04
138	1526.32
139	1599.6
140	1640.75
141	1613.51
142	1627.11
143	1524.56
144	1605.12
145	1386.48
146	1614.95
147	1709.01
148	1527.21
149	1551.32
150	1801.57
151	1524.38
152	1573.25
153	1647.56
154	1437.5
155	1586.42
156	1698.43
157	1604.97
158	1576.96
159	1341.44
160	1404.81
161	1285.77
162	1421.16
163	1591.94
164	1541.34
165	1424.61
166	1862.12
167	1473.9
168	1559.06
169	1550.38
170	1572.76
171	1662.55
172	1256.73
173	1351.34
174	1331.55
175	1599.95
176	1548.12
177	1547.61
178	1558.22
179	1695.09
180	1501.32
181	1338.82
182	1413.78
183	1401.57
184	1376.34
185	1559.68
186	1347.59
187	1514.45
188	1724.84
189	1388.33
190	1500.15
191	1420.98
192	1401.79
193	1732.82
194	1463.13
195	1390.11
196	1399.16
197	1449.85
198	1573.6
199	1436.87
200	1692.94
201	1515.19
202	1587.19
203	1389.57
204	1482.12
205	1589.67
206	1440.14
207	1446.08
208	1534.63
209	1541.6
210	1379.1
211	1573.39
212	1716.66
213	1766.73
214	1334.78
215	1750.47
216	1761.09
217	1602.1
218	1439.41
219	1632.3
220	1569.38
221	1394.77
222	1499.27
223	1496.81
224	1641.01
225	1564.26
226	1430.34
227	1699.33
228	1702.43
229	1562.09
230	1623.79
231	1594.48
232	1562.52
233	1325.94
234	1700.88
235	1417.83
236	1513.4
237	1640.38
238	1708.14
239	1362.16
240	1496.99
241	1363.52
242	1711.7
243	1521.03
244	1463.72
245	1269.89
246	1380.26
247	1478.13
248	1749.84
249	1532.91
250	1506.85
251	1577.05
252	1529.67
253	1566.95
254	1635.58
255	1557.63
256	1634.51
257	1530.74
258	1473.87
259	1689.01
260	1592.25
261	1443.23
262	1437.02
263	1795.31
264	1593.61
265	1233.33
266	1511.32
267	1684.43
268	1597.94
269	1466.85
270	1579.07
271	1269.25
272	1642.14
273	1677.5
274	1464.39
275	1581.89
276	1766.14
277	1490.14
278	1643.68
279	1559.94
280	1576.09
281	1891.7
282	1738.01
283	1442.73
284	1415.53
285	1371.22
286	1611.16
287	1762.69
288	1466.51
289	1497.26
290	1660.64
291	1639.46
292	1670.21
293	1630.45
294	1538.74
295	1504.52
296	1475.54
297	1552.15
298	1446.63
299	1556.88
300	1475.6
301	1418.81
302	1596.63
303	1658.82
304	1851.34
305	1700.23
306	1384.89
307	1639.68
308	1300.42
309	1522.33
310	1536.73
311	1577.77
312	1631
313	1629.7
314	1513.18
315	1641.48
316	1539.06
317	1477.81
318	1527.26
319	1307.82
320	1655.52
321	1557.22
322	1714.83
323	1537.63
324	1228.35
325	1669.02
326	1548.05
327	1733.56
328	1605.6
329	1401.08
330	1417.04
331	1605.54
332	1665
333	1535.72
334	1534.17
335	1526.54
336	1440.6
337	1692.6
338	1486.62
339	1443.85
340	1401.68
341	1687.56
342	1482.85
343	1457.17
344	1496.15
345	1438.99
346	1507.91
347	1483.38
348	1468.65
349	1514.8
350	1655.55
351	1309.03
352	1558.12
353	1373.42
354	1084.57
355	1516.84
356	1644.89
357	1671.38
358	1658.04
359	1592.29
360	1384.21
361	1683.82
362	1402.43
363	1511.45
364	1547.19
365	1408.8
366	1489.9
367	1401.48
368	1821.81
369	1412.34
370	1530.94
371	1481.46
372	1492.84
373	1503.2
374	1572.6
375	1659.84
376	1282
377	1570.28
378	1578.59
379	1464.73
380	1273.48
381	1801.2
382	1468.93
383	1650.18
384	1531.54
385	1647.72
386	1502.68
387	1533.37
388	1590.07
389	1597.25
390	1632.32
391	1445.81
392	1616.13
393	1515.09
394	1330.2
395	1538.97
396	1660.97
397	1633.87
398	1602.94
399	1619.61
400	1564.36
401	1713.68
402	1718.95
403	1474.81
404	1456.16
405	1490.25
406	1489.91
407	1358.92
408	1526.55
409	1586.81
410	1566.74
411	1753.39
412	1553.36
413	1553.23
414	1583.11
415	1451.11
416	1619.58
417	1735.74
418	1672.92
419	1717.09
420	1554.39
421	1389.1
422	1315.52
423	1607.85
424	1628.86
425	1492.19
426	1573.32
427	1419.89
428	1477.14
429	1722.02
430	1645.96
431	1416.99
432	1583.09
433	1270
434	1587.96
435	1601.64
436	1414.76
437	1331.13
438	1697.72
439	1745.38
440	1530.51
441	1478.74
442	1379.63
443	1611.87
444	1502.15
445	1365.75
446	1489.72
447	1639.67
448	1516.65
449	1578.11
450	1442.04
451	1491.51
452	1665.08
453	1537.31
454	1631.35
455	1636.45
456	1559.63
457	1657.63
458	1604.2
459	1421.3
460	1692.93
461	1471.38
462	1291.2
463	1635.85
464	1450.68
465	1751.88
466	1361.09
467	1299.36
468	1449.6
469	1465.03
470	1553.63
471	1655.05
472	1670.8
473	1428.07
474	1527.51
475	1452.38
476	1672.55
477	1700.25
478	1609.77
479	1350.59
480	1523.41
481	1672.65
482	1561.35
483	1538.8
484	1565.77
485	1715.57
486	1580.06
487	1358.8
488	1318.71
489	1515.38
490	1675.98
491	1615.95
492	1558.86
493	1424.34
494	1629.22
495	1469.45
496	1425.48
497	1537.61
498	1460.96
499	1514.22
500	1711.27
501	1441.94
502	1358.5
503	1447.85
504	1566.61
505	1798.96
506	1636.38
507	1542.28
508	1610.17
509	1655.08
510	1611.01
511	1434.76
512	1768.43
513	1403.45
514	1537.87
515	1368.97
516	1594.66
517	1523.06
518	1513.08
519	1686.42
520	1423.02
521	1789.82
522	1667.82
523	1564.15
524	1467.94
525	1663.43
526	1590.98
527	1524.13
528	1740.09
529	1685.64
530	1487.89
531	1725.65
532	1497.73
533	1332.59
534	1497.21
535	1593.01
536	1542.69
537	1443.07
538	1338.86
539	1619.66
540	1512.2
541	1512.4
542	1343.4
543	1682.25
544	1522.97
545	1719.14
546	1427.49
547	1668.6
548	1437.25
549	1297.1
550	1521.1
551	1521.56
552	1614.76
553	1574
554	1701.75
555	1560.81
556	1533.85
557	1311.67
558	1472.98
559	1552.35
560	1579.91
561	1349.81
562	1686.13
563	1658.11
564	1400.76
565	1292.08
566	1602.26
567	1541.64
568	1536.84
569	1369.52
570	1827.51
571	1449.88
572	1558.31
573	1431.68
574	1247.48
575	1461.84
576	1604.43
577	1431.26
578	1469.95
579	1511.35
580	1658.91
581	1588.27
582	1636.89
583	1631.75
584	1475.5
585	1745.88
586	1636.06
587	1338.47
588	1656.15
589	1383.16
590	1694.55
591	1571.67
592	1576.48
593	1623.06
594	1682.82
595	1497.24
596	1443.72
597	1723.28
598	1643.36
599	1311.02
600	1550.35
601	1531.17
602	1424.61
603	1468.21
604	1640.58
605	1828.29
606	1688.35
607	1470.98
608	1518.98
609	1507.41
610	1553.08
611	1526.91
612	1467.08
613	1518.4
614	1473.1
615	1715.46
616	1628.94
617	1650.67
618	1532.18
619	1511.52
620	1640.04
621	1372.79
622	1782.39
623	1717.19
624	1782.12
625	1567.71
626	1649.85
627	1351.24
628	1395.78
629	1536.48
630	1407.64
631	1477.14
632	1574.71
633	1552.6
634	1500.53
635	1295.25
636	1476.4
637	1391.21
638	1553.01
639	1444.84
640	1677.94
641	1533.05
642	1624.26
643	1563.71
644	1612.45
645	1366.32
646	1623.17
647	1498.44
648	1379.53
649	1579.83
650	1381.97
651	1700.85
652	1397.22
653	1634.03
654	1713.08
655	1617.18
656	1308.25
657	1440.22
658	1708.06
659	1619.4
660	1732.25
661	1629.57
662	1676.95
663	1630.41
664	1500.07
665	1615.45
666	1585.32
667	1756.75
668	1660.38
669	1411.4
670	1710.69
671	1570.95
672	1594.35
673	1567.23
674	1655.29
675	1622.34
676	1447.25
677	1397.73
678	1542.58
679	1699.26
680	1729.32
681	1527.61
682	1579.43
683	1679.79
684	1524.53
685	1532.69
686	1565.12
687	1540.99
688	1556.98
689	1649.14
690	1553.39
691	1610.92
692	1641.37
693	1254.4
694	1561.92
695	1595.87
696	1819.39
697	1630.07
698	1481.73
699	1405.57
700	1744.62
701	1535.35
702	1266.83
703	1615.56
704	1489.71
705	1748.7
706	1560.87
707	1476.02
708	1316.4
709	1516.12
710	1359.62
711	1348.91
712	1742.08
713	1548.98
714	1439.58
715	1594.74
716	1527.52
717	1685.51
718	1288.21
719	1651.14
720	1655.11
721	1570.35
722	1529.17
723	1462.91
724	1507.21
725	1623.93
726	1523.84
727	1426.61
728	1492.95
729	1621.14
730	1631.2
731	1377.05
732	1513.37
733	1580.07
734	1594.16
735	1501.6
736	1742.02
737	1479.38
738	1512.12
739	1575.24
740	1632.35
741	1488.47
742	1583.08
743	1432.76
744	1559.9
745	1689.59
746	1645.76
747	1563.08
748	1848.68
749	1509.16
750	1451.73
751	1574.21
752	1480.96
753	1510.48
754	1659.93
755	1303.37
756	1686.72
757	1151.11
758	1466.53
759	1774.41
760	1539.37
761	1446.39
762	1661.74
763	1593.81
764	1570.68
765	1582.83
766	1596.36
767	1724.89
768	1608.31
769	2033.56
770	1648.08
771	1734.17
772	1407.82
773	1576.45
774	1505.57
775	1563.6
776	1478.57
777	1444
778	1726.8
779	1714.32
780	1565.86
781	1579.18
782	1662.63
783	1635.7
784	1487.57
785	1243.51
786	1520.46
787	1381.92
788	1475.52
789	2059.15
790	1427.37
791	1372.53
792	1555.06
793	1308.91
794	1431.27
795	1607.4
796	1595.43
797	1665.62
798	1318.62
799	1744.86
800	1635.51
801	1828.27
802	1453.71
803	1467.31
804	1383.11
805	1560.25
806	1276.16
807	1623.78
808	1502.63
809	1518.9
810	1556.66
811	1642.46
812	1330.67
813	1590.58
814	1576.44
815	1469.37
816	1513.73
817	1383.82
818	1574.91
819	1420
820	1530.19
821	1402.92
822	1541.93
823	1356.69
824	1503.9
825	1700.33
826	1617.79
827	1604.64
828	1511.27
829	1706.25
830	1678.84
831	1705.76
832	1530.74
833	1653.66
834	1732.84
835	1520.5
836	1457.33
837	1693.68
838	1616.81
839	1583.27
840	1397.97
841	1512.48
842	1679.3
843	1495.64
844	1590.45
845	1565.75
846	1657.28
847	1394.05
848	1682.48
849	1600.35
850	1561.58
851	1574.11
852	1422.41
853	1537.35
854	1475.05
855	1613.42
856	1492.24
857	1718.34
858	1585.74
859	1567.67
860	1445.97
861	1720.75
862	1700.88
863	1546.04
864	1599.43
865	1839.65
866	1540.09
867	1492.68
868	1499.89
869	1770.24
870	1577.21
871	1585.03
872	1606.36
873	1602.66
874	1306.22
875	1357.25
876	1511.35
877	1592.17
878	1504.37
879	1447.54
880	1343.57
881	1580.42
882	1867.46
883	1557.88
884	1374.97
885	1537.56
886	1527.47
887	1595.34
888	1710.65
889	1569.35
890	1613.61
891	1526.67
892	1485.45
893	1448.52
894	1741.31
895	1672.7
896	1457.33
897	1389.51
898	1768.21
899	1375.66
900	1514.42
901	1507.35
902	1634.4
903	1665.54
904	1627.02
905	1418.51
906	1642.46
907	1439.34
908	1534.93
909	1734.91
910	1623.46
911	1408.53
912	1615.12
913	1632.83
914	1427.49
915	1530.01
916	1664.12
917	1697.55
918	1512.46
919	1662.67
920	1739.32
921	1227.58
922	1422.07
923	1522.7
924	1381.5
925	1382.25
926	1410.29
927	1564.94
928	1463.42
929	1467.15
930	1540.75
931	1863.82
932	1713.14
933	1523.63
934	1647.63
935	1694.18
936	1592.74
937	1400.33
938	1860.04
939	1482.93
940	1584.47
941	1606.13
942	1609.22
943	1440.29
944	1583.67
945	1607.38
946	1438.03
947	1544.93
948	1604.65
949	1480.7
950	1430.56
951	1508.6
952	1598.69
953	1385.43
954	1424.89
955	1406.4
956	1707.81
957	1598.64
958	1652.48
959	1708.52
960	1391.58
961	1489.93
962	1667.77
963	1498.28
964	1855.7
965	1456.3
966	1218.03
967	1475.92
968	1894.84
969	1742.35
970	1478.26
971	1844.46
972	1616.97
973	1627.56
974	1573.14
975	1717.64
976	1516.22
977	1437.52
978	1530.69
979	1442.6
980	1569.9
981	1639.22
982	1467.62
983	1284.64
984	1967.59
985	1459.32
986	1453.88
987	1328.56
988	1740.97
989	1237.55
990	1672.67
991	1596.09
992	1725.72
993	1525.6
994	1652.32
995	1589.36
996	1581.15
997	1496.24
998	1542.96
999	1357.06
1000	1623.66
1001	1596.03
1002	1858.12
1003	1439.31
1004	1715.93
1005	1575.33
1006	1499.92
1007	1431.25
1008	1567.79
1009	1624.5
1010	1582.55
1011	1615.99
1012	1614.12
1013	1532.1
1014	1711.8
1015	1483.26
1016	1275.96
1017	1350.34
1018	1783.97
1019	1494.53
1020	1426.08
1021	1441.74
1022	1453.65
1023	1487.66
1024	1486.55
1025	1522.39
1026	1742.49
1027	1559.5
1028	1715.12
1029	1649.4
1030	1593.35
1031	1474.31
1032	1490.65
1033	1519.65
1034	1387.36
1035	1827.07
1036	1677.59
1037	1462.5
1038	1423.82
1039	1530.43
1040	1647.38
1041	1515.19
1042	1383.78
1043	1432.17
1044	1546.38
1045	1700.09
1046	1543.61
1047	1669.06
1048	1482.55
1049	1546.58
1050	1567.98
1051	1338.39
1052	1256.81
1053	1601.6
1054	1530.21
1055	1700.64
1056	1541.69
1057	1498.78
1058	1480.94
1059	1634.15
1060	1614.76
1061	1661.02
1062	1802.73
1063	1628.73
1064	1329.05
1065	1567.26
1066	1743.67
1067	1421.33
1068	1546.87
1069	1356.56
1070	1598.46
1071	1487.78
1072	1349.03
1073	1622.29
1074	1824.92
1075	1633.16
1076	1527.39
1077	1949.16
1078	1463.62
1079	1693.67
1080	1648.85
1081	1647.76
1082	1560.12
1083	1374.98
1084	1637.28
1085	1579.7
1086	1368.41
1087	1913.45
1088	1754.57
1089	1557.37
1090	1404.69
1091	1472.38
1092	1512.92
1093	1551.33
1094	1441.95
1095	1437.97
1096	1487.05
1097	1436.79
1098	1703.07
1099	1435.39
1100	1633.79
1101	1831.14
1102	1430.63
1103	1617.78
1104	1473.29
1105	1521.7
1106	1375.54
1107	1779.66
1108	1565.11
1109	1536.16
1110	1553.95
1111	1533.49
1112	1416.76
1113	1537.64
1114	1689.06
1115	1828.34
1116	1561.89
1117	1240.65
1118	1737.23
1119	1536.56
1120	1727.86
1121	1676.79
1122	1535.48
1123	1446.31
1124	1731.36
1125	1447.96
1126	1471.06
1127	1681.26
1128	1602.61
1129	1348.09
1130	1529.15
1131	1534.39
1132	1534.75
1133	1599.4
1134	1371.78
1135	1496.88
1136	1372.08
1137	1650.24
1138	1706.04
1139	1526.32
1140	1599.6
1141	1640.75
1142	1613.51
1143	1627.11
1144	1524.56
1145	1605.12
1146	1386.48
1147	1614.95
1148	1709.01
1149	1527.21
1150	1551.32
1151	1801.57
1152	1524.38
1153	1573.25
1154	1647.56
1155	1437.5
1156	1586.42
1157	1698.43
1158	1604.97
1159	1576.96
1160	1341.44
1161	1404.81
1162	1285.77
1163	1421.16
1164	1591.94
1165	1541.34
1166	1424.61
1167	1862.12
1168	1473.9
1169	1559.06
1170	1550.38
1171	1572.76
1172	1662.55
1173	1256.73
1174	1351.34
1175	1331.55
1176	1599.95
1177	1548.12
1178	1547.61
1179	1558.22
1180	1695.09
1181	1501.32
1182	1338.82
1183	1413.78
1184	1401.57
1185	1376.34
1186	1559.68
1187	1347.59
1188	1514.45
1189	1724.84
1190	1388.33
1191	1500.15
1192	1420.98
1193	1401.79
1194	1732.82
1195	1463.13
1196	1390.11
1197	1399.16
1198	1449.85
1199	1573.6
1200	1436.87
1201	1692.94
1202	1515.19
1203	1587.19
1204	1389.57
1205	1482.12
1206	1589.67
1207	1440.14
1208	1446.08
1209	1534.63
1210	1541.6
1211	1379.1
1212	1573.39
1213	1716.66
1214	1766.73
1215	1334.78
1216	1750.47
1217	1761.09
1218	1602.1
1219	1439.41
1220	1632.3
1221	1569.38
1222	1394.77
1223	1499.27
1224	1496.81
1225	1641.01
1226	1564.26
1227	1430.34
1228	1699.33
1229	1702.43
1230	1562.09
1231	1623.79
1232	1594.48
1233	1562.52
1234	1325.94
1235	1700.88
1236	1417.83
1237	1513.4
1238	1640.38
1239	1708.14
1240	1362.16
1241	1496.99
1242	1363.52
1243	1711.7
1244	1521.03
1245	1463.72
1246	1269.89
1247	1380.26
1248	1478.13
1249	1749.84
1250	1532.91
1251	1506.85
1252	1577.05
1253	1529.67
1254	1566.95
1255	1635.58
1256	1557.63
1257	1634.51
1258	1530.74
1259	1473.87
1260	1689.01
1261	1592.25
1262	1443.23
1263	1437.02
1264	1795.31
1265	1593.61
1266	1233.33
1267	1511.32
1268	1684.43
1269	1597.94
1270	1466.85
1271	1579.07
1272	1269.25
1273	1642.14
1274	1677.5
1275	1464.39
1276	1581.89
1277	1766.14
1278	1490.14
1279	1643.68
1280	1559.94
1281	1576.09
1282	1891.7
1283	1738.01
1284	1442.73
1285	1415.53
1286	1371.22
1287	1611.16
1288	1762.69
1289	1466.51
1290	1497.26
1291	1660.64
1292	1639.46
1293	1670.21
1294	1630.45
1295	1538.74
1296	1504.52
1297	1475.54
1298	1552.15
1299	1446.63
1300	1556.88
1301	1475.6
1302	1418.81
1303	1596.63
1304	1658.82
1305	1851.34
1306	1700.23
1307	1384.89
1308	1639.68
1309	1300.42
1310	1522.33
1311	1536.73
1312	1577.77
1313	1631
1314	1629.7
1315	1513.18
1316	1641.48
1317	1539.06
1318	1477.81
1319	1527.26
1320	1307.82
1321	1655.52
1322	1557.22
1323	1714.83
1324	1537.63
1325	1228.35
1326	1669.02
1327	1548.05
1328	1733.56
1329	1605.6
1330	1401.08
1331	1417.04
1332	1605.54
1333	1665
1334	1535.72
1335	1534.17
1336	1526.54
1337	1440.6
1338	1692.6
1339	1486.62
1340	1443.85
1341	1401.68
1342	1687.56
1343	1482.85
1344	1457.17
1345	1496.15
1346	1438.99
1347	1507.91
1348	1483.38
1349	1468.65
1350	1514.8
1351	1655.55
1352	1309.03
1353	1558.12
1354	1373.42
1355	1084.57
1356	1516.84
1357	1644.89
1358	1671.38
1359	1658.04
1360	1592.29
1361	1384.21
1362	1683.82
1363	1402.43
1364	1511.45
1365	1547.19
1366	1408.8
1367	1489.9
1368	1401.48
1369	1821.81
1370	1412.34
1371	1530.94
1372	1481.46
1373	1492.84
1374	1503.2
1375	1572.6
1376	1659.84
1377	1282
1378	1570.28
1379	1578.59
1380	1464.73
1381	1273.48
1382	1801.2
1383	1468.93
1384	1650.18
1385	1531.54
1386	1647.72
1387	1502.68
1388	1533.37
1389	1590.07
1390	1597.25
1391	1632.32
1392	1445.81
1393	1616.13
1394	1515.09
1395	1330.2
1396	1538.97
1397	1660.97
1398	1633.87
1399	1602.94
1400	1619.61
1401	1564.36
1402	1713.68
1403	1718.95
1404	1474.81
1405	1456.16
1406	1490.25
1407	1489.91
1408	1358.92
1409	1526.55
1410	1586.81
1411	1566.74
1412	1753.39
1413	1553.36
1414	1553.23
1415	1583.11
1416	1451.11
1417	1619.58
1418	1735.74
1419	1672.92
1420	1717.09
1421	1554.39
1422	1389.1
1423	1315.52
1424	1607.85
1425	1628.86
1426	1492.19
1427	1573.32
1428	1419.89
1429	1477.14
1430	1722.02
1431	1645.96
1432	1416.99
1433	1583.09
1434	1270
1435	1587.96
1436	1601.64
1437	1414.76
1438	1331.13
1439	1697.72
1440	1745.38
1441	1530.51
1442	1478.74
1443	1379.63
1444	1611.87
1445	1502.15
1446	1365.75
1447	1489.72
1448	1639.67
1449	1516.65
1450	1578.11
1451	1442.04
1452	1491.51
1453	1665.08
1454	1537.31
1455	1631.35
1456	1636.45
1457	1559.63
1458	1657.63
1459	1604.2
1460	1421.3
1461	1692.93
1462	1471.38
1463	1291.2
1464	1635.85
1465	1450.68
1466	1751.88
1467	1361.09
1468	1299.36
1469	1449.6
1470	1465.03
1471	1553.63
1472	1655.05
1473	1670.8
1474	1428.07
1475	1527.51
1476	1452.38
1477	1672.55
1478	1700.25
1479	1609.77
1480	1350.59
1481	1523.41
1482	1672.65
1483	1561.35
1484	1538.8
1485	1565.77
1486	1715.57
1487	1580.06
1488	1358.8
1489	1318.71
1490	1515.38
1491	1675.98
1492	1615.95
1493	1558.86
1494	1424.34
1495	1629.22
1496	1469.45
1497	1425.48
1498	1537.61
1499	1460.96
1500	1537.61

## Sheet: Jingshan park
0	1651.02
1	1941.55
2	1477.29
3	1783.94
4	1628.08
5	1544.49
6	1468.37
7	1619.72
8	1682.59
9	1636.08
10	1673.15
11	1671.08
12	1580.16
13	1779.36
14	1526.02
15	1296.22
16	1378.67
17	1859.36
18	1538.51
19	1462.63
20	1479.99
21	1493.2
22	1530.89
23	1529.66
24	1569.4
25	1813.37
26	1610.53
27	1783.04
28	1710.18
29	1648.05
30	1516.09
31	1534.21
32	1566.36
33	1419.71
34	1907.13
35	1741.44
36	1503
37	1460.13
38	1578.31
39	1707.95
40	1561.41
41	1415.74
42	1469.38
43	1595.98
44	1766.38
45	1592.92
46	1731.98
47	1525.23
48	1596.21
49	1619.93
50	1365.42
51	1274.99
52	1657.2
53	1578.07
54	1766.98
55	1590.79
56	1543.22
57	1523.44
58	1693.28
59	1671.78
60	1723.06
61	1880.16
62	1687.27
63	1355.07
64	1619.13
65	1814.69
66	1457.37
67	1596.53
68	1385.57
69	1653.72
70	1531.03
71	1377.22
72	1680.13
73	1904.75
74	1692.19
75	1574.94
76	2042.47
77	1504.25
78	1759.26
79	1709.58
80	1708.37
81	1611.22
82	1405.99
83	1696.75
84	1632.93
85	1398.71
86	2002.89
87	1826.77
88	1608.17
89	1438.92
90	1513.96
91	1558.9
92	1601.48
93	1480.23
94	1475.82
95	1530.22
96	1474.51
97	1769.68
98	1472.95
99	1692.88
100	1911.64
101	1467.67
102	1675.14
103	1514.97
104	1568.63
105	1406.61
106	1854.58
107	1616.75
108	1584.66
109	1604.38
110	1581.7
111	1452.3
112	1586.3
113	1754.16
114	1908.55
115	1613.18
116	1257.08
117	1807.54
118	1585.1
119	1797.16
120	1740.54
121	1583.91
122	1485.06
123	1801.04
124	1486.89
125	1512.49
126	1745.5
127	1658.32
128	1376.18
129	1576.89
130	1582.7
131	1583.09
132	1654.76
133	1402.44
134	1541.12
135	1402.78
136	1711.12
137	1772.97
138	1573.75
139	1654.98
140	1700.59
141	1670.4
142	1685.48
143	1571.8
144	1661.1
145	1418.74
146	1672
147	1776.26
148	1574.74
149	1601.46
150	1878.87
151	1571.6
152	1625.78
153	1708.15
154	1475.29
155	1640.37
156	1764.54
157	1660.94
158	1629.89
159	1368.81
160	1439.06
161	1307.1
162	1457.18
163	1646.49
164	1590.4
165	1461
166	1945.99
167	1515.65
168	1610.04
169	1600.42
170	1625.23
171	1724.76
172	1274.91
173	1379.79
174	1357.85
175	1655.37
176	1597.92
177	1597.35
178	1609.12
179	1760.83
180	1546.04
181	1365.9
182	1449
183	1435.46
184	1407.5
185	1610.73
186	1375.62
187	1560.6
188	1793.81
189	1420.79
190	1544.74
191	1456.98
192	1435.71
193	1802.66
194	1503.7
195	1422.76
196	1432.79
197	1488.98
198	1626.17
199	1474.6
200	1758.45
201	1561.41
202	1641.23
203	1422.16
204	1524.76
205	1643.97
206	1478.22
207	1484.81
208	1582.96
209	1590.68
210	1410.55
211	1625.93
212	1784.75
213	1840.25
214	1361.42
215	1822.23
216	1833.99
217	1657.76
218	1477.41
219	1691.24
220	1621.49
221	1427.93
222	1543.77
223	1541.04
224	1700.89
225	1615.81
226	1467.35
227	1765.54
228	1768.97
229	1613.4
230	1681.8
231	1649.31
232	1613.88
233	1351.63
234	1767.25
235	1453.49
236	1559.42
237	1700.19
238	1775.3
239	1391.78
240	1541.23
241	1393.29
242	1779.25
243	1567.89
244	1504.36
245	1289.49
246	1411.84
247	1520.34
248	1821.53
249	1581.06
250	1552.16
251	1629.98
252	1577.46
253	1618.79
254	1694.87
255	1608.46
256	1693.68
257	1578.64
258	1515.6
259	1754.1
260	1646.84
261	1481.64
262	1474.76
263	1871.93
264	1648.34
265	1248.97
266	1557.12
267	1749.02
268	1653.14
269	1507.83
270	1632.22
271	1288.78
272	1702.14
273	1741.33
274	1505.1
275	1635.35
276	1839.6
277	1533.65
278	1703.85
279	1611.02
280	1628.92
281	1978.77
282	1808.41
283	1481.09
284	1450.94
285	1401.82
286	1667.8
287	1835.77
288	1507.46
289	1541.54
290	1722.65
291	1699.16
292	1733.25
293	1689.19
294	1587.52
295	1549.59
296	1517.46
297	1602.39
298	1485.41
299	1607.63
300	1517.53
301	1454.58
302	1651.69
303	1720.63
304	1934.03
305	1766.53
306	1416.97
307	1699.42
308	1323.33
309	1569.33
310	1585.29
311	1630.78
312	1689.78
313	1688.35
314	1559.19
315	1701.41
316	1587.87
317	1519.98
318	1574.79
319	1331.54
320	1716.96
321	1608.01
322	1782.72
323	1586.28
324	1243.45
325	1731.94
326	1597.84
327	1803.48
328	1661.64
329	1434.92
330	1452.61
331	1661.57
332	1727.48
333	1584.17
334	1582.45
335	1573.99
336	1478.73
337	1758.08
338	1529.74
339	1482.33
340	1435.58
341	1752.48
342	1525.56
343	1497.1
344	1540.31
345	1476.95
346	1553.34
347	1526.15
348	1509.82
349	1560.98
350	1717.01
351	1332.88
352	1609.01
353	1404.26
354	1084.07
355	1563.25
356	1705.19
357	1734.55
358	1719.76
359	1646.88
360	1416.22
361	1748.34
362	1436.42
363	1557.27
364	1596.88
365	1443.48
366	1533.37
367	1435.37
368	1901.31
369	1447.41
370	1578.87
371	1524.03
372	1536.64
373	1548.12
374	1625.05
375	1721.75
376	1302.92
377	1622.48
378	1631.7
379	1505.48
380	1293.47
381	1878.46
382	1510.14
383	1711.05
384	1579.54
385	1708.32
386	1547.55
387	1581.57
388	1644.42
389	1652.38
390	1691.25
391	1484.51
392	1673.31
393	1561.3
394	1356.35
395	1587.77
396	1723.01
397	1692.97
398	1658.68
399	1677.16
400	1615.92
401	1781.44
402	1787.28
403	1516.65
404	1495.98
405	1533.76
406	1533.39
407	1388.18
408	1574
409	1640.8
410	1618.56
411	1825.46
412	1603.73
413	1603.58
414	1636.7
415	1490.38
416	1677.13
417	1805.89
418	1736.26
419	1785.22
420	1604.87
421	1421.64
422	1340.08
423	1664.13
424	1687.41
425	1535.92
426	1625.85
427	1455.77
428	1519.23
429	1790.69
430	1706.37
431	1452.55
432	1636.68
433	1289.62
434	1642.08
435	1657.25
436	1450.08
437	1357.39
438	1763.75
439	1816.58
440	1578.39
441	1521.01
442	1411.15
443	1668.58
444	1546.96
445	1395.76
446	1533.18
447	1699.4
448	1563.03
449	1631.16
450	1480.33
451	1535.16
452	1727.57
453	1585.94
454	1690.18
455	1695.83
456	1610.68
457	1719.31
458	1660.08
459	1457.33
460	1758.44
461	1512.85
462	1313.12
463	1695.16
464	1489.9
465	1823.78
466	1390.59
467	1322.17
468	1488.7
469	1505.81
470	1604.03
471	1716.44
472	1733.91
473	1464.84
474	1575.07
475	1491.78
476	1735.85
477	1766.55
478	1666.26
479	1378.96
480	1570.52
481	1735.96
482	1612.59
483	1587.58
484	1617.48
485	1783.54
486	1633.32
487	1388.06
488	1343.61
489	1561.63
490	1739.66
491	1673.11
492	1609.82
493	1460.7
494	1687.82
495	1510.71
496	1461.96
497	1586.27
498	1501.3
499	1560.34
500	1778.77
501	1480.21
502	1387.72
503	1486.76
504	1618.42
505	1875.97
506	1695.76
507	1591.44
508	1666.7
509	1716.48
510	1667.63
511	1472.26
512	1842.13
513	1437.54
514	1586.56
515	1399.32
516	1649.51
517	1570.14
518	1559.08
519	1751.23
520	1459.24
521	1865.84
522	1730.6
523	1615.68
524	1509.04
525	1725.73
526	1645.43
527	1571.32
528	1810.71
529	1750.36
530	1531.14
531	1794.71
532	1542.06
533	1359
534	1541.48
535	1647.68
536	1591.9
537	1481.46
538	1365.95
539	1677.21
540	1558.1
541	1558.32
542	1370.98
543	1746.6
544	1570.03
545	1787.5
546	1464.2
547	1731.47
548	1475.02
549	1319.66
550	1567.96
551	1568.48
552	1671.79
553	1626.6
554	1768.22
555	1611.98
556	1582.1
557	1335.81
558	1514.63
559	1602.6
560	1633.16
561	1378.09
562	1750.9
563	1719.84
564	1434.56
565	1314.09
566	1657.94
567	1590.73
568	1585.41
569	1399.93
570	1907.63
571	1489.01
572	1609.21
573	1468.84
574	1264.65
575	1502.28
576	1660.34
577	1468.37
578	1511.26
579	1557.16
580	1720.73
581	1642.42
582	1696.32
583	1690.62
584	1517.41
585	1817.13
586	1695.4
587	1365.51
588	1717.67
589	1415.06
590	1760.24
591	1624.02
592	1629.36
593	1680.98
594	1747.23
595	1541.51
596	1482.19
597	1792.09
598	1703.49
599	1335.09
600	1600.39
601	1579.12
602	1461
603	1509.33
604	1700.41
605	1908.49
606	1753.36
607	1512.41
608	1565.62
609	1552.79
610	1603.42
611	1574.41
612	1508.08
613	1564.97
614	1514.76
615	1783.42
616	1687.51
617	1711.6
618	1580.24
619	1557.34
620	1699.81
621	1403.56
622	1857.61
623	1785.33
624	1857.31
625	1619.63
626	1710.69
627	1379.67
628	1429.05
629	1585.01
630	1442.19
631	1519.24
632	1627.39
633	1602.88
634	1545.16
635	1317.6
636	1518.42
637	1423.98
638	1603.33
639	1483.43
640	1741.83
641	1581.22
642	1682.32
643	1615.2
644	1669.22
645	1396.39
646	1681.11
647	1542.85
648	1411.03
649	1633.06
650	1413.74
651	1767.22
652	1430.64
653	1693.15
654	1780.78
655	1674.47
656	1332.01
657	1478.31
658	1775.21
659	1676.93
660	1802.02
661	1688.21
662	1740.73
663	1689.13
664	1544.65
665	1672.56
666	1639.15
667	1829.19
668	1722.36
669	1446.36
670	1778.12
671	1623.22
672	1649.17
673	1619.1
674	1716.72
675	1680.19
676	1486.1
677	1431.2
678	1591.78
679	1765.46
680	1798.78
681	1575.18
682	1632.62
683	1743.88
684	1571.76
685	1580.81
686	1616.76
687	1590.01
688	1607.73
689	1709.9
690	1603.76
691	1667.53
692	1701.29
693	1272.33
694	1613.21
695	1650.85
696	1898.62
697	1688.76
698	1524.32
699	1439.9
700	1815.73
701	1583.76
702	1286.1
703	1672.68
704	1533.17
705	1820.26
706	1612.05
707	1518
708	1341.05
709	1562.44
710	1388.96
711	1377.09
712	1812.93
713	1598.87
714	1477.59
715	1649.6
716	1575.08
717	1750.22
718	1309.81
719	1712.12
720	1716.52
721	1622.56
722	1576.91
723	1503.46
724	1552.56
725	1681.95
726	1571
727	1463.22
728	1536.76
729	1678.86
730	1690.01
731	1408.28
732	1559.39
733	1633.33
734	1648.95
735	1546.35
736	1812.86
737	1521.71
738	1558.01
739	1627.98
740	1691.29
741	1531.8
742	1636.67
743	1470.04
744	1610.97
745	1754.74
746	1706.15
747	1614.49
748	1931.09
749	1554.73
750	1491.06
751	1626.84
752	1523.47
753	1556.2
754	1721.86
755	1326.61
756	1751.56
757	1157.82
758	1507.47
759	1848.76
760	1588.21
761	1485.15
762	1723.87
763	1648.57
764	1622.93
765	1636.39
766	1651.39
767	1793.87
768	1664.63
769	2136.04
770	1708.73
771	1804.15
772	1442.39
773	1629.32
774	1550.75
775	1615.07
776	1520.82
777	1482.49
778	1795.99
779	1782.16
780	1617.59
781	1632.35
782	1724.85
783	1695
784	1530.79
785	1260.25
786	1567.26
787	1413.68
788	1517.44
789	2164.4
790	1464.06
791	1403.27
792	1605.61
793	1332.75
794	1468.38
795	1663.63
796	1650.36
797	1728.17
798	1343.51
799	1816.01
800	1694.79
801	1908.47
802	1493.26
803	1508.33
804	1415
805	1611.36
806	1296.44
807	1681.78
808	1547.49
809	1565.52
810	1607.38
811	1702.49
812	1356.87
813	1644.99
814	1629.31
815	1510.62
816	1559.79
817	1415.79
818	1627.62
819	1455.89
820	1578.04
821	1436.96
822	1591.06
823	1385.71
824	1548.9
825	1766.65
826	1675.15
827	1660.57
828	1557.06
829	1773.2
830	1742.83
831	1772.67
832	1578.66
833	1714.91
834	1802.68
835	1567.3
836	1497.28
837	1759.27
838	1674.06
839	1636.88
840	1431.48
841	1558.41
842	1743.33
843	1539.74
844	1644.84
845	1617.46
846	1718.92
847	1427.13
848	1746.85
849	1655.81
850	1612.84
851	1626.73
852	1458.57
853	1585.97
854	1516.92
855	1670.3
856	1535.97
857	1786.6
858	1639.61
859	1619.59
860	1484.68
861	1789.28
862	1767.26
863	1595.61
864	1654.79
865	1921.08
866	1589.01
867	1536.46
868	1544.45
869	1844.14
870	1630.16
871	1638.83
872	1662.47
873	1658.37
874	1329.76
875	1386.34
876	1557.15
877	1646.74
878	1549.41
879	1486.42
880	1371.17
881	1633.72
882	1951.91
883	1608.74
884	1405.97
885	1586.21
886	1575.02
887	1650.26
888	1778.08
889	1621.45
890	1670.51
891	1574.14
892	1528.44
893	1487.51
894	1812.07
895	1736.02
896	1497.28
897	1422.09
898	1841.88
899	1406.75
900	1560.56
901	1552.72
902	1693.56
903	1728.07
904	1685.38
905	1454.24
906	1702.49
907	1477.33
908	1583.29
909	1804.98
910	1681.43
911	1443.18
912	1672.18
913	1691.82
914	1464.2
915	1577.84
916	1726.5
917	1763.56
918	1558.39
919	1724.9
920	1809.86
921	1242.6
922	1458.19
923	1569.74
924	1413.22
925	1414.04
926	1445.13
927	1616.56
928	1504.02
929	1508.16
930	1589.75
931	1947.87
932	1780.85
933	1570.77
934	1708.22
935	1759.83
936	1647.38
937	1434.09
938	1943.68
939	1525.66
940	1638.22
941	1662.23
942	1665.65
943	1478.38
944	1637.32
945	1663.61
946	1475.88
947	1594.38
948	1660.58
949	1523.18
950	1467.6
951	1554.11
952	1653.97
953	1417.57
954	1461.32
955	1440.82
956	1774.94
957	1653.92
958	1713.6
959	1775.72
960	1424.39
961	1533.42
962	1730.55
963	1542.67
964	1938.87
965	1496.13
966	1232.01
967	1517.89
968	1982.26
969	1813.23
970	1520.47
971	1926.41
972	1674.23
973	1685.98
974	1625.66
975	1785.83
976	1562.55
977	1475.32
978	1578.59
979	1480.95
980	1622.06
981	1698.91
982	1508.68
983	1305.84
984	2062.9
985	1499.48
986	1493.45
987	1354.53
988	1811.69
989	1253.65
990	1735.98
991	1651.09
992	1794.79
993	1572.95
994	1713.42
995	1643.63
996	1634.53
997	1540.41
998	1592.19
999	1386.12
1000	1681.65
1001	1487.95
1002	1483.5
1003	1514
1004	1652.45
1005	1708.25
1006	1567.76
1007	1629.43
1008	1529.53
1009	1558.2
1010	1637.54
1011	1355.29
1012	1587.29
1013	1606.53
1014	1986.14
1015	1620.22
1016	1607.01
1017	1532.38
1018	1487.09
1019	1523.7
1020	1585.64
1021	1388.7
1022	1362.49
1023	1248.21
1024	1758.53
1025	1543.23
1026	1515.78
1027	1846.73
1028	1727.69
1029	1538.65
1030	1677.46
1031	1622.77
1032	1687.67
1033	1577.93
1034	1493.94
1035	1612.6
1036	1729.11
1037	1843.63
1038	1583.32
1039	1648.54
1040	1529.15
1041	1407.9
1042	1669.57
1043	1469.64
1044	1624.43
1045	1809.84
1046	1592.53
1047	1628.01
1048	1610.14
1049	1596.25
1050	1544.34
1051	1811.63
1052	1507.44
1053	1555.67
1054	1576.12
1055	1637.08
1056	1813.88
1057	1776.44
1058	1403.29
1059	1423.1
1060	1585.15
1061	1459.14
1062	1561.33
1063	1506.16
1064	1676.43
1065	1389.98
1066	1460.78
1067	1508.68
1068	1405.72
1069	1583.19
1070	1637.29
1071	1442.58
1072	1315.19
1073	1591.92
1074	1689.25
1075	1513.32
1076	1701.52
1077	1538.29
1078	1654.98
1079	1701.28
1080	1378.91
1081	1824.48
1082	1620.96
1083	1720.07
1084	1591.8
1085	1628.51
1086	1446.5
1087	1749.7
1088	1595.69
1089	1594.16
1090	1579.93
1091	1347.64
1092	1777.23
1093	1573.11
1094	1826.54
1095	1581.73
1096	1701.08
1097	1768.63
1098	1472.31
1099	1448.53
1100	1487.36
1101	1610.51
1102	1856.02
1103	1557.23
1104	1491.27
1105	1821.53
1106	1433.1
1107	1788.92
1108	1694.86
1109	1738.06
1110	1363.07
1111	1645.21
1112	1513.68
1113	1696.68
1114	1885.33
1115	1611.39
1116	1717.28
1117	1354.49
1118	1480.48
1119	1756.72
1120	1406.15
1121	1652.09
1122	1624.06
1123	1567.27
1124	1428.18
1125	1791.46
1126	1309.28
1127	1860.52
1128	1666.58
1129	1370.18
1130	1639.51
1131	1732.56
1132	1606.15
1133	1615.53
1134	1419.78
1135	1624.07
1136	1585.34
1137	1346.2
1138	1851.72
1139	1810.63
1140	1541.15
1141	1641.14
1142	1473.56
1143	1761.56
1144	1811.41
1145	1695.16
1146	1570.64
1147	1751.02
1148	1570.99
1149	1809.65
1150	1710.36
1151	1666.1
1152	1678.07
1153	1287.63
1154	1681.08
1155	1534.95
1156	1617.57
1157	1511.26
1158	1937.28
1159	1482.2
1160	1554.53
1161	1565.5
1162	1438.28
1163	1679.17
1164	1795.52
1165	1763.28
1166	1725.78
1167	1377.01
1168	1688.52
1169	1504.55
1170	1737.55
1171	1374.79
1172	1818.62
1173	1675.38
1174	1482.57
1175	1622.95
1176	1559.42
1177	1508
1178	1225.8
1179	1534.19
1180	1647.07
1181	1637.62
1182	1666.28
1183	1744.19
1184	1728.56
1185	1731
1186	1678.57
1187	1651.52
1188	1475.52
1189	1627.52
1190	1784.2
1191	1470.81
1192	1672.88
1193	1486.71
1194	1848.07
1195	1474.87
1196	1729.39
1197	1692.2
1198	1797.95
1199	1427.71
1200	1557.54
1201	1476.76
1202	1329.62
1203	1636.6
1204	1714.86
1205	1620.03
1206	1388.21
1207	1427.55
1208	1647.83
1209	1491.86
1210	1686.53
1211	1389.88
1212	1689.57
1213	1525.41
1214	1732.38
1215	1437.46
1216	1350.16
1217	1713.83
1218	1534.94
1219	1580.64
1220	1605.57
1221	1626.65
1222	1593.79
1223	1477.39
1224	1506.43
1225	1393.77
1226	1757.08
1227	1900.5
1228	1590.18
1229	1700.89
1230	1627.7
1231	1329.26
1232	1462.13
1233	1544.73
1234	1614.99
1235	1683.04
1236	1589.37
1237	1402.32
1238	1481.09
1239	1728.61
1240	1659.61
1241	1736.2
1242	1937.28
1243	1681.51
1244	1452.98
1245	1466.67
1246	1467.2
1247	1645.03
1248	1635.9
1249	1533.3
1250	1750.47
1251	1865.59
1252	1736.93
1253	1670.37
1254	1666.91
1255	1685.16
1256	1581.46
1257	1808.18
1258	1624.31
1259	1515.24
1260	1782.48
1261	1706.49
1262	1659.89
1263	1868.51
1264	1512.11
1265	1550.22
1266	1872.26
1267	1680.05
1268	1548.27
1269	1706.84
1270	1587.5
1271	1695.44
1272	1640.51
1273	1706.67
1274	1614.36
1275	1733.52
1276	1633.08
1277	1519.49
1278	1729.61
1279	1520.29
1280	1552.47
1281	1582.51
1282	1631.99
1283	1698.7
1284	1761.34
1285	1614.45
1286	1695.99
1287	1699.73
1288	1495.81
1289	1480.28
1290	1458.47
1291	1564.29
1292	1399.13
1293	1514.64
1294	1368.16
1295	1705.96
1296	1507.06
1297	1475.52
1298	1613.79
1299	1539.68
1300	1426.58
1301	1555.45
1302	1526.41
1303	1638.6
1304	1896.61
1305	1754.48
1306	1733.39
1307	1739.05
1308	1489.06
1309	1679.44
1310	1610.82
1311	1216.64
1312	1647.17
1313	1682.22
1314	1591.15
1315	1794.82
1316	1701.25
1317	1710.66
1318	1353.96
1319	1499.25
1320	1375.88
1321	1161.98
1322	1597.87
1323	1428.16
1324	1375.82
1325	1542.92
1326	1507.61
1327	1728.71
1328	1528.99
1329	1437.77
1330	1823.15
1331	1641.44
1332	1785.52
1333	1581.05
1334	1626.29
1335	1468.14
1336	1323.31
1337	1696.58
1338	1419.39
1339	1723.22
1340	1725.51
1341	1526.85
1342	1586.69
1343	1543.1
1344	1767.5
1345	1611.22
1346	1476.88
1347	1524.31
1348	1387.5
1349	1567.04
1350	1539.59
1351	1502.26
1352	1601.08
1353	1487.83
1354	1639.12
1355	1665.36
1356	1925.7
1357	1675.59
1358	1540.85
1359	1481.84
1360	1494.65
1361	1803.45
1362	1548.09
1363	1621.37
1364	1658.45
1365	1790.21
1366	1563.49
1367	1505.59
1368	1493.95
1369	1494.49
1370	1901.43
1371	1513.22
1372	1496.83
1373	1685.13
1374	1311.78
1375	1654.85
1376	1681.38
1377	1489.78
1378	1881.17
1379	1537.4
1380	1614.31
1381	1444.81
1382	1673.74
1383	1547.08
1384	1593.33
1385	1676.9
1386	1357.34
1387	1627.63
1388	1741.47
1389	1783.07
1390	1579.79
1391	1394.73
1392	1673.55
1393	1624.14
1394	1617.85
1395	1530.84
1396	1413.49
1397	1584.07
1398	1363.35
1399	1559.58
1400	1602.8
1401	1589.97
1402	1461.37
1403	1614.13
1404	1597.7
1405	1561.58
1406	1250.91
1407	1621.08
1408	1881.2
1409	1426.43
1410	1554.88
1411	1418.17
1412	1786.32
1413	1593.93
1414	1522.67
1415	1707.44
1416	1467.52
1417	1556.28
1418	1568.47
1419	1760.82
1420	1569.54
1421	1601.24
1422	1663.57
1423	1874.39
1424	1486.1
1425	1702.82
1426	1362.19
1427	1704.03
1428	1467.88
1429	1625.73
1430	1754.89
1431	1731.64
1432	1610.49
1433	1665.93
1434	1554.04
1435	1880.2
1436	1658.11
1437	1544.21
1438	1648.14
1439	1672.36
1440	1713.49
1441	1630.6
1442	1674.45
1443	1705.36
1444	1501.95
1445	1539.12
1446	1783.69
1447	1604.48
1448	1711.3
1449	1316.24
1450	1784.92
1451	1418.37
1452	1527.39
1453	1812.31
1454	1663.43
1455	1700.79
1456	1584.07
1457	1739.44
1458	1645.43
1459	1719.97
1460	1377.97
1461	1346.95
1462	1667.06
1463	1346.13
1464	1497.51
1465	1416.84
1466	1700.86
1467	1587.14
1468	1678.89
1469	1607.58
1470	1645.45
1471	1541.39
1472	1567.21
1473	1677.42
1474	1718.33
1475	1495.88
1476	1552.9
1477	1773.82
1478	1631.56
1479	1736.14
1480	1697.25
1481	1278.39
1482	1414.29
1483	1648.74
1484	1711.32
1485	1551.74
1486	1478.13
1487	1655.22
1488	1754.1
1489	1621.76
1490	1269.88
1491	1628.48
1492	1538.09
1493	1910.1
1494	1500.35
1495	1544.24
1496	1524.8
1497	1574.35
1498	1744.57
1499	1551.52
1500	1676

## Sheet: Beihai park
0	1017.83
1	1119.33
2	957.129
3	1064.27
4	1009.81
5	980.605
6	954.01
7	1006.89
8	1028.85
9	1012.61
10	1025.56
11	1024.83
12	993.069
13	1062.66
14	974.151
15	893.863
16	922.671
17	1090.62
18	978.515
19	952.004
20	958.072
21	962.684
22	975.855
23	975.425
24	989.309
25	1074.55
26	1003.68
27	1063.95
28	1038.5
29	1016.79
30	970.684
31	977.016
32	988.247
33	937.011
34	1107.31
35	1049.42
36	966.11
37	951.131
38	992.422
39	1037.72
40	986.517
41	935.624
42	954.363
43	998.597
44	1058.13
45	997.526
46	1046.11
47	973.876
48	998.677
49	1006.96
50	918.043
51	886.446
52	1019.98
53	992.337
54	1058.34
55	996.781
56	980.163
57	973.253
58	1032.59
59	1025.08
60	1043
61	1097.88
62	1030.49
63	914.425
64	1006.69
65	1075.01
66	950.167
67	998.787
68	925.082
69	1018.77
70	975.904
71	922.163
72	1028
73	1106.48
74	1032.21
75	991.244
76	1154.59
77	966.546
78	1055.64
79	1038.29
80	1037.86
81	1003.92
82	932.215
83	1033.8
84	1011.5
85	929.671
86	1140.76
87	1079.23
88	1002.86
89	943.72
90	969.938
91	985.641
92	1000.52
93	958.153
94	956.612
95	975.619
96	956.155
97	1059.28
98	955.61
99	1032.45
100	1108.88
101	953.767
102	1026.25
103	970.291
104	989.038
105	932.431
106	1088.95
107	1005.85
108	994.64
109	1001.53
110	993.606
111	948.396
112	995.213
113	1053.86
114	1107.8
115	1004.61
116	880.19
117	1072.51
118	994.794
119	1068.89
120	1049.1
121	994.377
122	959.843
123	1070.24
124	960.481
125	969.425
126	1050.84
127	1020.37
128	921.799
129	991.925
130	993.955
131	994.093
132	1019.13
133	930.976
134	979.428
135	931.093
136	1038.82
137	1060.43
138	990.827
139	1019.21
140	1035.15
141	1024.6
142	1029.87
143	990.146
144	1021.35
145	936.67
146	1025.16
147	1061.58
148	991.175
149	1000.51
150	1097.43
151	990.076
152	1009.01
153	1037.78
154	956.428
155	1014.11
156	1057.49
157	1021.29
158	1010.44
159	919.227
160	943.769
161	897.665
162	950.101
163	1016.24
164	996.646
165	951.435
166	1120.88
167	970.528
168	1003.51
169	1000.15
170	1008.82
171	1043.59
172	886.418
173	923.06
174	915.395
175	1019.34
176	999.272
177	999.076
178	1003.18
179	1056.19
180	981.147
181	918.209
182	947.241
183	942.512
184	932.742
185	1003.75
186	921.607
187	986.233
188	1067.71
189	937.385
190	980.694
191	950.031
192	942.6
193	1070.81
194	966.354
195	938.075
196	941.578
197	961.211
198	1009.14
199	956.186
200	1055.36
201	986.517
202	1014.4
203	937.867
204	973.711
205	1015.36
206	957.453
207	959.753
208	994.047
209	996.745
210	933.81
211	1009.06
212	1064.55
213	1083.94
214	916.644
215	1077.64
216	1081.75
217	1020.18
218	957.171
219	1031.88
220	1007.51
221	939.881
222	980.354
223	979.399
224	1035.25
225	1005.52
226	953.656
227	1057.84
228	1059.04
229	1004.68
230	1028.58
231	1017.23
232	1004.85
233	913.223
234	1058.43
235	948.811
236	985.824
237	1035.01
238	1061.25
239	927.252
240	979.468
241	927.778
242	1062.63
243	988.781
244	966.586
245	891.513
246	934.261
247	972.166
248	1077.4
249	993.382
250	983.287
251	1010.48
252	992.125
253	1006.56
254	1033.15
255	1002.95
256	1032.73
257	992.539
258	970.513
259	1053.84
260	1016.37
261	958.647
262	956.245
263	1095.01
264	1016.89
265	877.355
266	985.018
267	1052.06
268	1018.57
269	967.796
270	1011.26
271	891.265
272	1035.69
273	1049.38
274	966.843
275	1012.35
276	1083.71
277	976.818
278	1036.28
279	1003.85
280	1010.11
281	1132.34
282	1072.82
283	958.455
284	947.922
285	930.757
286	1023.69
287	1082.37
288	967.666
289	979.574
290	1042.85
291	1034.65
292	1046.56
293	1031.16
294	995.639
295	982.386
296	971.162
297	1000.83
298	959.964
299	1002.66
300	971.185
301	949.191
302	1018.06
303	1042.15
304	1116.71
305	1058.18
306	936.052
307	1034.73
308	903.337
309	989.284
310	994.861
311	1010.76
312	1031.37
313	1030.87
314	985.741
315	1035.43
316	995.763
317	972.041
318	991.191
319	906.203
320	1040.87
321	1002.8
322	1063.84
323	995.208
324	875.425
325	1046.1
326	999.246
327	1071.09
328	1021.53
329	942.323
330	948.505
331	1021.51
332	1044.54
333	994.47
334	993.87
335	990.914
336	957.629
337	1055.23
338	975.453
339	958.888
340	942.555
341	1053.28
342	973.992
343	964.047
344	979.145
345	957.007
346	983.697
347	974.199
348	968.494
349	986.367
350	1040.88
351	906.672
352	1003.15
353	931.611
354	819.741
355	987.159
356	1036.75
357	1047.01
358	1041.84
359	1016.38
360	935.789
361	1051.83
362	942.847
363	985.071
364	998.911
365	945.313
366	976.722
367	942.479
368	1105.27
369	946.686
370	992.617
371	973.456
372	977.862
373	981.875
374	1008.75
375	1042.54
376	896.203
377	1007.85
378	1011.07
379	966.975
380	892.904
381	1097.29
382	968.603
383	1038.8
384	992.851
385	1037.85
386	981.673
387	993.56
388	1015.52
389	1018.3
390	1031.88
391	959.649
392	1025.61
393	986.478
394	914.872
395	995.728
396	1042.98
397	1032.48
398	1020.5
399	1026.96
400	1005.56
401	1063.39
402	1065.43
403	970.88
404	963.658
405	976.858
406	976.729
407	925.993
408	990.916
409	1014.25
410	1006.48
411	1078.77
412	1001.3
413	1001.25
414	1012.82
415	961.701
416	1026.95
417	1071.94
418	1047.61
419	1064.71
420	1001.7
421	937.682
422	909.186
423	1022.41
424	1030.54
425	977.612
426	1009.03
427	949.608
428	971.781
429	1066.62
430	1037.16
431	948.484
432	1012.82
433	891.556
434	1014.7
435	1020
436	947.621
437	915.234
438	1057.21
439	1075.67
440	992.45
441	972.402
442	934.018
443	1023.96
444	981.469
445	928.642
446	976.654
447	1034.73
448	987.085
449	1010.89
450	958.188
451	977.345
452	1044.57
453	995.086
454	1031.51
455	1033.48
456	1003.73
457	1041.69
458	1020.99
459	950.155
460	1055.36
461	969.551
462	899.769
463	1033.25
464	961.533
465	1078.19
466	926.835
467	902.929
468	961.115
469	967.093
470	1001.41
471	1040.68
472	1046.79
473	952.775
474	991.289
475	962.191
476	1047.46
477	1058.19
478	1023.15
479	922.77
480	989.7
481	1047.5
482	1004.4
483	995.661
484	1006.11
485	1064.13
486	1011.64
487	925.95
488	910.422
489	986.594
490	1048.79
491	1025.54
492	1003.43
493	951.332
494	1030.68
495	968.803
496	951.772
497	995.202
498	965.516
499	986.144
500	1062.46
501	958.147
502	925.831
503	960.436
504	1006.43
505	1096.42
506	1033.46
507	997.009
508	1023.3
509	1040.7
510	1023.63
511	955.37
512	1084.6
513	943.24
514	995.304
515	929.886
516	1017.3
517	989.566
518	985.702
519	1052.84
520	950.82
521	1092.88
522	1045.63
523	1005.48
524	968.22
525	1043.93
526	1015.87
527	989.98
528	1073.62
529	1052.53
530	975.943
531	1068.03
532	979.755
533	915.799
534	979.553
535	1016.66
536	997.171
537	958.585
538	918.225
539	1026.98
540	985.362
541	985.438
542	919.984
543	1051.22
544	989.53
545	1065.51
546	952.553
547	1045.93
548	956.332
549	902.054
550	988.806
551	988.986
552	1025.08
553	1009.29
554	1058.77
555	1004.19
556	993.744
557	907.696
558	970.172
559	1000.91
560	1011.59
561	922.467
562	1052.72
563	1041.87
564	942.198
565	900.108
566	1020.24
567	996.762
568	994.902
569	930.099
570	1107.48
571	961.223
572	1003.22
573	954.176
574	882.833
575	965.857
576	1021.08
577	954.011
578	968.996
579	985.032
580	1042.18
581	1014.82
582	1033.65
583	1031.66
584	971.146
585	1075.86
586	1033.33
587	918.074
588	1041.11
589	935.385
590	1055.98
591	1008.39
592	1010.26
593	1028.29
594	1051.44
595	979.566
596	958.839
597	1067.11
598	1036.16
599	907.445
600	1000.14
601	992.706
602	951.437
603	968.322
604	1035.08
605	1107.78
606	1053.58
607	969.396
608	987.987
609	983.505
610	1001.19
611	991.058
612	967.884
613	987.76
614	970.218
615	1064.08
616	1030.57
617	1038.99
618	993.096
619	985.095
620	1034.87
621	931.368
622	1090.01
623	1064.75
624	1089.9
625	1006.86
626	1038.67
627	923.021
628	940.272
629	994.764
630	944.862
631	971.782
632	1009.57
633	1001.01
634	980.84
635	901.335
636	971.497
637	938.5
638	1001.16
639	959.272
640	1049.55
641	993.437
642	1028.76
643	1005.31
644	1024.19
645	928.862
646	1028.34
647	980.031
648	933.977
649	1011.55
650	934.923
651	1058.42
652	940.83
653	1032.54
654	1063.16
655	1026.02
656	906.369
657	957.482
658	1061.21
659	1026.88
660	1070.58
661	1030.82
662	1049.17
663	1031.14
664	980.661
665	1025.35
666	1013.68
667	1080.07
668	1042.75
669	946.319
670	1062.23
671	1008.11
672	1017.18
673	1006.67
674	1040.78
675	1028.02
676	960.205
677	941.025
678	997.127
679	1057.81
680	1069.45
681	991.327
682	1011.4
683	1050.27
684	990.135
685	993.295
686	1005.86
687	996.511
688	1002.7
689	1038.4
690	1001.31
691	1023.59
692	1035.39
693	885.516
694	1004.62
695	1017.77
696	1104.33
697	1031.01
698	973.559
699	944.062
700	1075.37
701	994.325
702	890.329
703	1025.39
704	976.65
705	1076.96
706	1004.21
707	971.349
708	909.526
709	986.878
710	926.265
711	922.117
712	1074.39
713	999.605
714	957.233
715	1017.33
716	991.295
717	1052.48
718	898.611
719	1039.17
720	1040.71
721	1007.88
722	991.933
723	966.272
724	983.427
725	1028.63
726	989.867
727	952.212
728	977.905
729	1027.55
730	1031.45
731	933.016
732	985.812
733	1011.65
734	1017.1
735	981.254
736	1074.37
737	972.647
738	985.329
739	1009.78
740	1031.9
741	976.171
742	1012.81
743	954.594
744	1003.83
745	1054.06
746	1037.09
747	1005.06
748	1115.68
749	984.183
750	961.939
751	1009.38
752	973.263
753	984.695
754	1042.57
755	904.482
756	1052.95
757	845.509
758	967.672
759	1086.91
760	995.882
761	959.873
762	1043.28
763	1016.97
764	1008.01
765	1012.71
766	1017.96
767	1067.74
768	1022.58
769	1187.28
770	1037.99
771	1071.33
772	944.935
773	1010.24
774	982.793
775	1005.27
776	972.335
777	958.945
778	1068.48
779	1063.64
780	1006.14
781	1011.3
782	1043.62
783	1033.19
784	975.819
785	881.295
786	988.56
787	934.904
788	971.155
789	1197.19
790	952.505
791	931.264
792	1001.96
793	906.626
794	954.014
795	1022.23
796	1017.6
797	1044.78
798	910.387
799	1075.47
800	1033.12
801	1107.78
802	962.708
803	967.973
804	935.363
805	1003.97
806	893.941
807	1028.57
808	981.654
809	987.954
810	1002.58
811	1035.81
812	915.054
813	1015.72
814	1010.24
815	968.771
816	985.952
817	935.64
818	1009.65
819	949.652
820	992.329
821	943.035
822	996.876
823	925.131
824	982.146
825	1058.22
826	1026.25
827	1021.16
828	984.999
829	1060.52
830	1049.9
831	1060.33
832	992.542
833	1040.15
834	1070.81
835	988.576
836	964.111
837	1055.65
838	1025.88
839	1012.88
840	941.121
841	985.469
842	1050.08
843	978.946
844	1015.66
845	1006.1
846	1041.55
847	939.602
848	1051.31
849	1019.5
850	1004.48
851	1009.34
852	950.585
853	995.1
854	970.973
855	1024.56
856	977.629
857	1065.2
858	1013.84
859	1006.84
860	959.709
861	1066.13
862	1058.44
863	998.466
864	1019.14
865	1112.18
866	996.161
867	977.799
868	980.593
869	1085.3
870	1010.54
871	1013.57
872	1021.83
873	1020.39
874	905.584
875	925.349
876	985.03
877	1016.33
878	982.326
879	960.317
880	920.049
881	1011.78
882	1122.95
883	1003.05
884	932.209
885	995.181
886	991.274
887	1017.56
888	1062.22
889	1007.5
890	1024.64
891	990.966
892	974.998
893	960.698
894	1074.09
895	1047.52
896	964.11
897	937.841
898	1084.51
899	932.48
900	986.221
901	983.482
902	1032.69
903	1044.75
904	1029.83
905	949.073
906	1035.81
907	957.142
908	994.162
909	1071.62
910	1028.45
911	945.21
912	1025.22
913	1032.08
914	952.553
915	992.256
916	1044.2
917	1057.15
918	985.461
919	1043.64
920	1073.32
921	875.129
922	950.454
923	989.428
924	934.742
925	935.03
926	945.89
927	1005.79
928	966.467
929	967.912
930	996.419
931	1121.54
932	1063.18
933	989.786
934	1037.81
935	1055.84
936	1016.55
937	942.032
938	1120.08
939	974.025
940	1013.35
941	1021.74
942	1022.94
943	957.509
944	1013.04
945	1022.22
946	956.636
947	998.036
948	1021.17
949	973.16
950	953.743
951	983.968
952	1018.86
953	936.262
954	951.547
955	944.383
956	1061.12
957	1018.84
958	1039.69
959	1061.39
960	938.644
961	976.736
962	1045.61
963	979.971
964	1118.4
965	963.709
966	871.43
967	971.311
968	1133.55
969	1074.5
970	972.214
971	1114.04
972	1025.94
973	1030.04
974	1008.96
975	1064.93
976	986.917
977	956.437
978	992.521
979	958.406
980	1007.71
981	1034.56
982	968.093
983	897.225
984	1161.73
985	964.88
986	962.773
987	914.235
988	1073.96
989	878.989
990	1047.51
991	1017.85
992	1068.06
993	990.548
994	1039.63
995	1015.24
996	1012.06
997	979.179
998	997.272
999	925.273
1000	1028.53
1001	960.85
1002	959.297
1003	969.953
1004	1018.32
1005	1037.82
1006	988.737
1007	1010.28
1008	975.379
1009	985.395
1010	1013.11
1011	914.5
1012	995.56
1013	1002.28
1014	1134.91
1015	1007.07
1016	1002.45
1017	976.376
1018	960.549
1019	973.343
1020	994.982
1021	926.176
1022	917.017
1023	877.091
1024	1055.39
1025	980.164
1026	970.574
1027	1086.2
1028	1044.61
1029	978.565
1030	1027.06
1031	1007.96
1032	1030.63
1033	992.288
1034	962.943
1035	1004.4
1036	1045.11
1037	1085.12
1038	994.171
1039	1016.96
1040	975.245
1041	932.884
1042	1024.31
1043	954.454
1044	1008.53
1045	1073.32
1046	997.389
1047	1009.79
1048	1003.54
1049	998.69
1050	980.554
1051	1073.94
1052	967.662
1053	984.511
1054	991.658
1055	1012.96
1056	1074.73
1057	1061.65
1058	931.273
1059	938.192
1060	994.81
1061	950.785
1062	986.49
1063	967.215
1064	1026.7
1065	926.622
1066	951.36
1067	968.095
1068	932.121
1069	994.128
1070	1013.03
1071	945
1072	900.491
1073	997.176
1074	1031.18
1075	969.715
1076	1035.47
1077	978.441
1078	1019.21
1079	1035.39
1080	922.754
1081	1078.43
1082	1007.32
1083	1041.95
1084	997.136
1085	1009.96
1086	946.369
1087	1052.3
1088	998.494
1089	997.959
1090	992.989
1091	911.828
1092	1061.92
1093	990.606
1094	1079.15
1095	993.618
1096	1035.31
1097	1058.92
1098	955.388
1099	947.077
1100	960.646
1101	1003.67
1102	1089.45
1103	985.056
1104	962.012
1105	1077.4
1106	941.688
1107	1066.01
1108	1033.14
1109	1048.24
1110	917.219
1111	1015.79
1112	969.84
1113	1033.78
1114	1099.69
1115	1003.98
1116	1040.98
1117	914.222
1118	958.24
1119	1054.76
1120	932.271
1121	1018.2
1122	1008.41
1123	988.566
1124	939.969
1125	1066.89
1126	898.427
1127	1091.02
1128	1023.26
1129	919.705
1130	1013.8
1131	1046.32
1132	1002.15
1133	1005.43
1134	937.035
1135	1008.41
1136	994.877
1137	911.327
1138	1087.95
1139	1073.59
1140	979.44
1141	1014.37
1142	955.825
1143	1056.45
1144	1073.86
1145	1033.25
1146	989.744
1147	1052.76
1148	989.865
1149	1073.25
1150	1038.56
1151	1023.09
1152	1027.28
1153	890.861
1154	1028.33
1155	977.271
1156	1006.14
1157	968.994
1158	1117.84
1159	958.841
1160	984.112
1161	987.945
1162	943.498
1163	1027.66
1164	1068.31
1165	1057.05
1166	1043.94
1167	922.091
1168	1030.93
1169	966.65
1170	1048.06
1171	921.315
1172	1076.38
1173	1026.34
1174	958.972
1175	1008.02
1176	985.821
1177	967.858
1178	869.258
1179	977.006
1180	1016.45
1181	1013.14
1182	1023.16
1183	1050.38
1184	1044.92
1185	1045.77
1186	1027.45
1187	1018
1188	956.51
1189	1009.61
1190	1064.36
1191	954.863
1192	1025.46
1193	960.416
1194	1086.67
1195	956.281
1196	1045.21
1197	1032.21
1198	1069.16
1199	939.803
1200	985.165
1201	956.942
1202	905.534
1203	1012.79
1204	1040.13
1205	1007
1206	926.002
1207	939.748
1208	1016.71
1209	962.219
1210	1030.23
1211	926.587
1212	1031.29
1213	973.938
1214	1046.25
1215	943.212
1216	912.711
1217	1039.77
1218	977.27
1219	993.234
1220	1001.94
1221	1009.31
1222	997.831
1223	957.162
1224	967.307
1225	927.944
1226	1054.88
1227	1104.99
1228	996.568
1229	1035.25
1230	1009.68
1231	905.408
1232	951.83
1233	980.69
1234	1005.24
1235	1029.01
1236	996.286
1237	930.935
1238	958.455
1239	1044.93
1240	1020.83
1241	1047.59
1242	1117.84
1243	1028.48
1244	948.633
1245	953.417
1246	953.601
1247	1015.73
1248	1012.54
1249	976.698
1250	1052.57
1251	1092.79
1252	1047.84
1253	1024.59
1254	1023.38
1255	1029.75
1256	993.521
1257	1072.73
1258	1008.5
1259	970.385
1260	1063.76
1261	1037.21
1262	1020.93
1263	1093.81
1264	969.293
1265	982.606
1266	1095.12
1267	1027.97
1268	981.925
1269	1037.33
1270	995.634
1271	1033.34
1272	1014.15
1273	1037.27
1274	1005.02
1275	1046.65
1276	1011.56
1277	971.872
1278	1045.28
1279	972.151
1280	983.394
1281	993.891
1282	1011.18
1283	1034.48
1284	1056.37
1285	1005.05
1286	1033.54
1287	1034.85
1288	963.599
1289	958.172
1290	950.552
1291	987.525
1292	929.819
1293	970.176
1294	918.997
1295	1037.02
1296	967.53
1297	956.51
1298	1004.82
1299	978.927
1300	939.408
1301	984.433
1302	974.288
1303	1013.49
1304	1103.63
1305	1053.97
1306	1046.6
1307	1048.58
1308	961.239
1309	1027.76
1310	1003.78
1311	866.061
1312	1016.48
1313	1028.73
1314	996.908
1315	1068.07
1316	1035.37
1317	1038.66
1318	914.036
1319	964.801
1320	921.695
1321	846.962
1322	999.257
1323	939.962
1324	921.676
1325	980.058
1326	967.722
1327	1044.97
1328	975.19
1329	943.319
1330	1077.97
1331	1014.48
1332	1064.82
1333	993.38
1334	1009.18
1335	953.932
1336	903.327
1337	1033.75
1338	936.899
1339	1043.05
1340	1043.85
1341	974.444
1342	995.35
1343	980.118
1344	1058.52
1345	1003.92
1346	956.983
1347	973.554
1348	925.756
1349	988.483
1350	978.895
1351	965.852
1352	1000.38
1353	960.808
1354	1013.67
1355	1022.83
1356	1113.79
1357	1026.41
1358	979.334
1359	958.716
1360	963.191
1361	1071.08
1362	981.865
1363	1007.47
1364	1020.42
1365	1066.45
1366	987.244
1367	967.015
1368	962.946
1369	963.136
1370	1105.31
1371	969.682
1372	963.955
1373	1029.74
1374	899.3
1375	1019.16
1376	1028.43
1377	961.491
1378	1098.24
1379	978.129
1380	1005
1381	945.78
1382	1025.76
1383	981.512
1384	997.671
1385	1026.87
1386	915.217
1387	1009.65
1388	1049.43
1389	1063.96
1390	992.939
1391	928.281
1392	1025.7
1393	1008.43
1394	1006.24
1395	975.838
1396	934.835
1397	994.435
1398	917.319
1399	985.879
1400	1000.98
1401	996.497
1402	951.564
1403	1004.94
1404	999.195
1405	986.576
1406	878.031
1407	1007.36
1408	1098.25
1409	939.358
1410	984.237
1411	936.471
1412	1065.1
1413	997.878
1414	972.983
1415	1037.54
1416	953.712
1417	984.724
1418	988.982
1419	1056.19
1420	989.358
1421	1000.43
1422	1022.21
1423	1095.87
1424	960.205
1425	1035.92
1426	916.914
1427	1036.35
1428	953.839
1429	1008.99
1430	1054.12
1431	1045.99
1432	1003.67
1433	1023.04
1434	983.942
1435	1097.9
1436	1020.3
1437	980.508
1438	1016.82
1439	1025.28
1440	1039.65
1441	1010.69
1442	1026.01
1443	1036.81
1444	965.744
1445	978.73
1446	1064.18
1447	1001.57
1448	1038.89
1449	900.86
1450	1064.61
1451	936.541
1452	974.631
1453	1074.18
1454	1022.16
1455	1035.22
1456	994.433
1457	1048.72
1458	1015.87
1459	1041.92
1460	922.428
1461	911.589
1462	1023.43
1463	911.301
1464	964.191
1465	936.008
1466	1035.24
1467	995.505
1468	1027.56
1469	1002.65
1470	1015.88
1471	979.522
1472	988.542
1473	1027.05
1474	1041.34
1475	963.623
1476	983.543
1477	1060.73
1478	1011.03
1479	1047.57
1480	1033.98
1481	887.633
1482	935.116
1483	1017.03
1484	1038.89
1485	983.138
1486	957.422
1487	1019.29
1488	1053.84
1489	1007.6
1490	884.661
1491	1009.95
1492	978.368
1493	1108.34
1494	965.184
1495	980.518
1496	973.728
1497	991.04
1498	1050.51
1499	983.061
1500	1026.55

## Sheet: National zoo
0	1651.02
1	1941.55
2	1477.29
3	1783.94
4	1628.08
5	1544.49
6	1468.37
7	1619.72
8	1682.59
9	1636.08
10	1673.15
11	1671.08
12	1580.16
13	1779.36
14	1526.02
15	1296.22
16	1378.67
17	1859.36
18	1538.51
19	1462.63
20	1479.99
21	1493.2
22	1530.89
23	1529.66
24	1569.4
25	1813.37
26	1610.53
27	1783.04
28	1710.18
29	1648.05
30	1516.09
31	1534.21
32	1566.36
33	1419.71
34	1907.13
35	1741.44
36	1503
37	1460.13
38	1578.31
39	1707.95
40	1561.41
41	1415.74
42	1469.38
43	1595.98
44	1766.38
45	1592.92
46	1731.98
47	1525.23
48	1596.21
49	1619.93
50	1365.42
51	1274.99
52	1657.2
53	1578.07
54	1766.98
55	1590.79
56	1543.22
57	1523.44
58	1693.28
59	1671.78
60	1723.06
61	1880.16
62	1687.27
63	1355.07
64	1619.13
65	1814.69
66	1457.37
67	1596.53
68	1385.57
69	1653.72
70	1531.03
71	1377.22
72	1680.13
73	1904.75
74	1692.19
75	1574.94
76	2042.47
77	1504.25
78	1759.26
79	1709.58
80	1708.37
81	1611.22
82	1405.99
83	1696.75
84	1632.93
85	1398.71
86	2002.89
87	1826.77
88	1608.17
89	1438.92
90	1513.96
91	1558.9
92	1601.48
93	1480.23
94	1475.82
95	1530.22
96	1474.51
97	1769.68
98	1472.95
99	1692.88
100	1911.64
101	1467.67
102	1675.14
103	1514.97
104	1568.63
105	1406.61
106	1854.58
107	1616.75
108	1584.66
109	1604.38
110	1581.7
111	1452.3
112	1586.3
113	1754.16
114	1908.55
115	1613.18
116	1257.08
117	1807.54
118	1585.1
119	1797.16
120	1740.54
121	1583.91
122	1485.06
123	1801.04
124	1486.89
125	1512.49
126	1745.5
127	1658.32
128	1376.18
129	1576.89
130	1582.7
131	1583.09
132	1654.76
133	1402.44
134	1541.12
135	1402.78
136	1711.12
137	1772.97
138	1573.75
139	1654.98
140	1700.59
141	1670.4
142	1685.48
143	1571.8
144	1661.1
145	1418.74
146	1672
147	1776.26
148	1574.74
149	1601.46
150	1878.87
151	1571.6
152	1625.78
153	1708.15
154	1475.29
155	1640.37
156	1764.54
157	1660.94
158	1629.89
159	1368.81
160	1439.06
161	1307.1
162	1457.18
163	1646.49
164	1590.4
165	1461
166	1945.99
167	1515.65
168	1610.04
169	1600.42
170	1625.23
171	1724.76
172	1274.91
173	1379.79
174	1357.85
175	1655.37
176	1597.92
177	1597.35
178	1609.12
179	1760.83
180	1546.04
181	1365.9
182	1449
183	1435.46
184	1407.5
185	1610.73
186	1375.62
187	1560.6
188	1793.81
189	1420.79
190	1544.74
191	1456.98
192	1435.71
193	1802.66
194	1503.7
195	1422.76
196	1432.79
197	1488.98
198	1626.17
199	1474.6
200	1758.45
201	1561.41
202	1641.23
203	1422.16
204	1524.76
205	1643.97
206	1478.22
207	1484.81
208	1582.96
209	1590.68
210	1410.55
211	1625.93
212	1784.75
213	1840.25
214	1361.42
215	1822.23
216	1833.99
217	1657.76
218	1477.41
219	1691.24
220	1621.49
221	1427.93
222	1543.77
223	1541.04
224	1700.89
225	1615.81
226	1467.35
227	1765.54
228	1768.97
229	1613.4
230	1681.8
231	1649.31
232	1613.88
233	1351.63
234	1767.25
235	1453.49
236	1559.42
237	1700.19
238	1775.3
239	1391.78
240	1541.23
241	1393.29
242	1779.25
243	1567.89
244	1504.36
245	1289.49
246	1411.84
247	1520.34
248	1821.53
249	1581.06
250	1552.16
251	1629.98
252	1577.46
253	1618.79
254	1694.87
255	1608.46
256	1693.68
257	1578.64
258	1515.6
259	1754.1
260	1646.84
261	1481.64
262	1474.76
263	1871.93
264	1648.34
265	1248.97
266	1557.12
267	1749.02
268	1653.14
269	1507.83
270	1632.22
271	1288.78
272	1702.14
273	1741.33
274	1505.1
275	1635.35
276	1839.6
277	1533.65
278	1703.85
279	1611.02
280	1628.92
281	1978.77
282	1808.41
283	1481.09
284	1450.94
285	1401.82
286	1667.8
287	1835.77
288	1507.46
289	1541.54
290	1722.65
291	1699.16
292	1733.25
293	1689.19
294	1587.52
295	1549.59
296	1517.46
297	1602.39
298	1485.41
299	1607.63
300	1517.53
301	1454.58
302	1651.69
303	1720.63
304	1934.03
305	1766.53
306	1416.97
307	1699.42
308	1323.33
309	1569.33
310	1585.29
311	1630.78
312	1689.78
313	1688.35
314	1559.19
315	1701.41
316	1587.87
317	1519.98
318	1574.79
319	1331.54
320	1716.96
321	1608.01
322	1782.72
323	1586.28
324	1243.45
325	1731.94
326	1597.84
327	1803.48
328	1661.64
329	1434.92
330	1452.61
331	1661.57
332	1727.48
333	1584.17
334	1582.45
335	1573.99
336	1478.73
337	1758.08
338	1529.74
339	1482.33
340	1435.58
341	1752.48
342	1525.56
343	1497.1
344	1540.31
345	1476.95
346	1553.34
347	1526.15
348	1509.82
349	1560.98
350	1717.01
351	1332.88
352	1609.01
353	1404.26
354	1084.07
355	1563.25
356	1705.19
357	1734.55
358	1719.76
359	1646.88
360	1416.22
361	1748.34
362	1436.42
363	1557.27
364	1596.88
365	1443.48
366	1533.37
367	1435.37
368	1901.31
369	1447.41
370	1578.87
371	1524.03
372	1536.64
373	1548.12
374	1625.05
375	1721.75
376	1302.92
377	1622.48
378	1631.7
379	1505.48
380	1293.47
381	1878.46
382	1510.14
383	1711.05
384	1579.54
385	1708.32
386	1547.55
387	1581.57
388	1644.42
389	1652.38
390	1691.25
391	1484.51
392	1673.31
393	1561.3
394	1356.35
395	1587.77
396	1723.01
397	1692.97
398	1658.68
399	1677.16
400	1615.92
401	1781.44
402	1787.28
403	1516.65
404	1495.98
405	1533.76
406	1533.39
407	1388.18
408	1574
409	1640.8
410	1618.56
411	1825.46
412	1603.73
413	1603.58
414	1636.7
415	1490.38
416	1677.13
417	1805.89
418	1736.26
419	1785.22
420	1604.87
421	1421.64
422	1340.08
423	1664.13
424	1687.41
425	1535.92
426	1625.85
427	1455.77
428	1519.23
429	1790.69
430	1706.37
431	1452.55
432	1636.68
433	1289.62
434	1642.08
435	1657.25
436	1450.08
437	1357.39
438	1763.75
439	1816.58
440	1578.39
441	1521.01
442	1411.15
443	1668.58
444	1546.96
445	1395.76
446	1533.18
447	1699.4
448	1563.03
449	1631.16
450	1480.33
451	1535.16
452	1727.57
453	1585.94
454	1690.18
455	1695.83
456	1610.68
457	1719.31
458	1660.08
459	1457.33
460	1758.44
461	1512.85
462	1313.12
463	1695.16
464	1489.9
465	1823.78
466	1390.59
467	1322.17
468	1488.7
469	1505.81
470	1604.03
471	1716.44
472	1733.91
473	1464.84
474	1575.07
475	1491.78
476	1735.85
477	1766.55
478	1666.26
479	1378.96
480	1570.52
481	1735.96
482	1612.59
483	1587.58
484	1617.48
485	1783.54
486	1633.32
487	1388.06
488	1343.61
489	1561.63
490	1739.66
491	1673.11
492	1609.82
493	1460.7
494	1687.82
495	1510.71
496	1461.96
497	1586.27
498	1501.3
499	1560.34
500	1778.77
501	1480.21
502	1387.72
503	1486.76
504	1618.42
505	1875.97
506	1695.76
507	1591.44
508	1666.7
509	1716.48
510	1667.63
511	1472.26
512	1842.13
513	1437.54
514	1586.56
515	1399.32
516	1649.51
517	1570.14
518	1559.08
519	1751.23
520	1459.24
521	1865.84
522	1730.6
523	1615.68
524	1509.04
525	1725.73
526	1645.43
527	1571.32
528	1810.71
529	1750.36
530	1531.14
531	1794.71
532	1542.06
533	1359
534	1541.48
535	1647.68
536	1591.9
537	1481.46
538	1365.95
539	1677.21
540	1558.1
541	1558.32
542	1370.98
543	1746.6
544	1570.03
545	1787.5
546	1464.2
547	1731.47
548	1475.02
549	1319.66
550	1567.96
551	1568.48
552	1671.79
553	1626.6
554	1768.22
555	1611.98
556	1582.1
557	1335.81
558	1514.63
559	1602.6
560	1633.16
561	1378.09
562	1750.9
563	1719.84
564	1434.56
565	1314.09
566	1657.94
567	1590.73
568	1585.41
569	1399.93
570	1907.63
571	1489.01
572	1609.21
573	1468.84
574	1264.65
575	1502.28
576	1660.34
577	1468.37
578	1511.26
579	1557.16
580	1720.73
581	1642.42
582	1696.32
583	1690.62
584	1517.41
585	1817.13
586	1695.4
587	1365.51
588	1717.67
589	1415.06
590	1760.24
591	1624.02
592	1629.36
593	1680.98
594	1747.23
595	1541.51
596	1482.19
597	1792.09
598	1703.49
599	1335.09
600	1600.39
601	1579.12
602	1461
603	1509.33
604	1700.41
605	1908.49
606	1753.36
607	1512.41
608	1565.62
609	1552.79
610	1603.42
611	1574.41
612	1508.08
613	1564.97
614	1514.76
615	1783.42
616	1687.51
617	1711.6
618	1580.24
619	1557.34
620	1699.81
621	1403.56
622	1857.61
623	1785.33
624	1857.31
625	1619.63
626	1710.69
627	1379.67
628	1429.05
629	1585.01
630	1442.19
631	1519.24
632	1627.39
633	1602.88
634	1545.16
635	1317.6
636	1518.42
637	1423.98
638	1603.33
639	1483.43
640	1741.83
641	1581.22
642	1682.32
643	1615.2
644	1669.22
645	1396.39
646	1681.11
647	1542.85
648	1411.03
649	1633.06
650	1413.74
651	1767.22
652	1430.64
653	1693.15
654	1780.78
655	1674.47
656	1332.01
657	1478.31
658	1775.21
659	1676.93
660	1802.02
661	1688.21
662	1740.73
663	1689.13
664	1544.65
665	1672.56
666	1639.15
667	1829.19
668	1722.36
669	1446.36
670	1778.12
671	1623.22
672	1649.17
673	1619.1
674	1716.72
675	1680.19
676	1486.1
677	1431.2
678	1591.78
679	1765.46
680	1798.78
681	1575.18
682	1632.62
683	1743.88
684	1571.76
685	1580.81
686	1616.76
687	1590.01
688	1607.73
689	1709.9
690	1603.76
691	1667.53
692	1701.29
693	1272.33
694	1613.21
695	1650.85
696	1898.62
697	1688.76
698	1524.32
699	1439.9
700	1815.73
701	1583.76
702	1286.1
703	1672.68
704	1533.17
705	1820.26
706	1612.05
707	1518
708	1341.05
709	1562.44
710	1388.96
711	1377.09
712	1812.93
713	1598.87
714	1477.59
715	1649.6
716	1575.08
717	1750.22
718	1309.81
719	1712.12
720	1716.52
721	1622.56
722	1576.91
723	1503.46
724	1552.56
725	1681.95
726	1571
727	1463.22
728	1536.76
729	1678.86
730	1690.01
731	1408.28
732	1559.39
733	1633.33
734	1648.95
735	1546.35
736	1812.86
737	1521.71
738	1558.01
739	1627.98
740	1691.29
741	1531.8
742	1636.67
743	1470.04
744	1610.97
745	1754.74
746	1706.15
747	1614.49
748	1931.09
749	1554.73
750	1491.06
751	1626.84
752	1523.47
753	1556.2
754	1721.86
755	1326.61
756	1751.56
757	1157.82
758	1507.47
759	1848.76
760	1588.21
761	1485.15
762	1723.87
763	1648.57
764	1622.93
765	1636.39
766	1651.39
767	1793.87
768	1664.63
769	2136.04
770	1708.73
771	1804.15
772	1442.39
773	1629.32
774	1550.75
775	1615.07
776	1520.82
777	1482.49
778	1795.99
779	1782.16
780	1617.59
781	1632.35
782	1724.85
783	1695
784	1530.79
785	1260.25
786	1567.26
787	1413.68
788	1517.44
789	2164.4
790	1464.06
791	1403.27
792	1605.61
793	1332.75
794	1468.38
795	1663.63
796	1650.36
797	1728.17
798	1343.51
799	1816.01
800	1694.79
801	1908.47
802	1493.26
803	1508.33
804	1415
805	1611.36
806	1296.44
807	1681.78
808	1547.49
809	1565.52
810	1607.38
811	1702.49
812	1356.87
813	1644.99
814	1629.31
815	1510.62
816	1559.79
817	1415.79
818	1627.62
819	1455.89
820	1578.04
821	1436.96
822	1591.06
823	1385.71
824	1548.9
825	1766.65
826	1675.15
827	1660.57
828	1557.06
829	1773.2
830	1742.83
831	1772.67
832	1578.66
833	1714.91
834	1802.68
835	1567.3
836	1497.28
837	1759.27
838	1674.06
839	1636.88
840	1431.48
841	1558.41
842	1743.33
843	1539.74
844	1644.84
845	1617.46
846	1718.92
847	1427.13
848	1746.85
849	1655.81
850	1612.84
851	1626.73
852	1458.57
853	1585.97
854	1516.92
855	1670.3
856	1535.97
857	1786.6
858	1639.61
859	1619.59
860	1484.68
861	1789.28
862	1767.26
863	1595.61
864	1654.79
865	1921.08
866	1589.01
867	1536.46
868	1544.45
869	1844.14
870	1630.16
871	1638.83
872	1662.47
873	1658.37
874	1329.76
875	1386.34
876	1557.15
877	1646.74
878	1549.41
879	1486.42
880	1371.17
881	1633.72
882	1951.91
883	1608.74
884	1405.97
885	1586.21
886	1575.02
887	1650.26
888	1778.08
889	1621.45
890	1670.51
891	1574.14
892	1528.44
893	1487.51
894	1812.07
895	1736.02
896	1497.28
897	1422.09
898	1841.88
899	1406.75
900	1560.56
901	1552.72
902	1693.56
903	1728.07
904	1685.38
905	1454.24
906	1702.49
907	1477.33
908	1583.29
909	1804.98
910	1681.43
911	1443.18
912	1672.18
913	1691.82
914	1464.2
915	1577.84
916	1726.5
917	1763.56
918	1558.39
919	1724.9
920	1809.86
921	1242.6
922	1458.19
923	1569.74
924	1413.22
925	1414.04
926	1445.13
927	1616.56
928	1504.02
929	1508.16
930	1589.75
931	1947.87
932	1780.85
933	1570.77
934	1708.22
935	1759.83
936	1647.38
937	1434.09
938	1943.68
939	1525.66
940	1638.22
941	1662.23
942	1665.65
943	1478.38
944	1637.32
945	1663.61
946	1475.88
947	1594.38
948	1660.58
949	1523.18
950	1467.6
951	1554.11
952	1653.97
953	1417.57
954	1461.32
955	1440.82
956	1774.94
957	1653.92
958	1713.6
959	1775.72
960	1424.39
961	1533.42
962	1730.55
963	1542.67
964	1938.87
965	1496.13
966	1232.01
967	1517.89
968	1982.26
969	1813.23
970	1520.47
971	1926.41
972	1674.23
973	1685.98
974	1625.66
975	1785.83
976	1562.55
977	1475.32
978	1578.59
979	1480.95
980	1622.06
981	1698.91
982	1508.68
983	1305.84
984	2062.9
985	1499.48
986	1493.45
987	1354.53
988	1811.69
989	1253.65
990	1735.98
991	1651.09
992	1794.79
993	1572.95
994	1713.42
995	1643.63
996	1634.53
997	1540.41
998	1592.19
999	1386.12
1000	1681.65
1001	1487.95
1002	1483.5
1003	1514
1004	1652.45
1005	1708.25
1006	1567.76
1007	1629.43
1008	1529.53
1009	1558.2
1010	1637.54
1011	1355.29
1012	1587.29
1013	1606.53
1014	1986.14
1015	1620.22
1016	1607.01
1017	1532.38
1018	1487.09
1019	1523.7
1020	1585.64
1021	1388.7
1022	1362.49
1023	1248.21
1024	1758.53
1025	1543.23
1026	1515.78
1027	1846.73
1028	1727.69
1029	1538.65
1030	1677.46
1031	1622.77
1032	1687.67
1033	1577.93
1034	1493.94
1035	1612.6
1036	1729.11
1037	1843.63
1038	1583.32
1039	1648.54
1040	1529.15
1041	1407.9
1042	1669.57
1043	1469.64
1044	1624.43
1045	1809.84
1046	1592.53
1047	1628.01
1048	1610.14
1049	1596.25
1050	1544.34
1051	1811.63
1052	1507.44
1053	1555.67
1054	1576.12
1055	1637.08
1056	1813.88
1057	1776.44
1058	1403.29
1059	1423.1
1060	1585.15
1061	1459.14
1062	1561.33
1063	1506.16
1064	1676.43
1065	1389.98
1066	1460.78
1067	1508.68
1068	1405.72
1069	1583.19
1070	1637.29
1071	1442.58
1072	1315.19
1073	1591.92
1074	1689.25
1075	1513.32
1076	1701.52
1077	1538.29
1078	1654.98
1079	1701.28
1080	1378.91
1081	1824.48
1082	1620.96
1083	1720.07
1084	1591.8
1085	1628.51
1086	1446.5
1087	1749.7
1088	1595.69
1089	1594.16
1090	1579.93
1091	1347.64
1092	1777.23
1093	1573.11
1094	1826.54
1095	1581.73
1096	1701.08
1097	1768.63
1098	1472.31
1099	1448.53
1100	1487.36
1101	1610.51
1102	1856.02
1103	1557.23
1104	1491.27
1105	1821.53
1106	1433.1
1107	1788.92
1108	1694.86
1109	1738.06
1110	1363.07
1111	1645.21
1112	1513.68
1113	1696.68
1114	1885.33
1115	1611.39
1116	1717.28
1117	1354.49
1118	1480.48
1119	1756.72
1120	1406.15
1121	1652.09
1122	1624.06
1123	1567.27
1124	1428.18
1125	1791.46
1126	1309.28
1127	1860.52
1128	1666.58
1129	1370.18
1130	1639.51
1131	1732.56
1132	1606.15
1133	1615.53
1134	1419.78
1135	1624.07
1136	1585.34
1137	1346.2
1138	1851.72
1139	1810.63
1140	1541.15
1141	1641.14
1142	1473.56
1143	1761.56
1144	1811.41
1145	1695.16
1146	1570.64
1147	1751.02
1148	1570.99
1149	1809.65
1150	1710.36
1151	1666.1
1152	1678.07
1153	1287.63
1154	1681.08
1155	1534.95
1156	1617.57
1157	1511.26
1158	1937.28
1159	1482.2
1160	1554.53
1161	1565.5
1162	1438.28
1163	1679.17
1164	1795.52
1165	1763.28
1166	1725.78
1167	1377.01
1168	1688.52
1169	1504.55
1170	1737.55
1171	1374.79
1172	1818.62
1173	1675.38
1174	1482.57
1175	1622.95
1176	1559.42
1177	1508
1178	1225.8
1179	1534.19
1180	1647.07
1181	1637.62
1182	1666.28
1183	1744.19
1184	1728.56
1185	1731
1186	1678.57
1187	1651.52
1188	1475.52
1189	1627.52
1190	1784.2
1191	1470.81
1192	1672.88
1193	1486.71
1194	1848.07
1195	1474.87
1196	1729.39
1197	1692.2
1198	1797.95
1199	1427.71
1200	1557.54
1201	1476.76
1202	1329.62
1203	1636.6
1204	1714.86
1205	1620.03
1206	1388.21
1207	1427.55
1208	1647.83
1209	1491.86
1210	1686.53
1211	1389.88
1212	1689.57
1213	1525.41
1214	1732.38
1215	1437.46
1216	1350.16
1217	1713.83
1218	1534.94
1219	1580.64
1220	1605.57
1221	1626.65
1222	1593.79
1223	1477.39
1224	1506.43
1225	1393.77
1226	1757.08
1227	1900.5
1228	1590.18
1229	1700.89
1230	1627.7
1231	1329.26
1232	1462.13
1233	1544.73
1234	1614.99
1235	1683.04
1236	1589.37
1237	1402.32
1238	1481.09
1239	1728.61
1240	1659.61
1241	1736.2
1242	1937.28
1243	1681.51
1244	1452.98
1245	1466.67
1246	1467.2
1247	1645.03
1248	1635.9
1249	1533.3
1250	1750.47
1251	1865.59
1252	1736.93
1253	1670.37
1254	1666.91
1255	1685.16
1256	1581.46
1257	1808.18
1258	1624.31
1259	1515.24
1260	1782.48
1261	1706.49
1262	1659.89
1263	1868.51
1264	1512.11
1265	1550.22
1266	1872.26
1267	1680.05
1268	1548.27
1269	1706.84
1270	1587.5
1271	1695.44
1272	1640.51
1273	1706.67
1274	1614.36
1275	1733.52
1276	1633.08
1277	1519.49
1278	1729.61
1279	1520.29
1280	1552.47
1281	1582.51
1282	1631.99
1283	1698.7
1284	1761.34
1285	1614.45
1286	1695.99
1287	1699.73
1288	1495.81
1289	1480.28
1290	1458.47
1291	1564.29
1292	1399.13
1293	1514.64
1294	1368.16
1295	1705.96
1296	1507.06
1297	1475.52
1298	1613.79
1299	1539.68
1300	1426.58
1301	1555.45
1302	1526.41
1303	1638.6
1304	1896.61
1305	1754.48
1306	1733.39
1307	1739.05
1308	1489.06
1309	1679.44
1310	1610.82
1311	1216.64
1312	1647.17
1313	1682.22
1314	1591.15
1315	1794.82
1316	1701.25
1317	1710.66
1318	1353.96
1319	1499.25
1320	1375.88
1321	1161.98
1322	1597.87
1323	1428.16
1324	1375.82
1325	1542.92
1326	1507.61
1327	1728.71
1328	1528.99
1329	1437.77
1330	1823.15
1331	1641.44
1332	1785.52
1333	1581.05
1334	1626.29
1335	1468.14
1336	1323.31
1337	1696.58
1338	1419.39
1339	1723.22
1340	1725.51
1341	1526.85
1342	1586.69
1343	1543.1
1344	1767.5
1345	1611.22
1346	1476.88
1347	1524.31
1348	1387.5
1349	1567.04
1350	1539.59
1351	1502.26
1352	1601.08
1353	1487.83
1354	1639.12
1355	1665.36
1356	1925.7
1357	1675.59
1358	1540.85
1359	1481.84
1360	1494.65
1361	1803.45
1362	1548.09
1363	1621.37
1364	1658.45
1365	1790.21
1366	1563.49
1367	1505.59
1368	1493.95
1369	1494.49
1370	1901.43
1371	1513.22
1372	1496.83
1373	1685.13
1374	1311.78
1375	1654.85
1376	1681.38
1377	1489.78
1378	1881.17
1379	1537.4
1380	1614.31
1381	1444.81
1382	1673.74
1383	1547.08
1384	1593.33
1385	1676.9
1386	1357.34
1387	1627.63
1388	1741.47
1389	1783.07
1390	1579.79
1391	1394.73
1392	1673.55
1393	1624.14
1394	1617.85
1395	1530.84
1396	1413.49
1397	1584.07
1398	1363.35
1399	1559.58
1400	1602.8
1401	1589.97
1402	1461.37
1403	1614.13
1404	1597.7
1405	1561.58
1406	1250.91
1407	1621.08
1408	1881.2
1409	1426.43
1410	1554.88
1411	1418.17
1412	1786.32
1413	1593.93
1414	1522.67
1415	1707.44
1416	1467.52
1417	1556.28
1418	1568.47
1419	1760.82
1420	1569.54
1421	1601.24
1422	1663.57
1423	1874.39
1424	1486.1
1425	1702.82
1426	1362.19
1427	1704.03
1428	1467.88
1429	1625.73
1430	1754.89
1431	1731.64
1432	1610.49
1433	1665.93
1434	1554.04
1435	1880.2
1436	1658.11
1437	1544.21
1438	1648.14
1439	1672.36
1440	1713.49
1441	1630.6
1442	1674.45
1443	1705.36
1444	1501.95
1445	1539.12
1446	1783.69
1447	1604.48
1448	1711.3
1449	1316.24
1450	1784.92
1451	1418.37
1452	1527.39
1453	1812.31
1454	1663.43
1455	1700.79
1456	1584.07
1457	1739.44
1458	1645.43
1459	1719.97
1460	1377.97
1461	1346.95
1462	1667.06
1463	1346.13
1464	1497.51
1465	1416.84
1466	1700.86
1467	1587.14
1468	1678.89
1469	1607.58
1470	1645.45
1471	1541.39
1472	1567.21
1473	1677.42
1474	1718.33
1475	1495.88
1476	1552.9
1477	1773.82
1478	1631.56
1479	1736.14
1480	1697.25
1481	1278.39
1482	1414.29
1483	1648.74
1484	1711.32
1485	1551.74
1486	1478.13
1487	1655.22
1488	1754.1
1489	1621.76
1490	1269.88
1491	1628.48
1492	1538.09
1493	1910.1
1494	1500.35
1495	1544.24
1496	1524.8
1497	1574.35
1498	1744.57
1499	1551.52
1500	1676
