# Supplementary material for: Spatial layout optimization model integrating layered attention mechanism in the development of smart tourism management
Source: PeerJ Comput Sci. 2024 Oct 9;10:e2329. doi: 10.7717/peerj-cs.2329 (PMC11623231; doi:10.7717/peerj-cs.2329)
Supplement: Supplemental Information 2 [file peerj-cs-10-2329-s002.xlsx]

## Sheet: Wa1
0	0.862474
1	1.00955
2	0.914003
3	0.904659
4	0.783912
5	0.747282
6	0.796844
7	0.917441
8	0.96112
9	0.896968
10	0.815901
11	0.774008
12	0.798472
13	0.924784
14	0.925148
15	0.849339
16	0.782837
17	0.817308
18	0.774407
19	0.838
20	0.906399
21	0.901976
22	0.837651
23	0.76787
24	0.770881
25	0.878966
26	0.915025
27	0.960848
28	0.892315
29	0.806997
30	0.758894
31	0.808327
32	0.888134
33	0.897396
34	0.943214
35	0.84246
36	0.76077
37	0.780346
38	0.869531
39	0.939209
40	0.899114
41	0.810444
42	0.765077
43	0.791604
44	0.878301
45	0.909474
46	0.933799
47	0.84834
48	0.798302
49	0.78973
50	0.798867
51	0.848012
52	0.924623
53	0.873939
54	0.838878
55	0.785501
56	0.809862
57	0.868123
58	0.926588
59	0.900811
60	0.849165
61	0.829896
62	0.81793
63	0.828614
64	0.908871
65	0.928561
66	0.831046
67	0.800696
68	0.77158
69	0.851426
70	0.8867
71	0.877197
72	0.875423
73	0.851013
74	0.807969
75	0.826879
76	0.935253
77	0.893757
78	0.897594
79	0.840464
80	0.81142
81	0.819547
82	0.845208
83	0.912056
84	0.892359
85	0.819745
86	0.849532
87	0.83521
88	0.853844
89	0.875935
90	0.885461
91	0.851933
92	0.814018
93	0.79356
94	0.826702
95	0.875942
96	0.883968
97	0.885928
98	0.812203
99	0.815238
100	0.85939
101	0.858315
102	0.902533
103	0.870286
104	0.834187
105	0.790852
106	0.844151
107	0.860623
108	0.888834
109	0.885754
110	0.847687
111	0.802196
112	0.813635
113	0.861059
114	0.910123
115	0.890038
116	0.830599
117	0.842137
118	0.811714
119	0.853681
120	0.885322
121	0.887788
122	0.860422
123	0.850614
124	0.805008
125	0.821423
126	0.874976
127	0.891078
128	0.859333
129	0.842487
130	0.816974
131	0.821432
132	0.857256
133	0.866122
134	0.877073
135	0.839401
136	0.832843
137	0.832475
138	0.841716
139	0.87809
140	0.890436
141	0.86799
142	0.838391
143	0.817413
144	0.83995
145	0.853307
146	0.887137
147	0.882006
148	0.839137
149	0.821707
150	0.848228
151	0.855365
152	0.880553
153	0.881939
154	0.841355
155	0.828509
156	0.836324
157	0.852769
158	0.87555
159	0.863214
160	0.847413
161	0.813974
162	0.815792
163	0.844355
164	0.866649
165	0.86965
166	0.884268
167	0.833798
168	0.825772
169	0.835649
170	0.861528
171	0.883085
172	0.850955
173	0.833724
174	0.814621
175	0.834461
176	0.852818
177	0.872356
178	0.872812
179	0.861377
180	0.829393
181	0.817031
182	0.838505
183	0.859182
184	0.863848
185	0.85963
186	0.826408
187	0.82691
188	0.85015
189	0.853125
190	0.870353
191	0.857251
192	0.835746
193	0.839869
194	0.831814
195	0.847582
196	0.863083
197	0.862584
198	0.850754
199	0.827614
200	0.840638
201	0.848252
202	0.869033
203	0.861851
204	0.851901
205	0.839217
206	0.827266
207	0.839882
208	0.862021
209	0.869534
210	0.852115
211	0.84318
212	0.840377
213	0.850165
214	0.84824
215	0.877546
216	0.87275
217	0.84943
218	0.829987
219	0.840988
220	0.853538
221	0.859831
222	0.863809
223	0.849903
224	0.841391
225	0.836403
226	0.843221
227	0.86888
228	0.872922
229	0.856957
230	0.844287
231	0.837229
232	0.844492
233	0.850423
234	0.872248
235	0.855119
236	0.84422
237	0.839779
238	0.846696
239	0.847898
240	0.863157
241	0.855973
242	0.855512
243	0.837446
244	0.835924
245	0.840912
246	0.856803
247	0.861607
248	0.860472
249	0.840709
250	0.836635
251	0.847772
252	0.858834
253	0.864893
254	0.859872
255	0.844858
256	0.840981
257	0.843259
258	0.853652
259	0.867875
260	0.861029
261	0.844919
262	0.836139
263	0.849022
264	0.853775
265	0.85262
266	0.860313
267	0.855507
268	0.842945
269	0.838097
270	0.849991
271	0.851721
272	0.864752
273	0.858243
274	0.841822
275	0.841053
276	0.852138
277	0.855206
278	0.864495
279	0.857536
280	0.847752
281	0.849635
282	0.848935
283	0.851108
284	0.85761
285	0.854636
286	0.851555
287	0.847405
288	0.840615
289	0.849658
290	0.861989
291	0.862306
292	0.855666
293	0.845999
294	0.841742
295	0.84727
296	0.855456
297	0.860475
298	0.852886
299	0.846584
300	0.840477
301	0.843279
302	0.855755
303	0.862299
304	0.863574
305	0.85212
306	0.839456
307	0.846495
308	0.84705
309	0.858241
310	0.858053
311	0.851912
312	0.84598
313	0.845303
314	0.849182
315	0.858998
316	0.858679
317	0.852146
318	0.845707
319	0.838849
320	0.849888
321	0.855393
322	0.861879
323	0.855133
324	0.842276
325	0.846027
326	0.846275
327	0.856467
328	0.859123
329	0.854061
330	0.847931
331	0.845752
332	0.847236
333	0.850895
334	0.856715
335	0.857065
336	0.850397
337	0.84849
338	0.843726
339	0.847562
340	0.853091
341	0.859876
342	0.852857
343	0.846287
344	0.843979
345	0.846036
346	0.85314
347	0.856346
348	0.854028
349	0.848959
350	0.846941
351	0.843074
352	0.852164
353	0.854031
354	0.849441
355	0.850725
356	0.84767
357	0.847681
358	0.851905
359	0.856069
360	0.854303
361	0.854581
362	0.845574
363	0.845261
364	0.848922
365	0.852269
366	0.855763
367	0.852117
368	0.852493
369	0.844264
370	0.847588
371	0.851817
372	0.855389
373	0.854419
374	0.850725
375	0.847994
376	0.843825
377	0.851487
378	0.855654
379	0.854559
380	0.848593
381	0.850501
382	0.845763
383	0.851081
384	0.854065
385	0.856841
386	0.852514
387	0.848522
388	0.847154
389	0.84936
390	0.853981
391	0.854427
392	0.8547
393	0.849554
394	0.844776
395	0.847924
396	0.853012
397	0.855884
398	0.855182
399	0.851828
400	0.847875
401	0.849175
402	0.852364
403	0.853524
404	0.854058
405	0.851654
406	0.848024
407	0.845593
408	0.849467
409	0.853662
410	0.855116
411	0.855006
412	0.849615
413	0.847582
414	0.849175
415	0.851426
416	0.855276
417	0.855449
418	0.851672
419	0.849412
420	0.848365
421	0.849933
422	0.852161
423	0.854726
424	0.852236
425	0.848145
426	0.84824
427	0.84932
428	0.852824
429	0.855746
430	0.853197
431	0.848363
432	0.848302
433	0.847444
434	0.852868
435	0.854652
436	0.852113
437	0.848625
438	0.849376
439	0.85044
440	0.85158
441	0.853399
442	0.852378
443	0.851536
444	0.848398
445	0.847374
446	0.850485
447	0.853996
448	0.853606
449	0.852065
450	0.84861
451	0.848146
452	0.850937
453	0.852647
454	0.854372
455	0.853085
456	0.850084
457	0.849311
458	0.849944
459	0.851216
460	0.854531
461	0.852538
462	0.849168
463	0.849436
464	0.848611
465	0.852506
466	0.852166
467	0.851858
468	0.850848
469	0.848869
470	0.849019
471	0.851248
472	0.853458
473	0.852753
474	0.851913
475	0.849366
476	0.84965
477	0.850912
478	0.852524
479	0.852299
480	0.852384
481	0.851137
482	0.849201
483	0.849629
484	0.851683
485	0.853958
486	0.853013
487	0.85014
488	0.848306
489	0.849259
490	0.851637
491	0.853074
492	0.853083
493	0.851045
494	0.850235
495	0.848955
496	0.849936
497	0.852246
498	0.852652
499	0.851945
500	0.851067
501	0.848908
502	0.849257
503	0.851358
504	0.853001
505	0.853531
506	0.851216
507	0.849551
508	0.850068
509	0.851744
510	0.852929
511	0.852206
512	0.852223
513	0.849294
514	0.849613
515	0.850123
516	0.852508
517	0.852659
518	0.851619
519	0.85079
520	0.849157
521	0.851361
522	0.852374
523	0.852772
524	0.851806
525	0.851097
526	0.849897
527	0.850061
528	0.85219
529	0.853043
530	0.852135
531	0.851714
532	0.849774
533	0.849217
534	0.850921
535	0.852455
536	0.852461
537	0.85113
538	0.849543
539	0.850119
540	0.850616
541	0.851873
542	0.851843
543	0.852238
544	0.850492
545	0.850454
546	0.850065
547	0.852012
548	0.852076
549	0.851303
550	0.850844
551	0.849971
552	0.85043
553	0.851366
554	0.852691
555	0.852261
556	0.851226
557	0.849586
558	0.849908
559	0.850976
560	0.852093
561	0.851744
562	0.851949
563	0.850819
564	0.849705
565	0.850003
566	0.851869
567	0.852248
568	0.851791
569	0.850351
570	0.850886
571	0.850223
572	0.851456
573	0.851867
574	0.85125
575	0.850894
576	0.85045
577	0.850053
578	0.850956
579	0.851898
580	0.852356
581	0.851475
582	0.850717
583	0.850472
584	0.850721
585	0.852217
586	0.852311
587	0.851147
588	0.850984
589	0.849935
590	0.850998
591	0.851575
592	0.852118
593	0.851956
594	0.851277
595	0.850279
596	0.850312
597	0.85164
598	0.852136
599	0.851432
600	0.851237
601	0.850496
602	0.850201
603	0.850891
604	0.851956
605	0.852506
606	0.851718
607	0.850565
608	0.850373
609	0.850774
610	0.85159
611	0.85191
612	0.851477
613	0.850861
614	0.850338
615	0.850997
616	0.851518
617	0.852058
618	0.851724
619	0.851058
620	0.850728
621	0.8503
622	0.851568
623	0.852043
624	0.852213
625	0.851348
626	0.850873
627	0.850235
628	0.850745
629	0.851589
630	0.851618
631	0.851371
632	0.850911
633	0.850572
634	0.850769
635	0.851053
636	0.851697
637	0.851376
638	0.85105
639	0.850472
640	0.850925
641	0.851243
642	0.851835
643	0.851719
644	0.851304
645	0.850467
646	0.850778
647	0.851034
648	0.85138
649	0.851778
650	0.851141
651	0.851054
652	0.850458
653	0.851076
654	0.851692
655	0.851817
656	0.851182
657	0.850853
658	0.85089
659	0.850943
660	0.851561
661	0.85178
662	0.851741
663	0.851236
664	0.850695
665	0.850862
666	0.851233
667	0.851844
668	0.851767
669	0.851114
670	0.851035
671	0.850774
672	0.851113
673	0.851515
674	0.851769
675	0.851473
676	0.85085
677	0.85059
678	0.850949
679	0.851537
680	0.851819
681	0.851462
682	0.851115
683	0.85093
684	0.850853
685	0.851238
686	0.85159
687	0.851538
688	0.851211
689	0.85096
690	0.850838
691	0.8512
692	0.851584
693	0.851293
694	0.851323
695	0.850993
696	0.851074
697	0.851115
698	0.851339
699	0.851441
700	0.851577
701	0.851036
702	0.850588
703	0.851021
704	0.851247
705	0.851714
706	0.851476
707	0.851087
708	0.850686
709	0.850882
710	0.851041
711	0.851318
712	0.851664
713	0.851246
714	0.85086
715	0.850921
716	0.851091
717	0.851519
718	0.851311
719	0.85141
720	0.85111
721	0.850903
722	0.851018
723	0.851264
724	0.85147
725	0.851452
726	0.851094
727	0.850823
728	0.850937
729	0.851295
730	0.851523
731	0.851319
732	0.851172
733	0.850981
734	0.850975
735	0.85113
736	0.851542
737	0.851415
738	0.851249
739	0.851037
740	0.850989
741	0.851052
742	0.851367
743	0.851387
744	0.851344
745	0.851178
746	0.851006
747	0.851045
748	0.851459
749	0.851416
750	0.851325
751	0.851176
752	0.850935
753	0.850975
754	0.851269
755	0.851259
756	0.851492
757	0.851
758	0.850974
759	0.851107
760	0.851134
761	0.851295
762	0.851484
763	0.851312
764	0.851087
765	0.850998
766	0.851111
767	0.851387
768	0.851444
769	0.851588
770	0.851186
771	0.851092
772	0.850974
773	0.851248
774	0.851366
775	0.851375
776	0.851159
777	0.850977
778	0.851108
779	0.851257
780	0.851358
781	0.851398
782	0.851302
783	0.851111
784	0.850985
785	0.850987
786	0.851292
787	0.851308
788	0.851261
789	0.851346
790	0.850967
791	0.85101
792	0.851258
793	0.851266
794	0.851277
795	0.851194
796	0.851061
797	0.851108
798	0.85111
799	0.851424
800	0.851383
801	0.85133
802	0.851034
803	0.851013
804	0.851095
805	0.851313
806	0.85125
807	0.851288
808	0.851093
809	0.851034
810	0.851125
811	0.851303
812	0.851269
813	0.851308
814	0.851162
815	0.851028
816	0.851081
817	0.851168
818	0.851342
819	0.851271
820	0.851187
821	0.851028
822	0.851073
823	0.851121
824	0.851292
825	0.851379
826	0.851254
827	0.851126
828	0.851057
829	0.851201
830	0.851317
831	0.851379
832	0.851258
833	0.851174
834	0.851131
835	0.851114
836	0.851213
837	0.851364
838	0.851308
839	0.851186
840	0.851043
841	0.851092
842	0.851244
843	0.851287
844	0.851315
845	0.851215
846	0.851139
847	0.851049
848	0.851211
849	0.851292
850	0.851312
851	0.851247
852	0.851101
853	0.851088
854	0.851127
855	0.851267
856	0.851291
857	0.851308
858	0.851174
859	0.851103
860	0.8511
861	0.851263
862	0.851332
863	0.85128
864	0.851206
865	0.851184
866	0.851111
867	0.851179
868	0.851265
869	0.851341
870	0.851227
871	0.851142
872	0.851122
873	0.851179
874	0.8512
875	0.851248
876	0.851235
877	0.851167
878	0.851101
879	0.851125
880	0.851186
881	0.851291
882	0.851328
883	0.851184
884	0.851084
885	0.85113
886	0.851201
887	0.851282
888	0.851304
889	0.85121
890	0.851148
891	0.85112
892	0.851171
893	0.851236
894	0.851313
895	0.85125
896	0.851136
897	0.851094
898	0.851204
899	0.851204
900	0.851268
901	0.851236
902	0.851189
903	0.851149
904	0.851163
905	0.851193
906	0.851283
907	0.851237
908	0.851192
909	0.85117
910	0.851152
911	0.851172
912	0.851266
913	0.851276
914	0.851193
915	0.851149
916	0.851154
917	0.851202
918	0.851233
919	0.851282
920	0.851259
921	0.851119
922	0.851118
923	0.851159
924	0.851197
925	0.851235
926	0.851221
927	0.851188
928	0.851131
929	0.851141
930	0.851204
931	0.851296
932	0.851273
933	0.851199
934	0.851167
935	0.851167
936	0.851195
937	0.85122
938	0.851295
939	0.851209
940	0.851171
941	0.851154
942	0.851183
943	0.851212
944	0.851257
945	0.851238
946	0.851167
947	0.851149
948	0.851172
949	0.851203
950	0.851233

## Sheet: Wa2
0	0.749592
1	1.04367
2	0.713184
3	0.857151
4	0.659045
5	0.581635
6	0.594329
7	0.787459
8	0.860584
9	0.77459
10	0.711473
11	0.668807
12	0.650986
13	0.86651
14	0.751731
15	0.574497
16	0.546818
17	0.792809
18	0.610006
19	0.639979
20	0.714994
21	0.716663
22	0.669924
23	0.601491
24	0.621165
25	0.826501
26	0.778652
27	0.892414
28	0.796019
29	0.688207
30	0.589833
31	0.645158
32	0.73506
33	0.688321
34	0.916915
35	0.756599
36	0.589055
37	0.592598
38	0.72196
39	0.835745
40	0.744453
41	0.607865
42	0.583801
43	0.653716
44	0.795455
45	0.765492
46	0.835744
47	0.684398
48	0.660522
49	0.660233
50	0.585852
51	0.604036
52	0.800239
53	0.726796
54	0.753103
55	0.647142
56	0.655555
57	0.704723
58	0.811671
59	0.780576
60	0.746995
61	0.774983
62	0.706499
63	0.619874
64	0.771802
65	0.845918
66	0.653021
67	0.663997
68	0.578292
69	0.72719
70	0.726497
71	0.67622
72	0.756198
73	0.792899
74	0.696297
75	0.683104
76	0.904395
77	0.727091
78	0.795516
79	0.729831
80	0.702481
81	0.68578
82	0.6592
83	0.791673
84	0.757957
85	0.635359
86	0.805781
87	0.750597
88	0.716516
89	0.697815
90	0.723918
91	0.703594
92	0.678617
93	0.63313
94	0.66262
95	0.719508
96	0.714893
97	0.779999
98	0.64992
99	0.699132
100	0.784471
101	0.691338
102	0.773915
103	0.712192
104	0.690568
105	0.619388
106	0.756059
107	0.723939
108	0.743011
109	0.744027
110	0.705572
111	0.640502
112	0.676055
113	0.749546
114	0.821389
115	0.749217
116	0.632058
117	0.741205
118	0.674472
119	0.748987
120	0.766896
121	0.741846
122	0.700739
123	0.7457
124	0.652427
125	0.671378
126	0.757126
127	0.756841
128	0.683149
129	0.700836
130	0.679397
131	0.683425
132	0.726052
133	0.694712
134	0.725804
135	0.671936
136	0.712903
137	0.721676
138	0.700057
139	0.743657
140	0.760916
141	0.736913
142	0.713277
143	0.678929
144	0.711017
145	0.688861
146	0.753161
147	0.762826
148	0.698384
149	0.686986
150	0.74665
151	0.712045
152	0.740774
153	0.752548
154	0.687796
155	0.697889
156	0.72016
157	0.721134
158	0.736682
159	0.694155
160	0.689453
161	0.645304
162	0.665075
163	0.711872
164	0.724189
165	0.711726
166	0.779968
167	0.687868
168	0.691838
169	0.699114
170	0.72371
171	0.752779
172	0.676602
173	0.673741
174	0.65557
175	0.704016
176	0.713338
177	0.729648
178	0.731229
179	0.737149
180	0.688519
181	0.660185
182	0.686593
183	0.702623
184	0.703911
185	0.720245
186	0.670081
187	0.688305
188	0.7296
189	0.69705
190	0.722922
191	0.704076
192	0.684507
193	0.721122
194	0.687632
195	0.693535
196	0.7073
197	0.711897
198	0.714088
199	0.682163
200	0.71696
201	0.706553
202	0.730198
203	0.706247
204	0.70663
205	0.705995
206	0.682959
207	0.693846
208	0.719648
209	0.726349
210	0.698291
211	0.707693
212	0.717477
213	0.729448
214	0.692012
215	0.749879
216	0.746708
217	0.714969
218	0.686321
219	0.710504
220	0.715595
221	0.707067
222	0.718395
223	0.707106
224	0.711238
225	0.701452
226	0.696953
227	0.737275
228	0.740606
229	0.717652
230	0.711991
231	0.704267
232	0.707761
233	0.695969
234	0.739278
235	0.706251
236	0.704204
237	0.709266
238	0.719187
239	0.697197
240	0.718137
241	0.703857
242	0.725979
243	0.699568
244	0.694785
245	0.686623
246	0.706057
247	0.715914
248	0.731605
249	0.70299
250	0.698276
251	0.711136
252	0.716939
253	0.723818
254	0.723865
255	0.707722
256	0.709078
257	0.704977
258	0.709857
259	0.732738
260	0.722088
261	0.701578
262	0.694545
263	0.723577
264	0.716477
265	0.696742
266	0.717181
267	0.722398
268	0.708324
269	0.697996
270	0.712729
271	0.698697
272	0.727046
273	0.72376
274	0.700944
275	0.706015
276	0.723142
277	0.712429
278	0.726623
279	0.717452
280	0.710785
281	0.72648
282	0.718922
283	0.707363
284	0.711103
285	0.70698
286	0.715112
287	0.71847
288	0.700717
289	0.708824
290	0.72489
291	0.724201
292	0.720462
293	0.711587
294	0.704698
295	0.70746
296	0.712422
297	0.719176
298	0.709438
299	0.709042
300	0.701419
301	0.70138
302	0.717314
303	0.724437
304	0.732415
305	0.718355
306	0.697586
307	0.71195
308	0.700293
309	0.716396
310	0.716764
311	0.713681
312	0.711152
313	0.710592
314	0.709488
315	0.720939
316	0.717291
317	0.710527
318	0.707466
319	0.695438
320	0.714608
321	0.71547
322	0.725096
323	0.714664
324	0.695862
325	0.712087
326	0.708586
327	0.721488
328	0.719555
329	0.709884
330	0.705979
331	0.70989
332	0.712644
333	0.711577
334	0.715704
335	0.715743
336	0.708608
337	0.714163
338	0.705152
339	0.706758
340	0.709599
341	0.721996
342	0.711622
343	0.706309
344	0.705698
345	0.705719
346	0.712512
347	0.714173
348	0.712183
349	0.709755
350	0.711765
351	0.700672
352	0.713072
353	0.710009
354	0.700048
355	0.711096
356	0.711913
357	0.712509
358	0.715137
359	0.716548
360	0.71068
361	0.717504
362	0.705061
363	0.707235
364	0.710557
365	0.709942
366	0.714099
367	0.709736
368	0.718716
369	0.704583
370	0.709318
371	0.711246
372	0.713947
373	0.713492
374	0.712316
375	0.712129
376	0.701979
377	0.712784
378	0.715792
379	0.712902
380	0.705284
381	0.716344
382	0.707011
383	0.713929
384	0.713821
385	0.717772
386	0.712261
387	0.710091
388	0.710147
389	0.711762
390	0.71548
391	0.712631
392	0.715667
393	0.710512
394	0.704271
395	0.709814
396	0.715203
397	0.716686
398	0.71571
399	0.71371
400	0.710194
401	0.713359
402	0.715552
403	0.712619
404	0.712705
405	0.711617
406	0.709201
407	0.705686
408	0.710709
409	0.714362
410	0.715036
411	0.71758
412	0.711197
413	0.70985
414	0.711314
415	0.71101
416	0.715823
417	0.717471
418	0.714131
419	0.713207
420	0.710394
421	0.709303
422	0.709848
423	0.715239
424	0.713863
425	0.709487
426	0.710553
427	0.709391
428	0.71238
429	0.717215
430	0.714635
431	0.708796
432	0.710703
433	0.706538
434	0.713714
435	0.715019
436	0.711273
437	0.708104
438	0.71265
439	0.713843
440	0.712234
441	0.712851
442	0.711147
443	0.713067
444	0.709904
445	0.707843
446	0.711124
447	0.714899
448	0.713402
449	0.713033
450	0.709482
451	0.709681
452	0.71315
453	0.712998
454	0.71499
455	0.714213
456	0.711583
457	0.712003
458	0.711904
459	0.711037
460	0.715594
461	0.71234
462	0.708623
463	0.711844
464	0.709706
465	0.714764
466	0.711189
467	0.710486
468	0.711135
469	0.710034
470	0.710867
471	0.713089
472	0.714589
473	0.712188
474	0.712465
475	0.710289
476	0.712196
477	0.713186
478	0.71348
479	0.711362
480	0.712732
481	0.713078
482	0.71105
483	0.711149
484	0.712613
485	0.715093
486	0.71353
487	0.710194
488	0.708799
489	0.710769
490	0.713337
491	0.713798
492	0.713411
493	0.711262
494	0.712138
495	0.710301
496	0.710617
497	0.712756
498	0.712511
499	0.712425
500	0.713136
501	0.710136
502	0.709838
503	0.711669
504	0.713389
505	0.715107
506	0.712726
507	0.711161
508	0.711872
509	0.713138
510	0.71359
511	0.712145
512	0.714049
513	0.710237
514	0.711183
515	0.71056
516	0.713225
517	0.712924
518	0.712252
519	0.712681
520	0.710317
521	0.713547
522	0.713506
523	0.713204
524	0.712142
525	0.71271
526	0.711634
527	0.711399
528	0.713715
529	0.713944
530	0.712451
531	0.71334
532	0.711115
533	0.710018
534	0.711791
535	0.713133
536	0.712905
537	0.711676
538	0.710287
539	0.711879
540	0.711693
541	0.712428
542	0.711681
543	0.713369
544	0.711674
545	0.712479
546	0.711032
547	0.71316
548	0.712245
549	0.711234
550	0.711878
551	0.711378
552	0.712012
553	0.712389
554	0.713645
555	0.712851
556	0.712153
557	0.710376
558	0.711172
559	0.71208
560	0.71282
561	0.711782
562	0.713118
563	0.71237
564	0.710821
565	0.710614
566	0.712762
567	0.712766
568	0.71249
569	0.711108
570	0.712954
571	0.711315
572	0.712372
573	0.712189
574	0.711248
575	0.711745
576	0.711951
577	0.711181
578	0.711813
579	0.712472
580	0.713181
581	0.71247
582	0.712192
583	0.712038
584	0.711712
585	0.713341
586	0.713068
587	0.711561
588	0.712383
589	0.711026
590	0.712493
591	0.712468
592	0.712781
593	0.712817
594	0.712602
595	0.711551
596	0.711428
597	0.712898
598	0.712958
599	0.711709
600	0.712221
601	0.711766
602	0.711337
603	0.711827
604	0.712837
605	0.713595
606	0.712819
607	0.711664
608	0.711676
609	0.711868
610	0.712419
611	0.712532
612	0.712159
613	0.711944
614	0.71156
615	0.712461
616	0.712547
617	0.712885
618	0.712444
619	0.712041
620	0.712139
621	0.71134
622	0.712886
623	0.713001
624	0.713222
625	0.712315
626	0.712228
627	0.711285
628	0.71165
629	0.712381
630	0.712144
631	0.712149
632	0.712094
633	0.711872
634	0.711878
635	0.711646
636	0.712327
637	0.712001
638	0.712126
639	0.711626
640	0.712284
641	0.712193
642	0.712665
643	0.712497
644	0.712362
645	0.711501
646	0.712103
647	0.712027
648	0.712011
649	0.712551
650	0.711895
651	0.712368
652	0.711568
653	0.712269
654	0.712713
655	0.712626
656	0.711817
657	0.711852
658	0.71228
659	0.712172
660	0.712659
661	0.712617
662	0.712665
663	0.712336
664	0.711868
665	0.71212
666	0.712267
667	0.712821
668	0.712644
669	0.711965
670	0.712335
671	0.712011
672	0.712215
673	0.712383
674	0.712629
675	0.712434
676	0.711889
677	0.711695
678	0.712063
679	0.712559
680	0.712737
681	0.712305
682	0.712193
683	0.712221
684	0.711994
685	0.712198
686	0.712414
687	0.71236
688	0.712213
689	0.712194
690	0.712022
691	0.712269
692	0.712495
693	0.711918
694	0.712275
695	0.712147
696	0.712428
697	0.712243
698	0.712197
699	0.712168
700	0.71259
701	0.712103
702	0.711607
703	0.712178
704	0.712163
705	0.712652
706	0.712347
707	0.712072
708	0.71172
709	0.712011
710	0.71194
711	0.712068
712	0.712607
713	0.712222
714	0.711932
715	0.712104
716	0.712127
717	0.712477
718	0.712022
719	0.712391
720	0.712248
721	0.712073
722	0.712094
723	0.712157
724	0.712295
725	0.712383
726	0.712127
727	0.711917
728	0.712027
729	0.712303
730	0.71242
731	0.712121
732	0.712158
733	0.712118
734	0.712126
735	0.71213
736	0.712508
737	0.71225
738	0.712195
739	0.712141
740	0.712159
741	0.712085
742	0.712303
743	0.712206
744	0.712275
745	0.712286
746	0.712174
747	0.712135
748	0.712525
749	0.712275
750	0.712194
751	0.712204
752	0.71203
753	0.712069
754	0.712303
755	0.712071
756	0.712423
757	0.711857
758	0.712042
759	0.712294
760	0.712163
761	0.712182
762	0.712399
763	0.712278
764	0.71216
765	0.712125
766	0.712185
767	0.712387
768	0.712346
769	0.712651
770	0.712248
771	0.712251
772	0.712018
773	0.712236
774	0.712253
775	0.712288
776	0.712144
777	0.712042
778	0.712249
779	0.71231
780	0.712281
781	0.712305
782	0.712303
783	0.712202
784	0.712071
785	0.711954
786	0.712228
787	0.712169
788	0.712192
789	0.712504
790	0.712037
791	0.712032
792	0.712228
793	0.712121
794	0.712182
795	0.712223
796	0.712157
797	0.712209
798	0.71206
799	0.712384
800	0.712319
801	0.712375
802	0.712085
803	0.712082
804	0.712085
805	0.712255
806	0.712112
807	0.712269
808	0.712133
809	0.712114
810	0.712169
811	0.712281
812	0.712147
813	0.712263
814	0.712193
815	0.712094
816	0.712134
817	0.712125
818	0.712272
819	0.712185
820	0.712187
821	0.712073
822	0.712141
823	0.712099
824	0.712225
825	0.712329
826	0.712247
827	0.712186
828	0.712125
829	0.712252
830	0.712293
831	0.712328
832	0.712219
833	0.712221
834	0.712227
835	0.712153
836	0.712177
837	0.712315
838	0.712267
839	0.712204
840	0.712087
841	0.712142
842	0.712256
843	0.712222
844	0.712261
845	0.712211
846	0.712204
847	0.712092
848	0.712241
849	0.712253
850	0.712251
851	0.712226
852	0.712124
853	0.712149
854	0.712149
855	0.712245
856	0.712224
857	0.712288
858	0.712198
859	0.712164
860	0.712132
861	0.712269
862	0.712292
863	0.712233
864	0.712214
865	0.712262
866	0.71216
867	0.712178
868	0.712216
869	0.712309
870	0.712218
871	0.712184
872	0.71218
873	0.712203
874	0.712147
875	0.712178
876	0.712206
877	0.712195
878	0.712149
879	0.712147
880	0.712152
881	0.712244
882	0.712317
883	0.712195
884	0.712117
885	0.712169
886	0.712196
887	0.712243
888	0.712274
889	0.712208
890	0.712191
891	0.712163
892	0.712176
893	0.712196
894	0.712281
895	0.712243
896	0.712157
897	0.712128
898	0.71224
899	0.712171
900	0.712222
901	0.712207
902	0.71221
903	0.712199
904	0.712198
905	0.712175
906	0.712249
907	0.712197
908	0.712194
909	0.712217
910	0.712192
911	0.712167
912	0.712236
913	0.712243
914	0.712179
915	0.712177
916	0.712199
917	0.712222
918	0.712208
919	0.712249
920	0.712251
921	0.712122
922	0.712149
923	0.71218
924	0.712175
925	0.712191
926	0.712189
927	0.712197
928	0.712161
929	0.712166
930	0.7122
931	0.712279
932	0.71225
933	0.712196
934	0.7122
935	0.712205
936	0.712203
937	0.712189
938	0.712275
939	0.712195
940	0.712193
941	0.712189
942	0.7122
943	0.712192
944	0.712226
945	0.712221
946	0.712174
947	0.71218
948	0.712195
949	0.712194
950	0.7122
