# Supplementary material for: Spatial layout optimization model integrating layered attention mechanism in the development of smart tourism management
Source: PeerJ Comput Sci. 2024 Oct 9;10:e2329. doi: 10.7717/peerj-cs.2329 (PMC11623231; doi:10.7717/peerj-cs.2329)
Supplement: Supplemental Information 3 [file peerj-cs-10-2329-s003.xlsx]

## Sheet: The forbidden city
		%
MAE	38.55	19.275
	27.25	13.625
	30.75	15.375
	27.25	13.625
RMSE	24.75	12.375
	22.25	11.125
	19.275	9.6375
	15.75	7.875
MAPE	33.25	16.625
	24.75	12.375
	28.75	14.375
	22.25	11.125
R2	27.25	13.625
	19.275	9.6375
	24.75	12.375
	22.25	11.125

## Sheet: Zhongshan park
		%
MAE	32.95	16.475
	30.45	15.225
	27.95	13.975
	28.95	14.475
RMSE	27.45	13.725
	24.95	12.475
	25.95	12.975
	20.45	10.225
MAPE	25.45	12.725
	16.95	8.475
	22.95	11.475
	20.45	10.225
R2	31.075	15.5375
	24.875	12.4375
	18.075	9.0375
	22.25	11.125

## Sheet: National Museum
		%
MAE	34.55	17.275
	22.95	11.475
	17.95	8.975
	26.15	13.075
RMSE	27.95	13.975
	22.25	11.125
	21.45	10.725
	18.95	9.475
MAPE	22.95	11.475
	15.75	7.875
	17.45	8.725
	18.95	9.475
R2	23.075	11.5375
	18.075	9.0375
	20.575	10.2875
	15.275	7.6375

## Sheet: Beihai park
		%
MAE	34.55	17.275
	22.95	11.475
	17.95	8.975
	26.15	13.075
RMSE	27.95	13.975
	22.25	11.125
	21.45	10.725
	18.95	9.475
MAPE	22.95	11.475
	15.75	7.875
	17.45	8.725
	18.95	9.475
R2	23.075	11.5375
	18.075	9.0375
	20.575	10.2875
	15.275	7.6375

## Sheet: Jingshan park
		%
MAE	32.15	16.075
	27.95	13.975
	21.25	10.625
	23.9	11.95
RMSE	24.75	12.375
	22.25	11.125
	20.95	10.475
	15.75	7.875
MAPE	28.95	14.475
	24.75	12.375
	16.95	8.475
	22.25	11.125
R2	27.25	13.625
	21.075	10.5375
	16.075	8.0375
	16.075	8.0375

## Sheet: National zoo
		%
MAE	35.95	17.975
	21.45	10.725
	25.45	12.725
	27.25	13.625
RMSE	27.95	13.975
	24.45	12.225
	20.45	10.225
	21.95	10.975
MAPE	27.95	13.975
	20.45	10.225
	23.95	11.975
	22.25	11.125
R2	30.075	15.0375
	23.075	11.5375
	21.575	10.7875
	22.25	11.125
