# Supplementary material for: Spatial layout optimization model integrating layered attention mechanism in the development of smart tourism management
Source: PeerJ Comput Sci. 2024 Oct 9;10:e2329. doi: 10.7717/peerj-cs.2329 (PMC11623231; doi:10.7717/peerj-cs.2329)
Supplement: Supplemental Information 4 [file peerj-cs-10-2329-s004.xlsx]

## Sheet: The forbidden city
	Predictive value	Actual value
0	3312.74	3511.51
1	3954.73	4192.01
2	2928.86	3104.59
3	3606.46	3822.84
4	3262.04	3457.77
5	3077.34	3261.98
6	2909.13	3083.68
7	3243.58	3438.2
8	3382.49	3585.44
9	3279.73	3476.51
10	3361.63	3563.33
11	3357.06	3558.48
12	3156.16	3345.53
13	3596.32	3812.1
14	3036.52	3218.71
15	2528.73	2680.45
16	2710.93	2873.58
17	3773.1	3999.49
18	3064.12	3247.97
19	2896.45	3070.24
20	2934.82	3110.91
21	2963.99	3141.83
22	3047.29	3230.13
23	3044.58	3227.25
24	3132.38	3320.32
25	3671.49	3891.78
26	3223.26	3416.66
27	3604.47	3820.74
28	3443.47	3650.08
29	3306.18	3504.55
30	3014.59	3195.47
31	3054.63	3237.91
32	3125.67	3313.21
33	2801.62	2969.72
34	3878.68	4111.4
35	3512.54	3723.29
36	2985.66	3164.8
37	2890.92	3064.38
38	3152.07	3341.19
39	3438.54	3644.85
40	3114.73	3301.61
41	2792.85	2960.42
42	2911.37	3086.05
43	3191.12	3382.59
44	3567.65	3781.71
45	3184.35	3375.41
46	3491.64	3701.14
47	3034.78	3216.86
48	3191.63	3383.13
49	3244.03	3438.68
50	2681.66	2842.56
51	2481.82	2630.73
52	3326.39	3525.97
53	3151.53	3340.63
54	3568.98	3783.12
55	3179.64	3370.42
56	3074.54	3259.01
57	3030.83	3212.68
58	3406.12	3610.48
59	3358.62	3560.14
60	3471.93	3680.25
61	3819.07	4048.21
62	3392.84	3596.41
63	2658.77	2818.3
64	3242.28	3436.82
65	3674.4	3894.86
66	2884.83	3057.92
67	3192.33	3383.87
68	2726.18	2889.75
69	3318.71	3517.83
70	3047.6	3230.46
71	2707.72	2870.18
72	3377.07	3579.7
73	3873.41	4105.82
74	3403.7	3607.92
75	3144.62	3333.3
76	4177.74	4428.4
77	2988.42	3167.72
78	3551.91	3765.03
79	3442.14	3648.66
80	3439.47	3645.83
81	3224.78	3418.27
82	2771.29	2937.57
83	3413.78	3618.61
84	3272.76	3469.13
85	2755.2	2920.51
86	4090.27	4335.68
87	3701.1	3923.17
88	3218.06	3411.14
89	2844.06	3014.7
90	3009.87	3190.46
91	3109.18	3295.74
92	3203.27	3395.47
93	2935.34	3111.46
94	2925.59	3101.13
95	3045.8	3228.55
96	2922.7	3098.06
97	3574.95	3789.45
98	2919.25	3094.41
99	3405.23	3609.54
100	3888.64	4121.96
101	2907.6	3082.05
102	3366.04	3568
103	3012.1	3192.83
104	3130.67	3318.51
105	2772.65	2939.01
106	3762.54	3988.3
107	3237.01	3431.23
108	3166.1	3356.07
109	3209.69	3402.27
110	3159.56	3349.13
111	2873.63	3046.05
112	3169.73	3359.91
113	3540.64	3753.08
114	3881.8	4114.7
115	3229.13	3422.88
116	2442.26	2588.79
117	3658.61	3878.13
118	3167.08	3357.1
119	3635.67	3853.81
120	3510.56	3721.2
121	3164.44	3354.3
122	2946.02	3122.79
123	3644.24	3862.89
124	2950.06	3127.06
125	3006.63	3187.02
126	3521.51	3732.8
127	3328.86	3528.59
128	2705.42	2867.74
129	3148.93	3337.86
130	3161.77	3351.47
131	3162.64	3352.4
132	3321.01	3520.27
133	2763.45	2929.26
134	3069.89	3254.08
135	2764.2	2930.05
136	3445.54	3652.27
137	3582.22	3797.15
138	3141.99	3330.5
139	3321.5	3520.79
140	3422.28	3627.62
141	3355.56	3556.89
142	3388.89	3592.22
143	3137.68	3325.94
144	3335.01	3535.11
145	2799.46	2967.43
146	3359.1	3560.65

## Sheet: Zhongshan park
	Predictive value	Actual value
0	1850.42	1924.44
1	2137.52	2223.03
2	1678.74	1745.89
3	1981.77	2061.04
4	1827.75	1900.86
5	1745.14	1814.95
6	1669.92	1736.72
7	1819.49	1892.27
8	1881.61	1956.88
9	1835.65	1909.08
10	1872.28	1947.17
11	1870.24	1945.05
12	1780.4	1851.61
13	1977.24	2056.33
14	1726.89	1795.96
15	1499.8	1559.79
16	1581.28	1644.53
17	2056.3	2138.55
18	1739.23	1808.8
19	1664.25	1730.82
20	1681.41	1748.66
21	1694.45	1762.23
22	1731.71	1800.98
23	1730.49	1799.71
24	1769.76	1840.55
25	2010.86	2091.29
26	1810.4	1882.82
27	1980.89	2060.12
28	1908.88	1985.24
29	1847.48	1921.38
30	1717.08	1785.77
31	1734.99	1804.39
32	1766.76	1837.43
33	1621.84	1686.71
34	2103.51	2187.65
35	1939.77	2017.36
36	1704.15	1772.31
37	1661.78	1728.25
38	1778.57	1849.71
39	1906.68	1982.95
40	1761.87	1832.34
41	1617.92	1682.63
42	1670.92	1737.76
43	1796.03	1867.87
44	1964.42	2043
45	1793	1864.72
46	1930.42	2007.64
47	1726.11	1795.15
48	1796.26	1868.11
49	1819.69	1892.48
50	1568.19	1630.92
51	1478.82	1537.97
52	1856.52	1930.78
53	1778.33	1849.46
54	1965.02	2043.62
55	1790.9	1862.53
56	1743.89	1813.65
57	1724.35	1793.32
58	1892.18	1967.87
59	1870.94	1945.78
60	1921.61	1998.48
61	2076.86	2159.93
62	1886.24	1961.69
63	1557.96	1620.27
64	1818.91	1891.67
65	2012.16	2092.64
66	1659.05	1725.41
67	1796.57	1868.43
68	1588.1	1651.62
69	1853.09	1927.21
70	1731.85	1801.12
71	1579.84	1643.04
72	1879.19	1954.36
73	2101.16	2185.21
74	1850.42	1924.44
75	2137.52	2223.03
76	1678.74	1745.89
77	1981.77	2061.04
78	1827.75	1900.86
79	1745.14	1814.95
80	1669.92	1736.72
81	1819.49	1892.27
82	1881.61	1956.88
83	1835.65	1909.08
84	1872.28	1947.17
85	1870.24	1945.05
86	1780.4	1851.61
87	1977.24	2056.33
88	1726.89	1795.96
89	1499.8	1559.79
90	1581.28	1644.53
91	2056.3	2138.55
92	1739.23	1808.8
93	1664.25	1730.82
94	1681.41	1748.66
95	1694.45	1762.23
96	1731.71	1800.98
97	1730.49	1799.71
98	1769.76	1840.55
99	2010.86	2091.29
100	1810.4	1882.82
101	1980.89	2060.12
102	1908.88	1985.24
103	1847.48	1921.38
104	1717.08	1785.77
105	1734.99	1804.39
106	1766.76	1837.43
107	1621.84	1686.71
108	2103.51	2187.65
109	1939.77	2017.36
110	1704.15	1772.31
111	1661.78	1728.25
112	1778.57	1849.71
113	1906.68	1982.95
114	1761.87	1832.34
115	1617.92	1682.63
116	1670.92	1737.76
117	1796.03	1867.87
118	1964.42	2043
119	1793	1864.72
120	1930.42	2007.64
121	1726.11	1795.15
122	1796.26	1868.11
123	1819.69	1892.48
124	1568.19	1630.92
125	1478.82	1537.97
126	1856.52	1930.78
127	1778.33	1849.46
128	1965.02	2043.62
129	1790.9	1862.53
130	1743.89	1813.65
131	1724.35	1793.32
132	1892.18	1967.87
133	1870.94	1945.78
134	1921.61	1998.48
135	2076.86	2159.93
136	1886.24	1961.69
137	1557.96	1620.27
138	1818.91	1891.67
139	2012.16	2092.64
140	1659.05	1725.41
141	1796.57	1868.43
142	1588.1	1651.62
143	1853.09	1927.21
144	1731.85	1801.12
145	1579.84	1643.04
146	1879.19	1954.36

## Sheet: National Museum
	Predictive value	Actual value
0	1596.03	1624.75
1	1858.12	1891.56
2	1439.31	1465.21
3	1715.93	1746.82
4	1575.33	1603.68
5	1499.92	1526.92
6	1431.25	1457.02
7	1567.79	1596.01
8	1624.5	1653.74
9	1582.55	1611.03
10	1615.99	1645.07
11	1614.12	1643.17
12	1532.1	1559.68
13	1711.8	1742.61
14	1483.26	1509.96
15	1275.96	1298.92
16	1350.34	1374.64
17	1783.97	1816.08
18	1494.53	1521.43
19	1426.08	1451.74
20	1441.74	1467.69
21	1453.65	1479.82
22	1487.66	1514.44
23	1486.55	1513.31
24	1522.39	1549.8
25	1742.49	1773.85
26	1559.5	1587.57
27	1715.12	1746
28	1649.4	1679.09
29	1593.35	1622.03
30	1474.31	1500.84
31	1490.65	1517.49
32	1519.65	1547.01
33	1387.36	1412.33
34	1827.07	1859.96
35	1677.59	1707.79
36	1462.5	1488.82
37	1423.82	1449.45
38	1530.43	1557.98
39	1647.38	1677.04
40	1515.19	1542.46
41	1383.78	1408.69
42	1432.17	1457.94
43	1546.38	1574.21
44	1700.09	1730.69
45	1543.61	1571.4
46	1669.06	1699.1
47	1482.55	1509.23
48	1546.58	1574.42
49	1567.98	1596.2
50	1338.39	1362.48
51	1256.81	1279.43
52	1601.6	1630.43
53	1530.21	1557.76
54	1700.64	1731.25
55	1541.69	1569.44
56	1498.78	1525.76
57	1480.94	1507.6
58	1634.15	1663.56
59	1614.76	1643.82
60	1661.02	1690.91
61	1802.73	1835.18
62	1628.73	1658.04
63	1329.05	1352.97
64	1567.26	1595.47
65	1743.67	1775.06
66	1421.33	1446.92
67	1546.87	1574.71
68	1356.56	1380.98
69	1598.46	1627.24
70	1487.78	1514.56
71	1349.03	1373.31
72	1622.29	1651.49
73	1824.92	1857.77
74	1633.16	1662.56
75	1527.39	1554.89
76	1949.16	1984.25
77	1463.62	1489.97
78	1693.67	1724.15
79	1648.85	1678.53
80	1647.76	1677.42
81	1560.12	1588.2
82	1374.98	1399.73
83	1637.28	1666.75
84	1579.7	1608.14
85	1368.41	1393.04
86	1913.45	1947.89
87	1754.57	1786.16
88	1557.37	1585.41
89	1404.69	1429.97
90	1472.38	1498.88
91	1512.92	1540.16
92	1551.33	1579.26
93	1441.95	1467.91
94	1437.97	1463.86
95	1487.05	1513.81
96	1436.79	1462.65
97	1703.07	1733.73
98	1596.03	1624.75
99	1858.12	1891.56
100	1439.31	1465.21
101	1715.93	1746.82
102	1575.33	1603.68
103	1499.92	1526.92
104	1431.25	1457.02
105	1567.79	1596.01
106	1624.5	1653.74
107	1582.55	1611.03
108	1615.99	1645.07
109	1614.12	1643.17
110	1532.1	1559.68
111	1711.8	1742.61
112	1483.26	1509.96
113	1275.96	1298.92
114	1350.34	1374.64
115	1783.97	1816.08
116	1494.53	1521.43
117	1426.08	1451.74
118	1441.74	1467.69
119	1453.65	1479.82
120	1487.66	1514.44
121	1486.55	1513.31
122	1522.39	1549.8
123	1742.49	1773.85
124	1559.5	1587.57
125	1715.12	1746
126	1649.4	1679.09
127	1593.35	1622.03
128	1474.31	1500.84
129	1490.65	1517.49
130	1519.65	1547.01
131	1387.36	1412.33
132	1827.07	1859.96
133	1677.59	1707.79
134	1462.5	1488.82
135	1423.82	1449.45
136	1530.43	1557.98
137	1647.38	1677.04
138	1515.19	1542.46
139	1383.78	1408.69
140	1432.17	1457.94
141	1546.38	1574.21
142	1700.09	1730.69
143	1543.61	1571.4
144	1669.06	1699.1
145	1482.55	1509.23
146	1546.58	1574.42

## Sheet: Jingshan park
	Predictive value	Actual value
0	1533.82	1595.18
1	1726.42	1795.48
2	1418.66	1475.4
3	1621.94	1686.81
4	1518.61	1579.36
5	1463.2	1521.73
6	1412.74	1469.25
7	1513.07	1573.6
8	1554.75	1616.94
9	1523.92	1584.87
10	1548.49	1610.43
11	1547.12	1609
12	1486.85	1546.32
13	1618.9	1683.65
14	1450.95	1508.99
15	1298.62	1350.56
16	1353.28	1407.41
17	1671.93	1738.81
18	1459.24	1517.61
19	1408.93	1465.29
20	1420.45	1477.26
21	1429.2	1486.37
22	1454.19	1512.36
23	1453.37	1511.51
24	1479.71	1538.9
25	1641.45	1707.11
26	1506.98	1567.26
27	1621.34	1686.2
28	1573.04	1635.96
29	1531.85	1593.13
30	1444.38	1502.15
31	1456.39	1514.65
32	1477.7	1536.81
33	1380.49	1435.71
34	1703.6	1771.75
35	1593.76	1657.51
36	1435.7	1493.13
37	1407.28	1463.57
38	1485.62	1545.05
39	1571.56	1634.42
40	1474.42	1533.4
41	1377.85	1432.97
42	1413.41	1469.95
43	1497.34	1557.23
44	1610.3	1674.71
45	1495.31	1555.12
46	1587.49	1650.99
47	1450.43	1508.45
48	1497.49	1557.39
49	1513.21	1573.74
50	1344.5	1398.28
51	1284.55	1335.93
52	1537.92	1599.43
53	1485.46	1544.88
54	1610.7	1675.12
55	1493.89	1553.65
56	1462.36	1520.86
57	1449.25	1507.22
58	1561.84	1624.31
59	1547.59	1609.49
60	1581.58	1644.84
61	1685.72	1753.15
62	1557.85	1620.17
63	1337.63	1391.14
64	1512.68	1573.19
65	1642.32	1708.01
66	1405.45	1461.67
67	1497.7	1557.61
68	1357.85	1412.17
69	1535.61	1597.04
70	1454.28	1512.45
71	1352.32	1406.41
72	1553.12	1615.25
73	1702.02	1770.11
74	1561.11	1623.56
75	1483.39	1542.72
76	1793.32	1865.05
77	1436.53	1493.99
78	1605.57	1669.8
79	1572.64	1635.55
80	1571.84	1634.71
81	1507.43	1567.73
82	1371.39	1426.24
83	1564.13	1626.7
84	1521.83	1582.7
85	1366.56	1421.22
86	1767.08	1837.76
87	1650.33	1716.34
88	1505.42	1565.63
89	1393.22	1448.95
90	1442.96	1500.68
91	1472.76	1531.67
92	1500.98	1561.02
93	1420.6	1477.43
94	1417.68	1474.38
95	1453.74	1511.89
96	1416.81	1473.48
97	1612.48	1676.98
98	1415.78	1472.41
99	1561.57	1624.03
100	1706.59	1774.86
101	1412.28	1468.77
102	1549.81	1611.8
103	1443.63	1501.38
104	1479.2	1538.37
105	1371.8	1426.67
106	1668.76	1735.51
107	1511.1	1571.55
108	1489.83	1549.42
109	1502.91	1563.02
110	1487.87	1547.38
111	1402.09	1458.17
112	1490.92	1550.55
113	1602.19	1666.28
114	1704.54	1772.72
115	1508.74	1569.09
116	1272.68	1323.58
117	1637.58	1703.09
118	1490.12	1549.73
119	1630.7	1695.93
120	1593.17	1656.9
121	1489.33	1548.9
122	1423.81	1480.76
123	1633.27	1698.6
124	1425.02	1482.02
125	1441.99	1499.67
126	1596.45	1660.31
127	1538.66	1600.2
128	1351.62	1405.69
129	1484.68	1544.07
130	1488.53	1548.07
131	1488.79	1548.34
132	1536.3	1597.75
133	1369.04	1423.8
134	1460.97	1519.41
135	1369.26	1424.03
136	1573.66	1636.61
137	1614.67	1679.25
138	1482.6	1541.9
139	1536.45	1597.91
140	1566.68	1629.35
141	1546.67	1608.53
142	1556.67	1618.93
143	1481.3	1540.56
144	1540.5	1602.12
145	1379.84	1435.03
146	1547.73	1609.64

## Sheet: Beihai park
	Predictive value	Actual value
0	1017.83	1058.54
1	1119.33	1164.11
2	957.129	995.414
3	1064.27	1106.84
4	1009.81	1050.2
5	980.605	1019.83
6	954.01	992.17
7	1006.89	1047.17
8	1028.85	1070.01
9	1012.61	1053.11
10	1025.56	1066.58
11	1024.83	1065.83
12	993.069	1032.79
13	1062.66	1105.17
14	974.151	1013.12
15	893.863	929.617
16	922.671	959.578
17	1090.62	1134.24
18	978.515	1017.66
19	952.004	990.084
20	958.072	996.394
21	962.684	1001.19
22	975.855	1014.89
23	975.425	1014.44
24	989.309	1028.88
25	1074.55	1117.53
26	1003.68	1043.83
27	1063.95	1106.51
28	1038.5	1080.04
29	1016.79	1057.46
30	970.684	1009.51
31	977.016	1016.1
32	988.247	1027.78
33	937.011	974.491
34	1107.31	1151.6
35	1049.42	1091.39
36	966.11	1004.75
37	951.131	989.176
38	992.422	1032.12
39	1037.72	1079.23
40	986.517	1025.98
41	935.624	973.049
42	954.363	992.537
43	998.597	1038.54
44	1058.13	1100.46
45	997.526	1037.43
46	1046.11	1087.96
47	973.876	1012.83
48	998.677	1038.62
49	1006.96	1047.24
50	918.043	954.764
51	886.446	921.904
52	1019.98	1060.78
53	992.337	1032.03
54	1058.34	1100.68
55	996.781	1036.65
56	980.163	1019.37
57	973.253	1012.18
58	1032.59	1073.89
59	1025.08	1066.08
60	1043	1084.72
61	1097.88	1141.8
62	1030.49	1071.71
63	914.425	951.002
64	1006.69	1046.95
65	1075.01	1118.01
66	950.167	988.174
67	998.787	1038.74
68	925.082	962.085
69	1018.77	1059.52
70	975.904	1014.94
71	922.163	959.05
72	1028	1069.12
73	1106.48	1150.74
74	1032.21	1073.5
75	991.244	1030.89
76	1154.59	1200.78
77	966.546	1005.21
78	1055.64	1097.87
79	1038.29	1079.82
80	1037.86	1079.38
81	1003.92	1044.08
82	932.215	969.504
83	1033.8	1075.15
84	1011.5	1051.96
85	929.671	966.858
86	1140.76	1186.39
87	1079.23	1122.4
88	1002.86	1042.97
89	943.72	981.469
90	969.938	1008.74
91	985.641	1025.07
92	1000.52	1040.54
93	958.153	996.479
94	956.612	994.876
95	975.619	1014.64
96	956.155	994.401
97	1059.28	1101.66
98	955.61	993.835
99	1032.45	1073.75
100	1108.88	1153.24
101	953.767	991.918
102	1026.25	1067.3
103	970.291	1009.1
104	989.038	1028.6
105	932.431	969.728
106	1088.95	1132.5
107	1005.85	1046.09
108	994.64	1034.43
109	1001.53	1041.59
110	993.606	1033.35
111	948.396	986.332
112	995.213	1035.02
113	1053.86	1096.01
114	1107.8	1152.11
115	1004.61	1044.79
116	880.19	915.398
117	1072.51	1115.41
118	994.794	1034.59
119	1068.89	1111.64
120	1049.1	1091.07
121	994.377	1034.15
122	959.843	998.237
123	1070.24	1113.05
124	960.481	998.9
125	969.425	1008.2
126	1050.84	1092.87
127	1020.37	1061.19
128	921.799	958.671
129	991.925	1031.6
130	993.955	1033.71
131	994.093	1033.86
132	1019.13	1059.9
133	930.976	968.215
134	979.428	1018.6
135	931.093	968.337
136	1038.82	1080.38
137	1060.43	1102.85
138	990.827	1030.46
139	1019.21	1059.98
140	1035.15	1076.55
141	1024.6	1065.58
142	1029.87	1071.06
143	990.146	1029.75
144	1021.35	1062.2
145	936.67	974.136
146	1025.16	1066.16

## Sheet: National zoo
	Predictive value	Actual value
0	1651.02	1692.3
1	1941.55	1990.09
2	1477.29	1514.23
3	1783.94	1828.54
4	1628.08	1668.78
5	1544.49	1583.1
6	1468.37	1505.08
7	1619.72	1660.22
8	1682.59	1724.65
9	1636.08	1676.98
10	1673.15	1714.97
11	1671.08	1712.85
12	1580.16	1619.67
13	1779.36	1823.84
14	1526.02	1564.17
15	1296.22	1328.62
16	1378.67	1413.14
17	1859.36	1905.84
18	1538.51	1576.97
19	1462.63	1499.19
20	1479.99	1516.99
21	1493.2	1530.53
22	1530.89	1569.16
23	1529.66	1567.9
24	1569.4	1608.63
25	1813.37	1858.71
26	1610.53	1650.79
27	1783.04	1827.62
28	1710.18	1752.94
29	1648.05	1689.25
30	1516.09	1554
31	1534.21	1572.57
32	1566.36	1605.52
33	1419.71	1455.21
34	1907.13	1954.81
35	1741.44	1784.97
36	1503	1540.58
37	1460.13	1496.63
38	1578.31	1617.77
39	1707.95	1750.65
40	1561.41	1600.45
41	1415.74	1451.14
42	1469.38	1506.11
43	1595.98	1635.88
44	1766.38	1810.54
45	1592.92	1632.74
46	1731.98	1775.28
47	1525.23	1563.36
48	1596.21	1636.12
49	1619.93	1660.43
50	1365.42	1399.56
51	1274.99	1306.87
52	1657.2	1698.63
53	1578.07	1617.52
54	1766.98	1811.16
55	1590.79	1630.56
56	1543.22	1581.8
57	1523.44	1561.53
58	1693.28	1735.61
59	1671.78	1713.58
60	1723.06	1766.14
61	1880.16	1927.16
62	1687.27	1729.45
63	1355.07	1388.95
64	1619.13	1659.61
65	1814.69	1860.06
66	1457.37	1493.8
67	1596.53	1636.44
68	1385.57	1420.21
69	1653.72	1695.06
70	1531.03	1569.31
71	1377.22	1411.65
72	1680.13	1722.14
73	1904.75	1952.37
74	1692.19	1734.49
75	1574.94	1614.31
76	2042.47	2093.54
77	1504.25	1541.86
78	1759.26	1803.24
79	1709.58	1752.32
80	1708.37	1751.08
81	1611.22	1651.5
82	1405.99	1441.14
83	1696.75	1739.17
84	1632.93	1673.75
85	1398.71	1433.67
86	2002.89	2052.96
87	1826.77	1872.44
88	1608.17	1648.38
89	1438.92	1474.89
90	1513.96	1551.81
91	1558.9	1597.87
92	1601.48	1641.52
93	1480.23	1517.23
94	1475.82	1512.71
95	1530.22	1568.47
96	1474.51	1511.37
97	1769.68	1813.92
98	1472.95	1509.77
99	1692.88	1735.2
100	1911.64	1959.43
101	1467.67	1504.37
102	1675.14	1717.02
103	1514.97	1552.84
104	1568.63	1607.84
105	1406.61	1441.77
106	1854.58	1900.94
107	1616.75	1657.17
108	1584.66	1624.28
109	1604.38	1644.49
110	1581.7	1621.24
111	1452.3	1488.61
112	1586.3	1625.96
113	1754.16	1798.01
114	1908.55	1956.26
115	1613.18	1653.51
116	1257.08	1288.51
117	1807.54	1852.73
118	1585.1	1624.73
119	1797.16	1842.09
120	1740.54	1784.06
121	1583.91	1623.5
122	1485.06	1522.19
123	1801.04	1846.06
124	1486.89	1524.06
125	1512.49	1550.3
126	1745.5	1789.14
127	1658.32	1699.77
128	1376.18	1410.58
129	1576.89	1616.31
130	1582.7	1622.26
131	1583.09	1622.67
132	1654.76	1696.13
133	1402.44	1437.5
134	1541.12	1579.65
135	1402.78	1437.85
136	1711.12	1753.9
137	1772.97	1817.3
138	1573.75	1613.09
139	1654.98	1696.36
140	1700.59	1743.11
141	1670.4	1712.16
142	1685.48	1727.62
143	1571.8	1611.09
144	1661.1	1702.63
145	1418.74	1454.21
146	1672	1713.8
